# Supplementary material
Source: publisher figshare collection journal article supplement (https://gsajournals.figshare.com/articles/dataset/_/10315898)
Supplement: Supplementary file 1 [file 1]

## Sheet: Sheet1
Table S2. Comparison of single nucleotide variants (SNVs) frequencies between resistant (YLR pool) and susceptible (YLS pool) mosquitoes in Anopheles sinensis.
No.	Scaffold	Position	Reference	Allele	Coding region change	Amino acid change	YLS-count	YSL-coverage	YSL allele frequency(%)	YLR-count	YSR-coverage	YSR allele frequency(%)	Fisher's Exact test p-value	FDR-adjusted p-value	-log10(adjusted p-value
1	AS2_scf7180000686832	17024	T	G	ASIC000009-RA:c.148A>C	ASIC000009:p.Lys50Gln	22	59	37.2881	29	60	48.3333	0.0707986	0.198091	0.703136
2	AS2_scf7180000686832	17045	G	C	ASIC000009-RA:c.127C>G	ASIC000009:p.Gln43Glu	19	52	36.5385	22	59	37.2881	0.15559	0.218903	0.659748
3	AS2_scf7180000686850	5733	T	A	ASIC000013-RA:c.658A>T	ASIC000013:p.Ile220Phe	55	84	65.4762	51	77	66.2338	0.131373	0.222403	0.652859
4	AS2_scf7180000686850	5750	G	A	ASIC000013-RA:c.641C>T	ASIC000013:p.Thr214Met	76	103	73.7864	73	107	68.2243	0.0818974	0.206322	0.685455
5	AS2_scf7180000686850	5777	A	G	ASIC000013-RA:c.614T>C	ASIC000013:p.Phe205Ser	89	123	72.3577	84	125	67.2	0.0746563	0.200738	0.697371
6	AS2_scf7180000686850	5841	T	C	ASIC000013-RA:c.550A>G	ASIC000013:p.Ile184Val	37	59	62.7119	25	59	42.3729	0.0129668	0.101328	0.994269
7	AS2_scf7180000686850	5863	C	A	ASIC000013-RA:c.528G>T	ASIC000013:p.Met176Ile	44	82	53.6585	29	73	39.726	0.0288519	0.143121	0.844297
8	AS2_scf7180000686850	5897	G	C	ASIC000013-RA:c.494C>G	ASIC000013:p.Thr165Ser	58	62	93.5484	40	48	83.3333	0.0598473	0.188967	0.723614
9	AS2_scf7180000686850	5900	T	C	ASIC000013-RA:c.491A>G	ASIC000013:p.Gln164Arg	41	63	65.0794	37	48	77.0833	0.0664528	0.194316	0.711491
10	AS2_scf7180000686850	6318	C	G	ASIC000013-RA:c.73G>C	ASIC000013:p.Gly25Arg	391	405	96.5432	331	353	93.7677	0.027834	0.140546	0.852181
11	AS2_scf7180000686850	8610	A	G	ASIC000014-RA:c.370T>C	ASIC000014:p.Ser124Pro	17	60	28.3333	29	65	44.6154	0.0253891	0.13593	0.866685
12	AS2_scf7180000686850	8748	A	G	ASIC000014-RA:c.232T>C	ASIC000014:p.Tyr78His	103	123	83.7398	117	143	81.8182	0.118986	0.221187	0.65524
13	AS2_scf7180000686850	8755	T	A	ASIC000014-RA:c.225A>T	ASIC000014:p.Gln75His	102	133	76.6917	106	154	68.8312	0.0352597	0.154255	0.811759
14	AS2_scf7180000686850	8770	T	A	ASIC000014-RA:c.210A>T	ASIC000014:p.Glu70Asp	114	148	77.027	112	164	68.2927	0.023049	0.130499	0.884392
15	AS2_scf7180000686850	8889	C	T	ASIC000014-RA:c.91G>A	ASIC000014:p.Glu31Lys	28	45	62.2222	25	47	53.1915	0.11471	0.219558	0.658451
16	AS2_scf7180000686986	7147	T	A	ASIC000043-RA:c.143T>A	ASIC000043:p.Ile48Asn	25	40	62.5	34	47	72.3404	0.113518	0.219852	0.65787
17	AS2_scf7180000686986	18034	C	T	ASIC000048-RA:c.595G>A	ASIC000048:p.Gly199Ser	18	41	43.9024	16	49	32.6531	0.0956072	0.213681	0.670234
18	AS2_scf7180000686986	18036	G	A	ASIC000048-RA:c.593C>T	ASIC000048:p.Pro198Leu	18	41	43.9024	16	49	32.6531	0.0956072	0.213652	0.670294
19	AS2_scf7180000686986	18040	T	C	ASIC000048-RA:c.589A>G	ASIC000048:p.Thr197Ala	39	41	95.122	41	47	87.234	0.136982	0.223138	0.651427
20	AS2_scf7180000686986	18048	T	C	ASIC000048-RA:c.581A>G	ASIC000048:p.His194Arg	43	46	93.4783	46	52	88.4615	0.196384	0.224824	0.648157
21	AS2_scf7180000686986	29759	C	G	ASIC000049-RA:c.91C>G	ASIC000049:p.Pro31Ala	34	43	79.0698	31	40	77.5	0.20637	0.233281	0.63212
22	AS2_scf7180000686986	29880	G	A	ASIC000049-RA:c.212G>A	ASIC000049:p.Cys71Tyr	21	44	47.7273	19	50	38	0.106	0.218306	0.660933
23	AS2_scf7180000686986	37392	A	T	ASIC000050-RA:c.149A>T	ASIC000050:p.Asn50Ile	13	48	27.0833	25	49	51.0204	0.00919499	0.0859531	1.06574
24	AS2_scf7180000686986	111524	T	G	ASIC000045-RA:c.32A>C	ASIC000045:p.Gln11Pro	18	41	43.9024	25	51	49.0196	0.148068	0.221722	0.654192
25	AS2_scf7180000687085	13070	T	C	ASIC000070-RA:c.447A>G	ASIC000070:p.Ile149Met	66	79	83.5443	67	99	67.6768	0.00732356	0.0775045	1.11067
26	AS2_scf7180000687085	13098	A	T	ASIC000070-RA:c.419T>A	ASIC000070:p.Ile140Asn	72	79	91.1392	109	116	93.9655	0.165308	0.213191	0.671231
27	AS2_scf7180000687085	13113	G	A	ASIC000070-RA:c.404C>T	ASIC000070:p.Ser135Leu	32	85	37.6471	45	133	33.8346	0.0975942	0.213622	0.670354
28	AS2_scf7180000687085	13192	C	G	ASIC000070-RA:c.325G>C	ASIC000070:p.Val109Leu	99	101	98.0198	139	148	93.9189	0.08099	0.205461	0.68727
29	AS2_scf7180000687085	13350	T	C	ASIC000070-RA:c.167A>G	ASIC000070:p.Asn56Ser	81	81	100	85	87	97.7011	0.266681	0.286475	0.542914
30	AS2_scf7180000687085	13395	G	C	ASIC000070-RA:c.122C>G	ASIC000070:p.Pro41Arg	70	91	76.9231	62	88	70.4545	0.083661	0.207849	0.682253
31	AS2_scf7180000687085	13452	A	C	ASIC000070-RA:c.65T>G	ASIC000070:p.Ile22Ser	84	101	83.1683	89	124	71.7742	0.016698	0.114737	0.940296
32	AS2_scf7180000687172	33824	T	C	ASIC000099-RA:c.712T>C	ASIC000099:p.Phe238Leu	34	40	85	38	45	84.4444	0.235767	0.258813	0.587015
33	AS2_scf7180000687172	43350	T	A	ASIC000101-RA:c.662T>A	ASIC000101:p.Val221Glu	23	48	47.9167	26	46	56.5217	0.116181	0.220334	0.656918
34	AS2_scf7180000687172	84266	G	T	ASIC000091-RA:c.694G>T	ASIC000091:p.Val232Phe	18	42	42.8571	14	42	33.3333	0.119728	0.221358	0.654905
35	AS2_scf7180000687172	92249	A	G	ASIC000093-RA:c.503T>C	ASIC000093:p.Ile168Thr	37	40	92.5	63	63	100	0.0558662	0.185238	0.732269
36	AS2_scf7180000687172	92435	A	T	ASIC000093-RA:c.317T>A	ASIC000093:p.Val106Glu	45	50	90	39	42	92.8571	0.261314	0.281673	0.550255
37	AS2_scf7180000687172	92657	A	T	ASIC000093-RA:c.95T>A	ASIC000093:p.Phe32Tyr	29	55	52.7273	14	40	35	0.0389795	0.161697	0.791298
38	AS2_scf7180000687438	30993	G	A	ASIC000146-RA:c.5398C>T	ASIC000146:p.Pro1800Ser	25	52	48.0769	16	46	34.7826	0.0680948	0.195342	0.709204
39	AS2_scf7180000687438	31050	T	A	ASIC000146-RA:c.5341A>T	ASIC000146:p.Thr1781Ser	30	58	51.7241	14	40	35	0.0439074	0.169529	0.770756
40	AS2_scf7180000687438	31066	A	C	ASIC000146-RA:c.5325T>G	ASIC000146:p.Tyr1775*	26	49	53.0612	22	42	52.381	0.166286	0.212507	0.672626
41	AS2_scf7180000687438	31068	A	T	ASIC000146-RA:c.5323T>A	ASIC000146:p.Tyr1775Asn	30	46	65.2174	28	42	66.6667	0.176176	0.210156	0.677458
42	AS2_scf7180000687438	31133	G	A	ASIC000146-RA:c.5258C>T	ASIC000146:p.Ala1753Val	31	42	73.8095	26	42	61.9048	0.0949036	0.213422	0.670761
43	AS2_scf7180000687438	31230	T	C	ASIC000146-RA:c.5161A>G	ASIC000146:p.Asn1721Asp	15	47	31.9149	20	48	41.6667	0.1047	0.218159	0.661227
44	AS2_scf7180000687438	32342	A	T	ASIC000146-RA:c.4049T>A	ASIC000146:p.Phe1350Tyr	41	53	77.3585	29	40	72.5	0.165105	0.213435	0.670735
45	AS2_scf7180000687438	38126	A	G	ASIC000146-RA:c.3248T>C	ASIC000146:p.Val1083Ala	41	46	89.1304	40	44	90.9091	0.263477	0.283573	0.547334
46	AS2_scf7180000687438	61390	T	C	ASIC000148-RA:c.31A>G	ASIC000148:p.Thr11Ala	14	41	34.1463	27	53	50.9434	0.0451167	0.171165	0.766585
47	AS2_scf7180000687438	61407	A	G	ASIC000148-RA:c.14T>C	ASIC000148:p.Leu5Ser	38	48	79.1667	40	48	83.3333	0.180447	0.212581	0.672475
48	AS2_scf7180000687438	88841	C	A	ASIC000150-RA:c.206G>T	ASIC000150:p.Arg69Leu	39	44	88.6364	40	55	72.7273	0.0301389	0.145271	0.83782
49	AS2_scf7180000687438	110416	C	T	ASIC000151-RA:c.68C>T	ASIC000151:p.Ser23Leu	30	49	61.2245	22	42	52.381	0.117867	0.221069	0.655472
50	AS2_scf7180000687438	110502	C	G	ASIC000151-RA:c.154C>G	ASIC000151:p.Leu52Val	40	40	100	42	43	97.6744	0.518072	0.522775	0.281685
51	AS2_scf7180000687438	116817	A	T	ASIC000152-RA:c.1709T>A	ASIC000152:p.Val570Glu	41	41	100	42	43	97.6744	0.511905	0.517447	0.286134
52	AS2_scf7180000687438	118535	T	C	ASIC000152-RA:c.127A>G	ASIC000152:p.Ser43Gly	26	43	60.4651	28	40	70	0.121725	0.221342	0.654936
53	AS2_scf7180000687438	118553	A	G	ASIC000152-RA:c.109T>C	ASIC000152:p.Tyr37His	25	51	49.0196	25	48	52.0833	0.152169	0.22039	0.656809
54	AS2_scf7180000687462	6057	T	G	ASIC000158-RA:c.613A>C	ASIC000158:p.Lys205Gln	302	362	83.4254	340	407	83.5381	0.0773824	0.2026	0.69336
55	AS2_scf7180000687462	6410	A	T	ASIC000158-RA:c.260T>A	ASIC000158:p.Leu87Gln	55	59	93.2203	48	50	96	0.27532	0.294554	0.530835
56	AS2_scf7180000687462	23446	G	T	ASIC000170-RA:c.977C>A	ASIC000170:p.Ala326Asp	47	54	87.037	38	48	79.1667	0.120723	0.220898	0.655808
57	AS2_scf7180000687462	41398	A	G	ASIC000173-RA:c.4A>G	ASIC000173:p.Lys2Glu	43	44	97.7273	40	40	100	0.52381	0.527587	0.277706
58	AS2_scf7180000687462	41407	G	A	ASIC000173-RA:c.13G>A	ASIC000173:p.Ala5Thr	18	41	43.9024	16	41	39.0244	0.160622	0.216048	0.665449
59	AS2_scf7180000687462	45058	G	C	ASIC000174-RA:c.316G>C	ASIC000174:p.Glu106Gln	23	45	51.1111	21	41	51.2195	0.1708	0.210108	0.677557
60	AS2_scf7180000687462	45136	G	C	ASIC000174-RA:c.394G>C	ASIC000174:p.Glu132Gln	19	43	44.186	15	41	36.5854	0.137566	0.223132	0.651438
61	AS2_scf7180000687462	46187	T	C	ASIC000174-RA:c.1381T>C	ASIC000174:p.Trp461Arg	37	40	92.5	44	50	88	0.2223	0.247303	0.606771
62	AS2_scf7180000687462	76902	T	C	ASIC000159-RA:c.1630A>G	ASIC000159:p.Thr544Ala	38	47	80.8511	43	54	79.6296	0.19517	0.223826	0.65009
63	AS2_scf7180000687470	24423	A	G	ASIC000181-RA:c.331A>G	ASIC000181:p.Thr111Ala	32	48	66.6667	28	49	57.1429	0.104835	0.218134	0.661277
64	AS2_scf7180000687470	24428	C	G	ASIC000181-RA:c.336C>G	ASIC000181:p.His112Gln	37	49	75.5102	43	51	84.3137	0.109612	0.218929	0.659697
65	AS2_scf7180000687470	24438	G	A	ASIC000181-RA:c.346G>A	ASIC000181:p.Gly116Ser	27	42	64.2857	21	56	37.5	0.00532235	0.066795	1.17526
66	AS2_scf7180000687470	24442	A	G	ASIC000181-RA:c.350A>G	ASIC000181:p.Glu117Gly	28	42	66.6667	22	55	40	0.00562286	0.0685654	1.1639
67	AS2_scf7180000687470	24522	A	G	ASIC000181-RA:c.430A>G	ASIC000181:p.Asn144Asp	25	41	60.9756	16	50	32	0.00381928	0.0568887	1.24497
68	AS2_scf7180000687470	26581	A	G	ASIC000181-RA:c.1147A>G	ASIC000181:p.Lys383Glu	105	242	43.3884	79	174	45.4023	0.0733029	0.199628	0.699778
69	AS2_scf7180000687470	26773	A	C	ASIC000181-RA:c.1339A>C	ASIC000181:p.Ile447Leu	127	232	54.7414	99	191	51.8325	0.0653049	0.193522	0.713269
70	AS2_scf7180000687470	26900	C	T	ASIC000181-RA:c.1466C>T	ASIC000181:p.Ala489Val	64	135	47.4074	58	90	64.4444	0.00465042	0.0627999	1.20204
71	AS2_scf7180000687470	26988	T	G	ASIC000181-RA:c.1554T>G	ASIC000181:p.Asp518Glu	44	52	84.6154	34	40	85	0.229261	0.253117	0.596679
72	AS2_scf7180000687554	5284	G	T	ASIC000200-RA:c.137G>T	ASIC000200:p.Arg46Leu	114	314	36.3057	117	324	36.1111	0.0655632	0.193656	0.71297
73	AS2_scf7180000687554	5289	C	A	ASIC000200-RA:c.142C>A	ASIC000200:p.Leu48Ile	114	323	35.2941	119	334	35.6287	0.0647356	0.193839	0.712559
74	AS2_scf7180000687554	5461	A	T	ASIC000200-RA:c.314A>T	ASIC000200:p.Gln105Leu	90	102	88.2353	85	96	88.5417	0.174781	0.209716	0.678368
75	AS2_scf7180000687554	5515	G	T	ASIC000200-RA:c.368G>T	ASIC000200:p.Arg123Leu	100	149	67.1141	91	166	54.8193	0.00770711	0.0793037	1.10071
76	AS2_scf7180000687554	5544	G	T	ASIC000200-RA:c.397G>T	ASIC000200:p.Gly133Cys	97	148	65.5405	107	162	66.0494	0.0949293	0.213421	0.670763
77	AS2_scf7180000687554	5574	T	C	ASIC000200-RA:c.427T>C	ASIC000200:p.Phe143Leu	87	107	81.3084	83	101	82.1782	0.140506	0.223725	0.650286
78	AS2_scf7180000687555	11290	A	G	ASIC000208-RA:c.602A>G	ASIC000208:p.Lys201Arg	14	40	35	17	43	39.5349	0.164302	0.21392	0.669749
79	AS2_scf7180000687555	12603	A	G	ASIC000209-RA:c.67A>G	ASIC000209:p.Lys23Glu	60	68	88.2353	47	53	88.6792	0.224177	0.248781	0.604183
80	AS2_scf7180000687555	12606	T	C	ASIC000209-RA:c.70T>C	ASIC000209:p.Ser24Pro	57	65	87.6923	45	52	86.5385	0.213852	0.239831	0.620094
81	AS2_scf7180000687555	12642	T	A	ASIC000209-RA:c.106T>A	ASIC000209:p.Ser36Thr	60	66	90.9091	46	57	80.7018	0.056273	0.185458	0.731754
82	AS2_scf7180000687555	12682	A	C	ASIC000209-RA:c.146A>C	ASIC000209:p.Glu49Ala	61	63	96.8254	50	62	80.6452	0.00344397	0.0540063	1.26756
83	AS2_scf7180000687555	12686	A	T	ASIC000209-RA:c.150A>T	ASIC000209:p.Glu50Asp	59	61	96.7213	50	62	80.6452	0.00409661	0.0595539	1.22509
84	AS2_scf7180000687555	12717	A	C	ASIC000209-RA:c.181A>C	ASIC000209:p.Ile61Leu	21	44	47.7273	10	44	22.7273	0.00897211	0.0846445	1.0724
85	AS2_scf7180000687555	12723	A	C	ASIC000209-RA:c.187A>C	ASIC000209:p.Asn63His	19	40	47.5	10	42	23.8095	0.0153598	0.109886	0.959058
86	AS2_scf7180000687555	32079	G	C	ASIC000211-RA:c.53G>C	ASIC000211:p.Cys18Ser	99	133	74.4361	127	170	74.7059	0.105502	0.218161	0.661222
87	AS2_scf7180000687555	32090	T	G	ASIC000211-RA:c.64T>G	ASIC000211:p.Ser22Ala	130	142	91.5493	146	169	86.3905	0.052293	0.182306	0.739199
88	AS2_scf7180000687555	32249	T	C	ASIC000211-RA:c.223T>C	ASIC000211:p.Tyr75His	117	123	95.122	113	122	92.623	0.152576	0.220335	0.656917
89	AS2_scf7180000687555	32321	A	G	ASIC000211-RA:c.295A>G	ASIC000211:p.Asn99Asp	80	110	72.7273	111	132	84.0909	0.012556	0.0998369	1.00071
90	AS2_scf7180000687555	32496	G	C	ASIC000211-RA:c.470G>C	ASIC000211:p.Ser157Thr	71	119	59.6639	57	108	52.7778	0.0619769	0.191582	0.717646
91	AS2_scf7180000687555	32496	G	T	ASIC000211-RA:c.470G>T	ASIC000211:p.Ser157Ile	48	119	40.3361	51	108	47.2222	0.0619769	0.191546	0.717728
92	AS2_scf7180000687555	34023	G	A	ASIC000212-RA:c.233G>A	ASIC000212:p.Gly78Glu	17	48	35.4167	25	60	41.6667	0.127224	0.222574	0.652526
93	AS2_scf7180000687597	28049	T	C	ASIC000223-RA:c.188T>C	ASIC000223:p.Leu63Pro	41	41	100	35	43	81.3953	0.00332625	0.053129	1.27467
94	AS2_scf7180000687597	28079	T	A	ASIC000223-RA:c.218T>A	ASIC000223:p.Ile73Asn	18	47	38.2979	27	49	55.102	0.0424844	0.166954	0.777403
95	AS2_scf7180000687597	28090	A	T	ASIC000223-RA:c.229A>T	ASIC000223:p.Thr77Ser	26	42	61.9048	25	50	50	0.0878076	0.209243	0.67935
96	AS2_scf7180000687597	29150	T	C	ASIC000224-RA:c.62T>C	ASIC000224:p.Leu21Ser	25	43	58.1395	39	52	75	0.0390195	0.161658	0.791403
97	AS2_scf7180000687597	30523	C	T	ASIC000225-RA:c.82C>T	ASIC000225:p.Leu28Phe	31	49	63.2653	36	50	72	0.111427	0.219364	0.658836
98	AS2_scf7180000687597	30643	G	A	ASIC000225-RA:c.202G>A	ASIC000225:p.Asp68Asn	14	51	27.451	21	43	48.8372	0.0179232	0.117522	0.92988
99	AS2_scf7180000687748	30426	G	A	ASIC000263-RA:c.541G>A	ASIC000263:p.Ala181Thr	13	42	30.9524	21	47	44.6809	0.0727304	0.199331	0.700424
100	AS2_scf7180000687748	30537	A	G	ASIC000263-RA:c.652A>G	ASIC000263:p.Asn218Asp	14	47	29.7872	37	52	71.1538	3.1589e-05	0.00697519	2.15644
101	AS2_scf7180000687748	31569	A	G	ASIC000263-RA:c.1481A>G	ASIC000263:p.Glu494Gly	40	45	88.8889	39	40	97.5	0.111741	0.219427	0.658711
102	AS2_scf7180000687748	31620	C	G	ASIC000263-RA:c.1532C>G	ASIC000263:p.Thr511Ser	36	43	83.7209	40	40	100	0.00776126	0.0796101	1.09903
103	AS2_scf7180000687748	65887	G	C	ASIC000266-RA:c.289C>G	ASIC000266:p.Pro97Ala	10	44	22.7273	26	48	54.1667	0.00144489	0.035238	1.45299
104	AS2_scf7180000687748	73471	T	C	ASIC000267-RA:c.1291A>G	ASIC000267:p.Thr431Ala	24	40	60	26	49	53.0612	0.137809	0.223105	0.65149
105	AS2_scf7180000687855	4284	G	C	ASIC000283-RA:c.270G>C	ASIC000283:p.Lys90Asn	21	40	52.5	30	56	53.5714	0.163261	0.214876	0.667812
106	AS2_scf7180000687855	4288	T	C	ASIC000283-RA:c.274T>C	ASIC000283:p.Ser92Pro	16	46	34.7826	23	56	41.0714	0.132092	0.222858	0.651972
107	AS2_scf7180000687855	12966	C	A	ASIC000287-RA:c.1548C>A	ASIC000287:p.His516Gln	25	45	55.5556	23	46	50	0.144777	0.222713	0.652254
108	AS2_scf7180000687855	17969	G	A	ASIC000287-RA:c.3784G>A	ASIC000287:p.Ala1262Thr	32	52	61.5385	47	55	85.4545	0.00341152	0.0537554	1.26958
109	AS2_scf7180000687855	18194	C	A	ASIC000287-RA:c.4009C>A	ASIC000287:p.His1337Asn	18	51	35.2941	22	45	48.8889	0.0671912	0.194423	0.711253
110	AS2_scf7180000687855	18571	C	A	ASIC000287-RA:c.4386C>A	ASIC000287:p.Asp1462Glu	22	42	52.381	20	50	40	0.0831889	0.207528	0.682924
111	AS2_scf7180000687855	19076	G	A	ASIC000287-RA:c.4891G>A	ASIC000287:p.Val1631Met	31	53	58.4906	29	41	70.7317	0.0825378	0.207073	0.683876
112	AS2_scf7180000687855	19292	G	A	ASIC000287-RA:c.5107G>A	ASIC000287:p.Ala1703Thr	16	41	39.0244	15	42	35.7143	0.170972	0.210099	0.677577
113	AS2_scf7180000687855	19545	A	G	ASIC000287-RA:c.5360A>G	ASIC000287:p.Asn1787Ser	37	42	88.0952	30	48	62.5	0.00394617	0.0578818	1.23746
114	AS2_scf7180000688186	17006	A	G	ASIC000369-RA:c.188A>G	ASIC000369:p.Tyr63Cys	48	51	94.1176	44	47	93.617	0.320798	0.338467	0.470484
115	AS2_scf7180000688186	32026	C	T	ASIC000370-RA:c.68G>A	ASIC000370:p.Arg23His	14	40	35	27	43	62.7907	0.00733102	0.077433	1.11107
116	AS2_scf7180000688186	32047	A	T	ASIC000370-RA:c.47T>A	ASIC000370:p.Val16Glu	34	47	72.3404	42	43	97.6744	0.000669251	0.0245192	1.61049
117	AS2_scf7180000688186	32051	C	T	ASIC000370-RA:c.43G>A	ASIC000370:p.Glu15Lys	35	50	70	41	42	97.619	0.000299828	0.016778	1.77526
118	AS2_scf7180000688244	13085	C	T	ASIC000386-RA:c.541G>A	ASIC000386:p.Ala181Thr	37	41	90.2439	46	54	85.1852	0.192775	0.221936	0.653771
119	AS2_scf7180000688244	13262	G	T	ASIC000386-RA:c.457C>A	ASIC000386:p.Leu153Met	14	50	28	23	45	51.1111	0.0120918	0.0978604	1.00939
120	AS2_scf7180000688244	13355	G	C	ASIC000386-RA:c.364C>G	ASIC000386:p.Leu122Val	28	43	65.1163	30	49	61.2245	0.159378	0.216875	0.663791
121	AS2_scf7180000688244	26966	G	A	ASIC000387-RA:c.1006G>A	ASIC000387:p.Ala336Thr	27	46	58.6957	15	42	35.7143	0.0170857	0.115364	0.937931
122	AS2_scf7180000688244	27822	A	C	ASIC000387-RA:c.1717A>C	ASIC000387:p.Thr573Pro	35	48	72.9167	16	40	40	0.00139571	0.034502	1.46216
123	AS2_scf7180000688244	28417	A	T	ASIC000387-RA:c.2312A>T	ASIC000387:p.Gln771Leu	28	41	68.2927	26	43	60.4651	0.137107	0.223119	0.651464
124	AS2_scf7180000688244	28782	G	A	ASIC000387-RA:c.2677G>A	ASIC000387:p.Ala893Thr	21	48	43.75	19	45	42.2222	0.16406	0.213996	0.669593
125	AS2_scf7180000688244	28926	C	T	ASIC000387-RA:c.2821C>T	ASIC000387:p.His941Tyr	45	47	95.7447	45	45	100	0.258242	0.279097	0.554245
126	AS2_scf7180000688244	29020	T	C	ASIC000387-RA:c.2915T>C	ASIC000387:p.Ile972Thr	16	41	39.0244	18	54	33.3333	0.144936	0.222622	0.652433
127	AS2_scf7180000688244	29129	T	A	ASIC000387-RA:c.3024T>A	ASIC000387:p.Asp1008Glu	17	52	32.6923	18	45	40	0.127298	0.222537	0.652598
128	AS2_scf7180000688244	29166	G	A	ASIC000387-RA:c.3061G>A	ASIC000387:p.Ala1021Thr	35	42	83.3333	30	41	73.1707	0.114076	0.21976	0.658051
129	AS2_scf7180000688244	29307	T	G	ASIC000387-RA:c.3202T>G	ASIC000387:p.Ser1068Ala	42	55	76.3636	23	44	52.2727	0.00762034	0.0789077	1.10288
130	AS2_scf7180000688244	29328	A	G	ASIC000387-RA:c.3223A>G	ASIC000387:p.Thr1075Ala	17	40	42.5	13	41	31.7073	0.110964	0.219165	0.659229
131	AS2_scf7180000688244	29433	G	A	ASIC000387-RA:c.3328G>A	ASIC000387:p.Ala1110Thr	44	44	100	38	44	86.3636	0.0130257	0.101498	0.993544
132	AS2_scf7180000688244	29940	T	C	ASIC000387-RA:c.3835T>C	ASIC000387:p.Ser1279Pro	37	41	90.2439	41	41	100	0.0578997	0.187194	0.727707
133	AS2_scf7180000688244	29944	T	C	ASIC000387-RA:c.3839T>C	ASIC000387:p.Ile1280Thr	42	45	93.3333	40	40	100	0.143667	0.222704	0.652272
134	AS2_scf7180000688244	35421	T	C	ASIC000388-RA:c.11T>C	ASIC000388:p.Val4Ala	24	47	51.0638	29	41	70.7317	0.0303301	0.145336	0.837628
135	AS2_scf7180000688244	36421	C	G	ASIC000388-RA:c.945C>G	ASIC000388:p.Asp315Glu	39	44	88.6364	38	42	90.4762	0.264337	0.284349	0.546148
136	AS2_scf7180000688244	42442	G	T	ASIC000390-RA:c.1068G>T	ASIC000390:p.Glu356Asp	20	40	50	31	48	64.5833	0.0673431	0.194518	0.711041
137	AS2_scf7180000688253	27170	A	T	ASIC000397-RA:c.817T>A	ASIC000397:p.Ser273Thr	16	43	37.2093	19	47	40.4255	0.163288	0.214877	0.667811
138	AS2_scf7180000688282	16180	A	G	ASIC000405-RA:c.106T>C	ASIC000405:p.Ser36Pro	30	44	68.1818	15	40	37.5	0.00340442	0.0537991	1.26922
139	AS2_scf7180000688282	20582	C	T	ASIC000407-RA:c.70G>A	ASIC000407:p.Gly24Ser	28	49	57.1429	25	44	56.8182	0.165882	0.21289	0.671844
140	AS2_scf7180000688358	28561	A	G	ASIC000427-RA:c.61A>G	ASIC000427:p.Lys21Glu	31	46	67.3913	38	60	63.3333	0.14883	0.221603	0.654424
141	AS2_scf7180000688358	28631	C	T	ASIC000427-RA:c.131C>T	ASIC000427:p.Thr44Met	22	48	45.8333	30	58	51.7241	0.129291	0.222381	0.652902
142	AS2_scf7180000688913	12570	A	G	ASIC000522-RA:c.1A>G	ASIC000522:p.Met1?	39	43	90.6977	43	46	93.4783	0.271885	0.291185	0.535831
143	AS2_scf7180000688913	42279	C	T	ASIC000525-RA:c.184G>A	ASIC000525:p.Glu62Lys	33	47	70.2128	26	43	60.4651	0.110444	0.219278	0.659006
144	AS2_scf7180000688913	42452	A	C	ASIC000525-RA:c.11T>G	ASIC000525:p.Val4Gly	28	50	56	32	51	62.7451	0.127006	0.22267	0.652339
145	AS2_scf7180000688913	71774	T	G	ASIC000528-RA:c.45A>C	ASIC000528:p.Gln15His	53	61	86.8852	43	49	87.7551	0.224154	0.248773	0.604197
146	AS2_scf7180000688913	76661	G	A	ASIC000529-RA:c.305C>T	ASIC000529:p.Ala102Val	16	43	37.2093	35	44	79.5455	5.14645e-05	0.00800885	2.09643
147	AS2_scf7180000689180	37795	G	A	ASIC000600-RA:c.92G>A	ASIC000600:p.Arg31Gln	44	44	100	39	44	88.6364	0.0277214	0.140325	0.852866
148	AS2_scf7180000689180	53083	G	C	ASIC000622-RA:c.13G>C	ASIC000622:p.Val5Leu	19	42	45.2381	24	44	54.5455	0.118536	0.221029	0.655551
149	AS2_scf7180000689180	87311	A	C	ASIC000568-RA:c.148T>G	ASIC000568:p.Ser50Ala	39	42	92.8571	36	43	83.7209	0.118221	0.221123	0.655366
150	AS2_scf7180000689180	113722	A	G	ASIC000571-RA:c.188T>C	ASIC000571:p.Leu63Pro	39	43	90.6977	39	41	95.122	0.248956	0.270781	0.567381
151	AS2_scf7180000689180	113909	T	G	ASIC000571-RA:c.1A>C	ASIC000571:p.Met1?	35	44	79.5455	35	40	87.5	0.146982	0.22207	0.65351
152	AS2_scf7180000689180	130252	A	G	ASIC000574-RA:c.178T>C	ASIC000574:p.Ser60Pro	32	41	78.0488	29	40	72.5	0.172529	0.20946	0.6789
153	AS2_scf7180000689180	132635	G	C	ASIC000576-RA:c.391G>C	ASIC000576:p.Asp131His	21	58	36.2069	19	48	39.5833	0.149484	0.221428	0.654768
154	AS2_scf7180000689180	134026	C	A	ASIC000577-RA:c.313C>A	ASIC000577:p.Gln105Lys	23	50	46	29	60	48.3333	0.147609	0.221828	0.653983
155	AS2_scf7180000689180	134029	C	G	ASIC000577-RA:c.316C>G	ASIC000577:p.Gln106Glu	22	48	45.8333	30	57	52.6316	0.122521	0.221607	0.654417
156	AS2_scf7180000689180	134188	A	G	ASIC000577-RA:c.475A>G	ASIC000577:p.Thr159Ala	39	40	97.5	39	40	97.5	0.506329	0.512667	0.290165
157	AS2_scf7180000689180	147164	A	T	ASIC000582-RA:c.809A>T	ASIC000582:p.Glu270Val	39	42	92.8571	38	41	92.6829	0.324222	0.341243	0.466937
158	AS2_scf7180000689180	154087	C	G	ASIC000583-RA:c.23G>C	ASIC000583:p.Trp8Ser	23	40	57.5	20	46	43.4783	0.0749722	0.200992	0.696821
159	AS2_scf7180000689180	165279	C	T	ASIC000584-RA:c.1795G>A	ASIC000584:p.Val599Met	20	47	42.5532	13	42	30.9524	0.0931709	0.212657	0.67232
160	AS2_scf7180000689180	169717	T	A	ASIC000585-RA:c.1455T>A	ASIC000585:p.Asn485Lys	14	49	28.5714	22	51	43.1373	0.053303	0.183594	0.736141
161	AS2_scf7180000689180	169717	T	G	ASIC000585-RA:c.1455T>G	ASIC000585:p.Asn485Lys	22	49	44.898	25	51	49.0196	0.14599	0.222319	0.653024
162	AS2_scf7180000689180	206128	T	C	ASIC000590-RA:c.2503A>G	ASIC000590:p.Thr835Ala	31	49	63.2653	32	45	71.1111	0.126469	0.22254	0.652592
163	AS2_scf7180000689180	206131	A	G	ASIC000590-RA:c.2500T>C	ASIC000590:p.Ser834Pro	28	44	63.6364	34	48	70.8333	0.134886	0.223193	0.651319
164	AS2_scf7180000689180	206140	C	T	ASIC000590-RA:c.2491G>A	ASIC000590:p.Ala831Thr	46	47	97.8723	46	46	100	0.505376	0.513197	0.289716
165	AS2_scf7180000689180	237916	G	C	ASIC000592-RA:c.12G>C	ASIC000592:p.Glu4Asp	39	48	81.25	40	42	95.2381	0.0347074	0.153983	0.812528
166	AS2_scf7180000689180	253450	T	A	ASIC000594-RA:c.1691A>T	ASIC000594:p.Glu564Val	22	46	47.8261	16	45	35.5556	0.0843759	0.208232	0.681453
167	AS2_scf7180000689180	257922	T	C	ASIC000594-RA:c.691A>G	ASIC000594:p.Ile231Val	48	49	97.9592	51	53	96.2264	0.393256	0.409678	0.387557
168	AS2_scf7180000689180	274091	G	T	ASIC000595-RA:c.34C>A	ASIC000595:p.Leu12Ile	30	47	63.8298	28	57	49.1228	0.0517545	0.181318	0.741558
169	AS2_scf7180000689180	274107	T	A	ASIC000595-RA:c.18A>T	ASIC000595:p.Lys6Asn	31	45	68.8889	26	51	50.9804	0.0344921	0.153654	0.813457
170	AS2_scf7180000689180	277069	T	C	ASIC000596-RA:c.803T>C	ASIC000596:p.Phe268Ser	40	47	85.1064	39	40	97.5	0.0430516	0.167691	0.77549
171	AS2_scf7180000689180	291355	A	T	ASIC000598-RA:c.2099A>T	ASIC000598:p.Lys700Met	24	43	55.814	10	43	23.2558	0.00150854	0.0358799	1.44515
172	AS2_scf7180000689180	291378	C	T	ASIC000598-RA:c.2122C>T	ASIC000598:p.Pro708Ser	32	41	78.0488	24	42	57.1429	0.0243149	0.132967	0.876256
173	AS2_scf7180000689180	324693	G	A	ASIC000604-RA:c.340C>T	ASIC000604:p.Pro114Ser	31	50	62	23	44	52.2727	0.106	0.218279	0.660988
174	AS2_scf7180000689180	348731	G	C	ASIC000606-RA:c.472G>C	ASIC000606:p.Val158Leu	28	45	62.2222	27	49	55.102	0.130571	0.222382	0.6529
175	AS2_scf7180000689180	351799	C	T	ASIC000607-RA:c.3247G>A	ASIC000607:p.Ala1083Thr	49	50	98	45	45	100	0.526316	0.529687	0.275981
176	AS2_scf7180000689180	354045	G	A	ASIC000607-RA:c.1789C>T	ASIC000607:p.Pro597Ser	40	41	97.561	36	41	87.8049	0.0877461	0.209462	0.678894
177	AS2_scf7180000689180	354237	G	A	ASIC000607-RA:c.1597C>T	ASIC000607:p.Leu533Phe	42	45	93.3333	43	48	89.5833	0.238583	0.261202	0.583024
178	AS2_scf7180000689180	355487	T	C	ASIC000607-RA:c.509A>G	ASIC000607:p.Tyr170Cys	35	50	70	42	58	72.4138	0.162202	0.21553	0.666491
179	AS2_scf7180000689180	355553	G	A	ASIC000607-RA:c.443C>T	ASIC000607:p.Ala148Val	23	48	47.9167	20	53	37.7358	0.0943791	0.213417	0.67077
180	AS2_scf7180000689180	355634	A	G	ASIC000607-RA:c.362T>C	ASIC000607:p.Val121Ala	47	47	100	47	48	97.9167	0.505263	0.513273	0.289651
181	AS2_scf7180000689180	355863	T	C	ASIC000607-RA:c.133A>G	ASIC000607:p.Asn45Asp	26	44	59.0909	34	44	77.2727	0.03494	0.154011	0.812447
182	AS2_scf7180000689180	355899	G	T	ASIC000607-RA:c.97C>A	ASIC000607:p.Pro33Thr	25	42	59.5238	37	46	80.4348	0.0191976	0.120696	0.918308
183	AS2_scf7180000689180	400439	G	T	ASIC000612-RA:c.186C>A	ASIC000612:p.Asn62Lys	38	40	95	43	46	93.4783	0.339984	0.357234	0.447047
184	AS2_scf7180000689180	420413	T	G	ASIC000614-RA:c.74T>G	ASIC000614:p.Val25Gly	30	41	73.1707	43	45	95.5556	0.00359373	0.0551895	1.25814
185	AS2_scf7180000689180	432714	T	G	ASIC000615-RA:c.19A>C	ASIC000615:p.Asn7His	21	50	42	21	45	46.6667	0.147726	0.221779	0.654079
186	AS2_scf7180000689180	432728	G	T	ASIC000615-RA:c.5C>A	ASIC000615:p.Pro2Gln	17	44	38.6364	22	44	50	0.0966053	0.213604	0.670392
187	AS2_scf7180000689180	432730	C	T	ASIC000615-RA:c.3G>A	ASIC000615:p.Met1?	17	44	38.6364	22	44	50	0.0966053	0.213575	0.67045
188	AS2_scf7180000689180	470592	T	C	ASIC000617-RA:c.179T>C	ASIC000617:p.Leu60Pro	49	50	98	45	45	100	0.526316	0.529654	0.276007
189	AS2_scf7180000689237	19125	G	T	ASIC000637-RA:c.309C>A	ASIC000637:p.Tyr103*	40	43	93.0233	50	51	98.0392	0.206391	0.233241	0.632194
190	AS2_scf7180000689237	19415	C	G	ASIC000637-RA:c.19G>C	ASIC000637:p.Gly7Arg	12	41	29.2683	30	41	73.1707	6.01815e-05	0.00840483	2.07547
191	AS2_scf7180000689237	60463	C	A	ASIC000641-RA:c.718C>A	ASIC000641:p.Leu240Met	23	46	50	14	45	31.1111	0.0322879	0.149331	0.825851
192	AS2_scf7180000689237	61165	A	G	ASIC000641-RA:c.1420A>G	ASIC000641:p.Ser474Gly	24	47	51.0638	28	51	54.902	0.149392	0.221412	0.6548
193	AS2_scf7180000689237	62013	A	T	ASIC000642-RA:c.1885T>A	ASIC000642:p.Ser629Thr	33	52	63.4615	22	44	50	0.0688134	0.196164	0.707381
194	AS2_scf7180000689237	62046	C	G	ASIC000642-RA:c.1852G>C	ASIC000642:p.Val618Leu	37	42	88.0952	43	44	97.7273	0.0796107	0.203989	0.690393
195	AS2_scf7180000689237	62082	T	A	ASIC000642-RA:c.1816A>T	ASIC000642:p.Thr606Ser	38	40	95	43	44	97.7273	0.360186	0.377829	0.422704
196	AS2_scf7180000689237	62139	T	C	ASIC000642-RA:c.1759A>G	ASIC000642:p.Thr587Ala	48	49	97.9592	48	48	100	0.505155	0.513291	0.289637
197	AS2_scf7180000689237	63357	A	T	ASIC000642-RA:c.541T>A	ASIC000642:p.Ser181Thr	45	52	86.5385	38	40	95	0.120117	0.22135	0.654921
198	AS2_scf7180000689237	72902	C	G	ASIC000635-RA:c.2909G>C	ASIC000635:p.Gly970Ala	37	47	78.7234	41	49	83.6735	0.170728	0.210099	0.677577
199	AS2_scf7180000689293	13272	A	G	ASIC000651-RA:c.1160T>C	ASIC000651:p.Val387Ala	25	40	62.5	7	40	17.5	3.4228e-05	0.00690476	2.16085
200	AS2_scf7180000689293	13276	C	G	ASIC000651-RA:c.1156G>C	ASIC000651:p.Gly386Arg	24	41	58.5366	7	41	17.0732	9.14384e-05	0.00996069	2.00171
201	AS2_scf7180000689293	14905	A	T	ASIC000652-RA:c.1595T>A	ASIC000652:p.Leu532Gln	24	41	58.5366	18	50	36	0.0172991	0.1158	0.936293
202	AS2_scf7180000689563	8115	C	A	ASIC000701-RA:c.214C>A	ASIC000701:p.Arg72Ser	20	58	34.4828	17	40	42.5	0.121474	0.22128	0.655059
203	AS2_scf7180000689563	8187	A	G	ASIC000701-RA:c.286A>G	ASIC000701:p.Lys96Glu	37	54	68.5185	26	44	59.0909	0.1055	0.218212	0.661122
204	AS2_scf7180000689694	8811	T	C	ASIC000729-RA:c.773T>C	ASIC000729:p.Val258Ala	19	48	39.5833	28	41	68.2927	0.00447647	0.0616222	1.21026
205	AS2_scf7180000689694	63943	T	C	ASIC000731-RA:c.2T>C	ASIC000731:p.Met1?	21	40	52.5	11	43	25.5814	0.00781156	0.0794775	1.09976
206	AS2_scf7180000689694	66380	T	G	ASIC000732-RA:c.458T>G	ASIC000732:p.Val153Gly	44	45	97.7778	36	43	83.7209	0.02256	0.129617	0.887339
207	AS2_scf7180000689694	88266	A	G	ASIC000720-RA:c.2039A>G	ASIC000720:p.Asn680Ser	16	48	33.3333	27	47	57.4468	0.0103842	0.0911267	1.04035
208	AS2_scf7180000689694	91487	C	T	ASIC000721-RA:c.2664G>A	ASIC000721:p.Met888Ile	18	62	29.0323	24	58	41.3793	0.0564355	0.185395	0.731901
209	AS2_scf7180000689694	91495	G	A	ASIC000721-RA:c.2656C>T	ASIC000721:p.Arg886Trp	18	60	30	23	57	40.3509	0.0780388	0.203147	0.692189
210	AS2_scf7180000689694	96865	T	A	ASIC000721-RA:c.231A>T	ASIC000721:p.Gln77His	40	51	78.4314	17	47	36.1702	1.87753e-05	0.00486966	2.3125
211	AS2_scf7180000689694	133555	G	C	ASIC000726-RA:c.384G>C	ASIC000726:p.Leu128Phe	26	50	52	23	45	51.1111	0.162135	0.215599	0.666353
212	AS2_scf7180000689694	133563	T	C	ASIC000726-RA:c.392T>C	ASIC000726:p.Leu131Ser	13	50	26	20	42	47.619	0.0176518	0.116632	0.933183
213	AS2_scf7180000689694	141048	G	A	ASIC000727-RA:c.1213G>A	ASIC000727:p.Val405Ile	25	42	59.5238	25	42	59.5238	0.175705	0.209992	0.677796
214	AS2_scf7180000689694	141533	A	G	ASIC000727-RA:c.1630A>G	ASIC000727:p.Ile544Val	25	43	58.1395	28	40	70	0.0976803	0.213667	0.670262
215	AS2_scf7180000689953	572	T	A	ASIC000783-RA:c.40T>A	ASIC000783:p.Phe14Ile	52	64	81.25	68	75	90.6667	0.0551647	0.184863	0.73315
216	AS2_scf7180000689953	842	A	T	ASIC000783-RA:c.310A>T	ASIC000783:p.Ser104Cys	48	54	88.8889	38	41	92.6829	0.234314	0.257617	0.589026
217	AS2_scf7180000689953	845	T	C	ASIC000783-RA:c.313T>C	ASIC000783:p.Cys105Arg	49	52	94.2308	38	41	92.6829	0.309068	0.327063	0.485369
218	AS2_scf7180000689953	882	T	C	ASIC000783-RA:c.350T>C	ASIC000783:p.Ile117Thr	58	59	98.3051	44	48	91.6667	0.10799	0.218601	0.660347
219	AS2_scf7180000689993	13158	T	A	ASIC000798-RA:c.534T>A	ASIC000798:p.His178Gln	60	61	98.3607	53	53	100	0.535088	0.537291	0.269791
220	AS2_scf7180000690005	24330	C	G	ASIC000803-RA:c.7C>G	ASIC000803:p.Pro3Ala	25	46	54.3478	44	56	78.5714	0.00599211	0.0701369	1.15405
221	AS2_scf7180000690005	49222	A	G	ASIC000825-RA:c.305T>C	ASIC000825:p.Met102Thr	30	50	60	30	42	71.4286	0.0917388	0.211785	0.674106
222	AS2_scf7180000690005	71058	C	T	ASIC000858-RA:c.4C>T	ASIC000858:p.Arg2Cys	20	43	46.5116	27	56	48.2143	0.158558	0.217242	0.663056
223	AS2_scf7180000690005	117171	A	G	ASIC000869-RA:c.145A>G	ASIC000869:p.Thr49Ala	13	45	28.8889	24	46	52.1739	0.0135374	0.103365	0.985627
224	AS2_scf7180000690005	193944	G	C	ASIC000806-RA:c.518G>C	ASIC000806:p.Gly173Ala	22	40	55	26	43	60.4651	0.155251	0.219143	0.659273
225	AS2_scf7180000690005	193947	G	A	ASIC000806-RA:c.521G>A	ASIC000806:p.Ser174Asn	21	40	52.5	25	42	59.5238	0.143962	0.22257	0.652533
226	AS2_scf7180000690005	194158	A	G	ASIC000806-RA:c.676A>G	ASIC000806:p.Thr226Ala	24	50	48	23	41	56.0976	0.12492	0.222426	0.652815
227	AS2_scf7180000690005	216943	A	G	ASIC000811-RA:c.280A>G	ASIC000811:p.Met94Val	28	50	56	29	56	51.7857	0.140952	0.223586	0.650555
228	AS2_scf7180000690005	216976	A	C	ASIC000811-RA:c.313A>C	ASIC000811:p.Lys105Gln	25	47	53.1915	30	64	46.875	0.123071	0.22162	0.65439
229	AS2_scf7180000690005	216989	A	G	ASIC000811-RA:c.326A>G	ASIC000811:p.Asn109Ser	20	43	46.5116	33	62	53.2258	0.125541	0.22261	0.652456
230	AS2_scf7180000690005	217187	C	A	ASIC000811-RA:c.524C>A	ASIC000811:p.Ala175Glu	25	40	62.5	30	46	65.2174	0.171866	0.209637	0.678532
231	AS2_scf7180000690005	246864	T	G	ASIC000820-RA:c.2841A>C	ASIC000820:p.Lys947Asn	39	43	90.6977	34	46	73.913	0.0272059	0.139575	0.855194
232	AS2_scf7180000690005	252241	C	G	ASIC000821-RA:c.1723G>C	ASIC000821:p.Ala575Pro	48	53	90.566	39	52	75	0.0227402	0.129921	0.88632
233	AS2_scf7180000690005	252616	A	T	ASIC000821-RA:c.1348T>A	ASIC000821:p.Ser450Thr	19	46	41.3043	27	51	52.9412	0.0846294	0.208448	0.681002
234	AS2_scf7180000690005	252966	C	G	ASIC000821-RA:c.998G>C	ASIC000821:p.Gly333Ala	41	47	87.234	41	41	100	0.0198135	0.122125	0.913196
235	AS2_scf7180000690005	277805	T	C	ASIC000823-RA:c.529A>G	ASIC000823:p.Lys177Glu	46	48	95.8333	33	45	73.3333	0.00218724	0.0431636	1.36488
236	AS2_scf7180000690005	329995	T	G	ASIC000831-RA:c.411A>C	ASIC000831:p.Lys137Asn	22	48	45.8333	18	47	38.2979	0.125469	0.222699	0.652282
237	AS2_scf7180000690005	344237	A	G	ASIC000833-RA:c.1525A>G	ASIC000833:p.Ser509Gly	30	52	57.6923	25	41	60.9756	0.160081	0.216497	0.664548
238	AS2_scf7180000690005	347158	A	C	ASIC000834-RA:c.507T>G	ASIC000834:p.Asn169Lys	28	40	70	35	40	87.5	0.0362223	0.156085	0.80664
239	AS2_scf7180000690005	347318	A	C	ASIC000834-RA:c.347T>G	ASIC000834:p.Val116Gly	34	47	72.3404	30	44	68.1818	0.165263	0.213218	0.671177
240	AS2_scf7180000690005	447332	A	G	ASIC000850-RA:c.798A>G	ASIC000850:p.Ile266Met	22	41	53.6585	30	42	71.4286	0.0454794	0.171664	0.765321
241	AS2_scf7180000690005	447759	T	C	ASIC000850-RA:c.1225T>C	ASIC000850:p.Ser409Pro	39	42	92.8571	39	41	95.122	0.324222	0.341265	0.466909
242	AS2_scf7180000690005	448793	G	A	ASIC000851-RA:c.199G>A	ASIC000851:p.Val67Met	34	44	77.2727	30	42	71.4286	0.161523	0.215875	0.665797
243	AS2_scf7180000690005	476862	G	A	ASIC000857-RA:c.652G>A	ASIC000857:p.Ala218Thr	36	48	75	28	40	70	0.165205	0.213193	0.671227
244	AS2_scf7180000690005	477067	G	C	ASIC000857-RA:c.857G>C	ASIC000857:p.Arg286Pro	41	46	89.1304	39	40	97.5	0.116621	0.220657	0.656282
245	AS2_scf7180000690005	477166	G	C	ASIC000857-RA:c.956G>C	ASIC000857:p.Gly319Ala	36	42	85.7143	62	62	100	0.00345713	0.0540053	1.26756
246	AS2_scf7180000690005	492109	A	C	ASIC000862-RA:c.7023T>G	ASIC000862:p.Asn2341Lys	20	52	38.4615	25	40	62.5	0.0126057	0.0999887	1.00005
247	AS2_scf7180000690005	493519	C	T	ASIC000862-RA:c.5678G>A	ASIC000862:p.Gly1893Asp	15	41	36.5854	17	43	39.5349	0.171082	0.209998	0.677786
248	AS2_scf7180000690005	508162	C	T	ASIC000863-RA:c.1318G>A	ASIC000863:p.Ala440Thr	29	43	67.4419	33	43	76.7442	0.121115	0.221144	0.655324
249	AS2_scf7180000690005	529241	A	C	ASIC000867-RA:c.1211A>C	ASIC000867:p.Gln404Pro	25	56	44.6429	13	50	26	0.0223844	0.12888	0.889814
250	AS2_scf7180000690005	545835	C	T	ASIC000871-RA:c.577G>A	ASIC000871:p.Val193Ile	20	40	50	19	43	44.186	0.151643	0.220724	0.656151
251	AS2_scf7180000690005	545855	T	A	ASIC000871-RA:c.557A>T	ASIC000871:p.His186Leu	21	42	50	15	41	36.5854	0.0832528	0.207592	0.682789
252	AS2_scf7180000690005	546009	A	C	ASIC000871-RA:c.403T>G	ASIC000871:p.Ser135Ala	18	40	45	19	40	47.5	0.172942	0.209432	0.678957
253	AS2_scf7180000690005	546050	A	T	ASIC000871-RA:c.362T>A	ASIC000871:p.Leu121Gln	18	45	40	29	55	52.7273	0.0723767	0.199433	0.700204
254	AS2_scf7180000690005	575776	G	A	ASIC000875-RA:c.524G>A	ASIC000875:p.Ser175Asn	20	52	38.4615	21	51	41.1765	0.153305	0.219988	0.657601
255	AS2_scf7180000690005	575796	A	C	ASIC000875-RA:c.544A>C	ASIC000875:p.Lys182Gln	31	44	70.4545	32	53	60.3774	0.100453	0.21555	0.666453
256	AS2_scf7180000690005	575865	T	A	ASIC000875-RA:c.613T>A	ASIC000875:p.Leu205Ile	35	44	79.5455	37	53	69.8113	0.103913	0.217685	0.662172
257	AS2_scf7180000690005	575875	T	A	ASIC000875-RA:c.623T>A	ASIC000875:p.Leu208His	37	45	82.2222	36	49	73.4694	0.118886	0.221076	0.655458
258	AS2_scf7180000690005	579158	T	G	ASIC000876-RA:c.1019A>C	ASIC000876:p.Gln340Pro	22	50	44	23	43	53.4884	0.109438	0.218849	0.659855
259	AS2_scf7180000690005	597730	G	A	ASIC000881-RA:c.1064C>T	ASIC000881:p.Ala355Val	21	45	46.6667	22	41	53.6585	0.139098	0.223707	0.65032
260	AS2_scf7180000690005	598757	T	C	ASIC000881-RA:c.37A>G	ASIC000881:p.Thr13Ala	33	41	80.4878	38	41	92.6829	0.0727399	0.199324	0.70044
261	AS2_scf7180000690046	5605	A	T	ASIC000897-RA:c.906A>T	ASIC000897:p.Glu302Asp	35	43	81.3953	60	61	98.3607	0.00321951	0.0525018	1.27983
262	AS2_scf7180000690046	7577	G	A	ASIC000897-RA:c.2878G>A	ASIC000897:p.Asp960Asn	31	50	62	30	44	68.1818	0.141679	0.223286	0.651139
263	AS2_scf7180000690046	7617	A	T	ASIC000897-RA:c.2918A>T	ASIC000897:p.Tyr973Phe	14	47	29.7872	21	51	41.1765	0.0849798	0.208588	0.680711
264	AS2_scf7180000690046	7811	A	C	ASIC000897-RA:c.3112A>C	ASIC000897:p.Lys1038Gln	20	40	50	35	45	77.7778	0.00525714	0.0667457	1.17558
265	AS2_scf7180000690046	7856	T	C	ASIC000897-RA:c.3157T>C	ASIC000897:p.Cys1053Arg	12	46	26.087	25	50	50	0.00946763	0.0869596	1.06068
266	AS2_scf7180000690046	9927	G	C	ASIC000898-RA:c.235G>C	ASIC000898:p.Glu79Gln	34	45	75.5556	27	50	54	0.0159096	0.111668	0.952072
267	AS2_scf7180000690046	9946	A	C	ASIC000898-RA:c.254A>C	ASIC000898:p.Gln85Pro	34	47	72.3404	25	43	58.1395	0.0656889	0.193817	0.712609
268	AS2_scf7180000690046	10237	G	A	ASIC000898-RA:c.545G>A	ASIC000898:p.Ser182Asn	21	45	46.6667	22	44	50	0.159901	0.216613	0.664316
269	AS2_scf7180000690046	10354	A	G	ASIC000898-RA:c.662A>G	ASIC000898:p.Asn221Ser	27	42	64.2857	31	44	70.4545	0.151532	0.2207	0.656198
270	AS2_scf7180000690046	11749	T	A	ASIC000898-RA:c.1873T>A	ASIC000898:p.Ser625Thr	45	45	100	43	49	87.7551	0.0171746	0.115582	0.937111
271	AS2_scf7180000690046	11786	C	A	ASIC000898-RA:c.1910C>A	ASIC000898:p.Ala637Asp	38	41	92.6829	29	48	60.4167	0.000305531	0.0170388	1.76856
272	AS2_scf7180000690046	12377	A	C	ASIC000898-RA:c.2307A>C	ASIC000898:p.Gln769His	28	42	66.6667	31	52	59.6154	0.13375	0.222984	0.651726
273	AS2_scf7180000690046	12487	T	C	ASIC000898-RA:c.2417T>C	ASIC000898:p.Val806Ala	37	40	92.5	49	50	98	0.193332	0.22239	0.652885
274	AS2_scf7180000690046	16219	T	A	ASIC000899-RA:c.661T>A	ASIC000899:p.Ser221Thr	31	46	67.3913	37	51	72.549	0.1508	0.221132	0.655348
275	AS2_scf7180000690046	16249	C	A	ASIC000899-RA:c.691C>A	ASIC000899:p.His231Asn	26	43	60.4651	30	51	58.8235	0.164859	0.213794	0.670005
276	AS2_scf7180000690046	18242	T	C	ASIC000899-RA:c.1448T>C	ASIC000899:p.Val483Ala	46	47	97.8723	42	42	100	0.52809	0.531309	0.274653
277	AS2_scf7180000690089	2052	T	C	ASIC000906-RA:c.536A>G	ASIC000906:p.Gln179Arg	64	87	73.5632	74	104	71.1538	0.120632	0.220904	0.655796
278	AS2_scf7180000690089	2074	G	A	ASIC000906-RA:c.514C>T	ASIC000906:p.Leu172Phe	63	104	60.5769	67	120	55.8333	0.0837051	0.207895	0.682156
279	AS2_scf7180000690089	2137	G	A	ASIC000906-RA:c.451C>T	ASIC000906:p.Pro151Ser	24	61	39.3443	34	74	45.9459	0.103529	0.217214	0.663112
280	AS2_scf7180000690089	2241	C	G	ASIC000906-RA:c.347G>C	ASIC000906:p.Gly116Ala	69	73	94.5205	51	56	91.0714	0.202885	0.230266	0.63777
281	AS2_scf7180000690089	2322	C	G	ASIC000906-RA:c.266G>C	ASIC000906:p.Gly89Ala	25	45	55.5556	21	40	52.5	0.165806	0.212959	0.671703
282	AS2_scf7180000690089	2539	A	G	ASIC000906-RA:c.49T>C	ASIC000906:p.Cys17Arg	52	56	92.8571	48	58	82.7586	0.0613026	0.190797	0.719428
283	AS2_scf7180000690089	2729	C	A	ASIC000907-RA:c.358G>T	ASIC000907:p.Ala120Ser	41	78	52.5641	47	91	51.6484	0.121825	0.221279	0.655059
284	AS2_scf7180000690089	2926	A	G	ASIC000907-RA:c.161T>C	ASIC000907:p.Phe54Ser	37	105	35.2381	46	115	40	0.0852269	0.208443	0.681013
285	AS2_scf7180000690089	3238	G	T	ASIC000907-RA:c.46C>A	ASIC000907:p.Pro16Thr	100	135	74.0741	99	138	71.7391	0.0986431	0.214425	0.668726
286	AS2_scf7180000690135	5358	G	A	ASIC000925-RA:c.481G>A	ASIC000925:p.Val161Met	19	47	40.4255	17	43	39.5349	0.16975	0.210656	0.676426
287	AS2_scf7180000690135	5459	G	T	ASIC000925-RA:c.582G>T	ASIC000925:p.Glu194Asp	39	96	40.625	38	86	44.186	0.106192	0.218317	0.660912
288	AS2_scf7180000690135	5920	A	G	ASIC000926-RA:c.188A>G	ASIC000926:p.Asn63Ser	40	45	88.8889	40	50	80	0.113705	0.219875	0.657824
289	AS2_scf7180000690135	5926	A	G	ASIC000926-RA:c.194A>G	ASIC000926:p.Lys65Arg	45	50	90	38	48	79.1667	0.0758478	0.201423	0.695892
290	AS2_scf7180000690255	31475	G	A	ASIC000949-RA:c.275G>A	ASIC000949:p.Trp92*	69	179	38.5475	72	178	40.4494	0.0805936	0.205156	0.687915
291	AS2_scf7180000690255	31528	C	T	ASIC000949-RA:c.328C>T	ASIC000949:p.Arg110Cys	58	173	33.526	62	167	37.1257	0.0710749	0.198388	0.702484
292	AS2_scf7180000690255	34614	T	A	ASIC000966-RA:c.369A>T	ASIC000966:p.Leu123Phe	200	214	93.4579	146	152	96.0526	0.107923	0.218601	0.660348
293	AS2_scf7180000690255	51050	T	C	ASIC000969-RA:c.316A>G	ASIC000969:p.Ile106Val	19	40	47.5	30	40	75	0.00777727	0.0797244	1.09841
294	AS2_scf7180000690255	77075	A	T	ASIC000950-RA:c.175T>A	ASIC000950:p.Ser59Thr	17	46	36.9565	18	50	36	0.167067	0.212029	0.673604
295	AS2_scf7180000690255	100751	G	A	ASIC000953-RA:c.2128G>A	ASIC000953:p.Ala710Thr	20	47	42.5532	20	51	39.2157	0.153995	0.219571	0.658426
296	AS2_scf7180000690255	106345	A	G	ASIC000953-RA:c.2932A>G	ASIC000953:p.Ser978Gly	44	44	100	43	44	97.7273	0.5	0.511232	0.291382
297	AS2_scf7180000690255	144123	A	C	ASIC000955-RA:c.1952A>C	ASIC000955:p.Gln651Pro	15	53	28.3019	32	48	66.6667	8.92652e-05	0.00999037	2.00042
298	AS2_scf7180000690255	144129	C	G	ASIC000955-RA:c.1958C>G	ASIC000955:p.Ala653Gly	13	48	27.0833	33	49	67.3469	5.73149e-05	0.00851387	2.06987
299	AS2_scf7180000690255	171767	C	T	ASIC000956-RA:c.1385C>T	ASIC000956:p.Thr462Met	19	50	38	14	44	31.8182	0.141679	0.223264	0.651181
300	AS2_scf7180000690255	171822	T	G	ASIC000956-RA:c.1440T>G	ASIC000956:p.Asp480Glu	32	48	66.6667	40	40	100	1.55751e-05	0.0047129	2.32671
301	AS2_scf7180000690255	172132	T	A	ASIC000956-RA:c.1750T>A	ASIC000956:p.Cys584Ser	46	47	97.8723	46	48	95.8333	0.383022	0.400037	0.3979
302	AS2_scf7180000690255	176833	A	G	ASIC000958-RA:c.1421T>C	ASIC000958:p.Val474Ala	28	47	59.5745	31	48	64.5833	0.147812	0.221664	0.654305
303	AS2_scf7180000690255	176857	G	T	ASIC000958-RA:c.1397C>A	ASIC000958:p.Ala466Glu	34	55	61.8182	31	49	63.2653	0.158867	0.216957	0.663627
304	AS2_scf7180000690255	176887	G	C	ASIC000958-RA:c.1367C>G	ASIC000958:p.Thr456Arg	37	53	69.8113	38	54	70.3704	0.166669	0.212282	0.673086
305	AS2_scf7180000690255	176925	T	A	ASIC000958-RA:c.1329A>T	ASIC000958:p.Leu443Phe	7	47	14.8936	28	51	54.902	2.68969e-05	0.00619008	2.2083
306	AS2_scf7180000690255	177022	T	G	ASIC000958-RA:c.1232A>C	ASIC000958:p.Glu411Ala	32	44	72.7273	34	49	69.3878	0.170271	0.210281	0.6772
307	AS2_scf7180000690255	177044	G	T	ASIC000958-RA:c.1210C>A	ASIC000958:p.Pro404Thr	13	44	29.5455	24	53	45.283	0.0481666	0.17619	0.754018
308	AS2_scf7180000690255	187888	C	A	ASIC000961-RA:c.1034G>T	ASIC000961:p.Arg345Met	30	52	57.6923	31	54	57.4074	0.155614	0.218899	0.659755
309	AS2_scf7180000690255	191018	A	G	ASIC000962-RA:c.49A>G	ASIC000962:p.Thr17Ala	31	40	77.5	35	40	87.5	0.119302	0.221396	0.654831
310	AS2_scf7180000690279	119338	G	A	ASIC000984-RA:c.589G>A	ASIC000984:p.Ala197Thr	35	49	71.4286	24	49	48.9796	0.0128073	0.100563	0.997562
311	AS2_scf7180000690353	3420	T	G	ASIC000996-RA:c.171A>C	ASIC000996:p.Glu57Asp	79	96	82.2917	93	113	82.3009	0.144049	0.222682	0.652314
312	AS2_scf7180000690353	3457	T	C	ASIC000996-RA:c.134A>G	ASIC000996:p.His45Arg	177	186	95.1613	183	201	91.0448	0.046031	0.172313	0.763682
313	AS2_scf7180000690353	3487	T	A	ASIC000996-RA:c.104A>T	ASIC000996:p.Tyr35Phe	143	156	91.6667	124	150	82.6667	0.00854652	0.0826332	1.08285
314	AS2_scf7180000690353	3506	T	A	ASIC000996-RA:c.85A>T	ASIC000996:p.Thr29Ser	105	119	88.2353	88	118	74.5763	0.00344128	0.0540159	1.26748
315	AS2_scf7180000690427	22923	C	T	ASIC001032-RA:c.785G>A	ASIC001032:p.Ser262Asn	40	42	95.2381	48	52	92.3077	0.28628	0.304764	0.516037
316	AS2_scf7180000690427	23158	C	T	ASIC001032-RA:c.550G>A	ASIC001032:p.Ala184Thr	18	54	33.3333	23	42	54.7619	0.0185468	0.119079	0.924166
317	AS2_scf7180000690427	23293	T	A	ASIC001032-RA:c.415A>T	ASIC001032:p.Thr139Ser	23	46	50	23	47	48.9362	0.163319	0.214814	0.667937
318	AS2_scf7180000690427	28448	T	A	ASIC001033-RA:c.565A>T	ASIC001033:p.Ser189Cys	22	43	51.1628	18	41	43.9024	0.139152	0.223684	0.650365
319	AS2_scf7180000690427	31428	A	C	ASIC001034-RA:c.165T>G	ASIC001034:p.His55Gln	27	40	67.5	21	47	44.6809	0.0181451	0.117889	0.928526
320	AS2_scf7180000690427	31463	G	A	ASIC001034-RA:c.130C>T	ASIC001034:p.Pro44Ser	17	40	42.5	12	40	30	0.0949961	0.213395	0.670816
321	AS2_scf7180000690427	36322	A	C	ASIC001036-RA:c.846A>C	ASIC001036:p.Glu282Asp	17	44	38.6364	21	46	45.6522	0.13532	0.223323	0.651066
322	AS2_scf7180000690427	36416	G	A	ASIC001036-RA:c.940G>A	ASIC001036:p.Ala314Thr	41	42	97.619	50	52	96.1538	0.415476	0.431725	0.364793
323	AS2_scf7180000690427	67422	C	A	ASIC001038-RA:c.992C>A	ASIC001038:p.Pro331Gln	38	40	95	40	40	100	0.246835	0.268994	0.570258
324	AS2_scf7180000690427	89686	A	C	ASIC001024-RA:c.205A>C	ASIC001024:p.Ile69Leu	18	40	45	21	58	36.2069	0.113728	0.219763	0.658044
325	AS2_scf7180000690427	123910	A	T	ASIC001026-RA:c.94T>A	ASIC001026:p.Phe32Ile	33	46	71.7391	25	46	54.3478	0.0394235	0.162017	0.790439
326	AS2_scf7180000690427	127023	C	A	ASIC001027-RA:c.374C>A	ASIC001027:p.Thr125Asn	19	40	47.5	12	43	27.907	0.0338501	0.152246	0.817453
327	AS2_scf7180000690427	127286	A	G	ASIC001027-RA:c.637A>G	ASIC001027:p.Thr213Ala	22	54	40.7407	13	41	31.7073	0.114471	0.219873	0.657829
328	AS2_scf7180000690427	128134	G	T	ASIC001027-RA:c.1485G>T	ASIC001027:p.Glu495Asp	26	42	61.9048	22	44	50	0.0938931	0.213144	0.671326
329	AS2_scf7180000690427	128174	T	G	ASIC001027-RA:c.1525T>G	ASIC001027:p.Leu509Val	47	51	92.1569	43	46	93.4783	0.295299	0.313588	0.50364
330	AS2_scf7180000690427	144880	T	C	ASIC001031-RA:c.425T>C	ASIC001031:p.Val142Ala	28	57	49.1228	19	44	43.1818	0.134148	0.223147	0.651409
331	AS2_scf7180000690427	145054	C	A	ASIC001031-RA:c.599C>A	ASIC001031:p.Thr200Asn	18	43	41.8605	23	44	52.2727	0.10693	0.218322	0.660902
332	AS2_scf7180000690427	145117	A	G	ASIC001031-RA:c.662A>G	ASIC001031:p.Asp221Gly	19	51	37.2549	18	44	40.9091	0.156253	0.218668	0.660215
333	AS2_scf7180000690428	6504	C	A	ASIC001040-RA:c.1756C>A	ASIC001040:p.Pro586Thr	29	47	61.7021	31	44	70.4545	0.120034	0.221422	0.654779
334	AS2_scf7180000690428	6555	G	A	ASIC001040-RA:c.1807G>A	ASIC001040:p.Ala603Thr	21	41	51.2195	26	44	59.0909	0.133041	0.222803	0.652079
335	AS2_scf7180000690428	7600	C	T	ASIC001040-RA:c.2852C>T	ASIC001040:p.Ala951Val	24	48	50	11	41	26.8293	0.014722	0.10744	0.968834
336	AS2_scf7180000690428	43886	G	C	ASIC001052-RA:c.2091G>C	ASIC001052:p.Gln697His	25	44	56.8182	19	60	31.6667	0.00618712	0.0715989	1.14509
337	AS2_scf7180000690428	43909	A	G	ASIC001052-RA:c.2114A>G	ASIC001052:p.Gln705Arg	46	51	90.1961	38	47	80.8511	0.0981075	0.214086	0.669412
338	AS2_scf7180000690428	52621	G	T	ASIC001054-RA:c.1327G>T	ASIC001054:p.Ala443Ser	24	42	57.1429	34	48	70.8333	0.0710191	0.1983	0.702677
339	AS2_scf7180000690428	81029	G	C	ASIC001041-RA:c.29G>C	ASIC001041:p.Cys10Ser	16	43	37.2093	23	42	54.7619	0.0472047	0.174666	0.757792
340	AS2_scf7180000690428	81931	A	T	ASIC001041-RA:c.496A>T	ASIC001041:p.Thr166Ser	30	51	58.8235	38	51	74.5098	0.0415129	0.165323	0.781667
341	AS2_scf7180000690428	81943	C	A	ASIC001041-RA:c.508C>A	ASIC001041:p.His170Asn	25	47	53.1915	23	47	48.9362	0.150254	0.221164	0.655285
342	AS2_scf7180000690428	81967	T	C	ASIC001041-RA:c.532T>C	ASIC001041:p.Ser178Pro	42	42	100	41	50	82	0.00288394	0.0496037	1.30449
343	AS2_scf7180000690428	82012	T	C	ASIC001041-RA:c.577T>C	ASIC001041:p.Ser193Pro	33	40	82.5	30	42	71.4286	0.104596	0.218025	0.661494
344	AS2_scf7180000690428	84123	C	T	ASIC001041-RA:c.1609C>T	ASIC001041:p.Pro537Ser	16	41	39.0244	18	44	40.9091	0.172508	0.209482	0.678854
345	AS2_scf7180000690428	84129	T	C	ASIC001041-RA:c.1615T>C	ASIC001041:p.Tyr539His	18	41	43.9024	27	48	56.25	0.0868747	0.208786	0.680299
346	AS2_scf7180000690428	84180	A	G	ASIC001041-RA:c.1666A>G	ASIC001041:p.Asn556Asp	38	42	90.4762	39	50	78	0.0638162	0.19296	0.714532
347	AS2_scf7180000690428	84183	C	T	ASIC001041-RA:c.1669C>T	ASIC001041:p.His557Tyr	43	43	100	43	48	89.5833	0.0368202	0.156718	0.80488
348	AS2_scf7180000690428	84204	G	A	ASIC001041-RA:c.1690G>A	ASIC001041:p.Asp564Asn	45	45	100	38	41	92.6829	0.104163	0.217844	0.661854
349	AS2_scf7180000690428	89849	G	T	ASIC001043-RA:c.361G>T	ASIC001043:p.Ala121Ser	33	45	73.3333	35	49	71.4286	0.17863	0.211447	0.674799
350	AS2_scf7180000690428	89866	A	T	ASIC001043-RA:c.378A>T	ASIC001043:p.Glu126Asp	33	43	76.7442	39	53	73.5849	0.176587	0.21034	0.677079
351	AS2_scf7180000690428	90275	G	A	ASIC001043-RA:c.787G>A	ASIC001043:p.Ala263Thr	23	52	44.2308	21	40	52.5	0.122904	0.22171	0.654215
352	AS2_scf7180000690428	103954	T	G	ASIC001045-RA:c.22T>G	ASIC001045:p.Phe8Val	15	43	34.8837	19	42	45.2381	0.110053	0.219034	0.659489
353	AS2_scf7180000690428	113821	T	G	ASIC001047-RA:c.73T>G	ASIC001047:p.Tyr25Asp	34	44	77.2727	41	41	100	0.000792946	0.0268255	1.57145
354	AS2_scf7180000690428	113825	A	C	ASIC001047-RA:c.77A>C	ASIC001047:p.Lys26Thr	35	44	79.5455	40	40	100	0.00192573	0.0407595	1.38977
355	AS2_scf7180000690428	113827	G	A	ASIC001047-RA:c.79G>A	ASIC001047:p.Glu27Lys	25	46	54.3478	22	40	55	0.171423	0.209785	0.678225
356	AS2_scf7180000690442	666	G	C	ASIC001058-RA:c.27G>C	ASIC001058:p.Lys9Asn	16	44	36.3636	28	50	56	0.0274982	0.14015	0.853407
357	AS2_scf7180000690442	859	T	A	ASIC001058-RA:c.220T>A	ASIC001058:p.Cys74Ser	28	49	57.1429	31	58	53.4483	0.143895	0.222592	0.65249
358	AS2_scf7180000690442	936	C	G	ASIC001058-RA:c.241C>G	ASIC001058:p.Arg81Gly	35	44	79.5455	52	68	76.4706	0.172505	0.209493	0.67883
359	AS2_scf7180000690442	990	C	A	ASIC001058-RA:c.295C>A	ASIC001058:p.Gln99Lys	24	42	57.1429	28	58	48.2759	0.110295	0.219328	0.658905
360	AS2_scf7180000690442	1041	A	G	ASIC001058-RA:c.346A>G	ASIC001058:p.Asn116Asp	16	40	40	29	47	61.7021	0.0228969	0.130315	0.885004
361	AS2_scf7180000690442	1048	C	G	ASIC001058-RA:c.353C>G	ASIC001058:p.Ala118Gly	17	42	40.4762	30	48	62.5	0.0195772	0.121817	0.914293
362	AS2_scf7180000690442	1071	T	C	ASIC001058-RA:c.376T>C	ASIC001058:p.*126Gln	38	54	70.3704	36	47	76.5957	0.140399	0.223772	0.650194
363	AS2_scf7180000690467	27173	T	G	ASIC001068-RA:c.27T>G	ASIC001068:p.Asp9Glu	53	80	66.25	61	78	78.2051	0.0351852	0.154177	0.81198
364	AS2_scf7180000690467	27175	A	G	ASIC001068-RA:c.29A>G	ASIC001068:p.Tyr10Cys	53	81	65.4321	61	78	78.2051	0.0288073	0.142943	0.844837
365	AS2_scf7180000690467	28889	T	A	ASIC001069-RA:c.68T>A	ASIC001069:p.Val23Glu	28	44	63.6364	29	42	69.0476	0.157282	0.218314	0.660919
366	AS2_scf7180000690470	37107	A	T	ASIC001079-RA:c.5239T>A	ASIC001079:p.Ser1747Thr	45	63	71.4286	44	62	70.9677	0.156132	0.218668	0.660215
367	AS2_scf7180000690470	37228	G	T	ASIC001079-RA:c.5118C>A	ASIC001079:p.Asp1706Glu	24	58	41.3793	23	55	41.8182	0.151119	0.220729	0.656141
368	AS2_scf7180000690470	37231	T	A	ASIC001079-RA:c.5115A>T	ASIC001079:p.Glu1705Asp	24	57	42.1053	23	52	44.2308	0.149626	0.221417	0.654789
369	AS2_scf7180000690470	37241	T	G	ASIC001079-RA:c.5105A>C	ASIC001079:p.Asn1702Thr	35	40	87.5	30	44	68.1818	0.0228983	0.130233	0.885281
370	AS2_scf7180000690470	37245	G	A	ASIC001079-RA:c.5101C>T	ASIC001079:p.Pro1701Ser	24	43	55.814	25	51	49.0196	0.132821	0.223121	0.651459
371	AS2_scf7180000690470	37382	A	T	ASIC001079-RA:c.4964T>A	ASIC001079:p.Val1655Glu	42	78	53.8462	57	79	72.1519	0.00795826	0.080122	1.09625
372	AS2_scf7180000690470	37488	C	G	ASIC001079-RA:c.4858G>C	ASIC001079:p.Val1620Leu	28	58	48.2759	29	50	58	0.0928652	0.212643	0.67235
373	AS2_scf7180000690470	37658	G	C	ASIC001079-RA:c.4688C>G	ASIC001079:p.Ala1563Gly	15	42	35.7143	19	47	40.4255	0.156236	0.218663	0.660225
374	AS2_scf7180000690470	41954	T	C	ASIC001079-RA:c.1598A>G	ASIC001079:p.Glu533Gly	46	47	97.8723	54	55	98.1818	0.501844	0.511613	0.291058
375	AS2_scf7180000690470	42038	T	C	ASIC001079-RA:c.1514A>G	ASIC001079:p.Glu505Gly	18	53	33.9623	23	58	39.6552	0.129237	0.222406	0.652854
376	AS2_scf7180000690470	42114	C	T	ASIC001079-RA:c.1438G>A	ASIC001079:p.Val480Ile	42	54	77.7778	38	51	74.5098	0.167701	0.211715	0.674247
377	AS2_scf7180000690470	42641	G	A	ASIC001079-RA:c.911C>T	ASIC001079:p.Ser304Leu	23	51	45.098	18	55	32.7273	0.0682466	0.195606	0.708618
378	AS2_scf7180000690470	42654	G	T	ASIC001079-RA:c.898C>A	ASIC001079:p.His300Asn	21	47	44.6809	20	53	37.7358	0.12626	0.222436	0.652794
379	AS2_scf7180000690470	42657	G	T	ASIC001079-RA:c.895C>A	ASIC001079:p.Gln299Lys	21	46	45.6522	21	56	37.5	0.11371	0.219859	0.657856
380	AS2_scf7180000690470	42752	A	G	ASIC001079-RA:c.800T>C	ASIC001079:p.Ile267Thr	32	52	61.5385	29	57	50.8772	0.0826617	0.207034	0.683957
381	AS2_scf7180000690470	43206	G	A	ASIC001079-RA:c.346C>T	ASIC001079:p.Pro116Ser	27	52	51.9231	22	50	44	0.114628	0.219658	0.658253
382	AS2_scf7180000690470	52234	C	T	ASIC001085-RA:c.917G>A	ASIC001085:p.Arg306Lys	23	40	57.5	23	50	46	0.0943872	0.213406	0.670793
383	AS2_scf7180000690470	52827	C	A	ASIC001085-RA:c.324G>T	ASIC001085:p.Glu108Asp	24	40	60	23	43	53.4884	0.147213	0.22209	0.653471
384	AS2_scf7180000690470	58381	G	C	ASIC001072-RA:c.853G>C	ASIC001072:p.Glu285Gln	26	51	50.9804	22	52	42.3077	0.106765	0.218231	0.661083
385	AS2_scf7180000690470	58487	G	C	ASIC001072-RA:c.959G>C	ASIC001072:p.Gly320Ala	15	44	34.0909	29	51	56.8627	0.0143234	0.106335	0.973322
386	AS2_scf7180000690470	59029	G	T	ASIC001072-RA:c.1501G>T	ASIC001072:p.Ala501Ser	48	54	88.8889	38	46	82.6087	0.152515	0.220305	0.656976
387	AS2_scf7180000690470	59185	A	G	ASIC001072-RA:c.1657A>G	ASIC001072:p.Asn553Asp	27	46	58.6957	32	48	66.6667	0.12345	0.221789	0.65406
388	AS2_scf7180000690474	1826	C	A	ASIC001089-RA:c.779C>A	ASIC001089:p.Ala260Glu	92	211	43.6019	78	203	38.4236	0.0449893	0.1708	0.767511
389	AS2_scf7180000690474	26643	T	C	ASIC001091-RA:c.737A>G	ASIC001091:p.Tyr246Cys	352	370	95.1351	287	305	94.0984	0.113749	0.219778	0.658015
390	AS2_scf7180000690474	28492	C	T	ASIC001092-RA:c.17C>T	ASIC001092:p.Thr6Met	35	45	77.7778	36	48	75	0.183669	0.21492	0.667723
391	AS2_scf7180000690474	28503	T	G	ASIC001092-RA:c.28T>G	ASIC001092:p.Tyr10Asp	40	40	100	42	43	97.6744	0.518072	0.522743	0.281712
392	AS2_scf7180000690521	17556	A	G	ASIC001102-RA:c.320A>G	ASIC001102:p.Gln107Arg	23	40	57.5	29	45	64.4444	0.142648	0.223221	0.651265
393	AS2_scf7180000690521	17641	A	C	ASIC001102-RA:c.405A>C	ASIC001102:p.Glu135Asp	20	45	44.4444	19	43	44.186	0.169736	0.210704	0.676328
394	AS2_scf7180000690521	17643	A	G	ASIC001102-RA:c.407A>G	ASIC001102:p.His136Arg	20	45	44.4444	19	43	44.186	0.169736	0.210688	0.676361
395	AS2_scf7180000690521	17649	T	A	ASIC001102-RA:c.413T>A	ASIC001102:p.Ile138Asn	25	50	50	24	47	51.0638	0.160001	0.216622	0.664297
396	AS2_scf7180000690521	17668	A	G	ASIC001102-RA:c.432A>G	ASIC001102:p.*144Trp	23	43	53.4884	24	50	48	0.143637	0.222742	0.652198
397	AS2_scf7180000690580	138	C	A	ASIC001114-RA:c.27C>A	ASIC001114:p.Phe9Leu	36	42	85.7143	28	40	70	0.0500852	0.178883	0.74743
398	AS2_scf7180000690675	119869	T	A	ASIC001146-RA:c.95A>T	ASIC001146:p.Gln32Leu	32	50	64	41	48	85.4167	0.00977704	0.0886061	1.05254
399	AS2_scf7180000690675	136737	A	T	ASIC001147-RA:c.122T>A	ASIC001147:p.Leu41Gln	44	50	88	30	41	73.1707	0.0436916	0.169216	0.77156
400	AS2_scf7180000690675	155508	G	A	ASIC001149-RA:c.65G>A	ASIC001149:p.Arg22His	28	60	46.6667	22	47	46.8085	0.154618	0.219502	0.658562
401	AS2_scf7180000690675	156011	A	G	ASIC001149-RA:c.325A>G	ASIC001149:p.Ser109Gly	38	46	82.6087	34	43	79.0698	0.194142	0.223007	0.651681
402	AS2_scf7180000690675	190535	G	A	ASIC001141-RA:c.344C>T	ASIC001141:p.Ser115Phe	30	50	60	35	46	76.087	0.0429985	0.167724	0.775405
403	AS2_scf7180000690756	680	A	G	ASIC001177-RA:c.206A>G	ASIC001177:p.Gln69Arg	55	105	52.381	31	99	31.3131	0.00109688	0.0302753	1.51891
404	AS2_scf7180000690756	931	G	T	ASIC001177-RA:c.457G>T	ASIC001177:p.Gly153Cys	57	100	57	27	84	32.1429	0.000397346	0.0195561	1.70872
405	AS2_scf7180000690756	935	G	C	ASIC001177-RA:c.461G>C	ASIC001177:p.Gly154Ala	57	97	58.7629	27	80	33.75	0.000489531	0.0213305	1.671
406	AS2_scf7180000690756	1004	A	T	ASIC001177-RA:c.530A>T	ASIC001177:p.Gln177Leu	259	290	89.3103	189	223	84.7534	0.0328085	0.15025	0.823186
407	AS2_scf7180000690756	1021	G	C	ASIC001177-RA:c.547G>C	ASIC001177:p.Glu183Gln	409	414	98.7923	311	314	99.0446	0.268535	0.288238	0.540248
408	AS2_scf7180000690781	15490	G	T	ASIC001202-RA:c.7187G>T	ASIC001202:p.Gly2396Val	14	43	32.5581	21	42	50	0.0470646	0.174503	0.758196
409	AS2_scf7180000690781	19075	C	A	ASIC001202-RA:c.9045C>A	ASIC001202:p.His3015Gln	32	59	54.2373	24	50	48	0.123848	0.222064	0.653522
410	AS2_scf7180000690781	22720	G	T	ASIC001202-RA:c.11664G>T	ASIC001202:p.Gln3888His	11	42	26.1905	25	45	55.5556	0.00371451	0.0560953	1.25107
411	AS2_scf7180000690781	28458	T	A	ASIC001203-RA:c.88A>T	ASIC001203:p.Ile30Phe	32	40	80	37	44	84.0909	0.198979	0.226905	0.644156
412	AS2_scf7180000690781	32325	G	A	ASIC001205-RA:c.907C>T	ASIC001205:p.Pro303Ser	17	48	35.4167	20	48	41.6667	0.136726	0.223589	0.650549
413	AS2_scf7180000690781	165936	T	A	ASIC001190-RA:c.849A>T	ASIC001190:p.Gln283His	13	40	32.5	20	44	45.4545	0.0861188	0.208471	0.680954
414	AS2_scf7180000690781	166423	G	A	ASIC001190-RA:c.362C>T	ASIC001190:p.Thr121Ile	15	42	35.7143	41	56	73.2143	0.000169947	0.0130373	1.88481
415	AS2_scf7180000690781	166662	G	C	ASIC001190-RA:c.193C>G	ASIC001190:p.Leu65Val	16	41	39.0244	21	40	52.5	0.085407	0.208478	0.68094
416	AS2_scf7180000690781	194755	G	A	ASIC001197-RA:c.986G>A	ASIC001197:p.Ser329Asn	21	49	42.8571	18	46	39.1304	0.154548	0.219554	0.658459
417	AS2_scf7180000690781	194786	C	G	ASIC001197-RA:c.1017C>G	ASIC001197:p.Ser339Arg	33	47	70.2128	32	43	74.4186	0.169213	0.210742	0.676249
418	AS2_scf7180000690943	862	A	T	ASIC001256-RA:c.204T>A	ASIC001256:p.Phe68Leu	30	48	62.5	31	47	65.9574	0.159406	0.216822	0.663896
419	AS2_scf7180000690943	893	T	A	ASIC001256-RA:c.173A>T	ASIC001256:p.Asp58Val	23	56	41.0714	27	59	45.7627	0.131469	0.222404	0.652857
420	AS2_scf7180000691050	10885	T	C	ASIC001275-RA:c.1256A>G	ASIC001275:p.Lys419Arg	72	94	76.5957	84	100	84	0.0625076	0.191952	0.716808
421	AS2_scf7180000691050	11326	T	C	ASIC001275-RA:c.815A>G	ASIC001275:p.Glu272Gly	34	70	48.5714	43	88	48.8636	0.127128	0.222715	0.65225
422	AS2_scf7180000691050	11485	A	G	ASIC001275-RA:c.656T>C	ASIC001275:p.Val219Ala	50	89	56.1798	42	88	47.7273	0.0638603	0.192986	0.714474
423	AS2_scf7180000691050	11488	A	G	ASIC001275-RA:c.653T>C	ASIC001275:p.Ile218Thr	51	90	56.6667	46	92	50	0.0789869	0.203412	0.691624
424	AS2_scf7180000691050	11623	A	T	ASIC001275-RA:c.518T>A	ASIC001275:p.Leu173Gln	58	81	71.6049	65	84	77.381	0.0991552	0.214966	0.667631
425	AS2_scf7180000691050	11837	G	C	ASIC001275-RA:c.304C>G	ASIC001275:p.Arg102Gly	34	71	47.8873	51	102	50	0.118345	0.221077	0.655457
426	AS2_scf7180000691050	11915	T	C	ASIC001275-RA:c.226A>G	ASIC001275:p.Thr76Ala	31	79	39.2405	47	102	46.0784	0.079142	0.203586	0.691251
427	AS2_scf7180000691050	11932	A	G	ASIC001275-RA:c.209T>C	ASIC001275:p.Val70Ala	30	78	38.4615	51	109	46.789	0.0631157	0.192444	0.715695
428	AS2_scf7180000691115	17628	T	C	ASIC001291-RA:c.978A>G	ASIC001291:p.*326Trp	83	88	94.3182	71	76	93.4211	0.246864	0.268936	0.570352
429	AS2_scf7180000691115	18253	C	T	ASIC001291-RA:c.353G>A	ASIC001291:p.Ser118Asn	71	109	65.1376	64	108	59.2593	0.0749777	0.200941	0.696932
430	AS2_scf7180000691397	49878	A	T	ASIC001363-RA:c.671A>T	ASIC001363:p.Asp224Val	38	47	80.8511	27	43	62.7907	0.0311149	0.146899	0.832981
431	AS2_scf7180000691397	97069	C	T	ASIC001350-RA:c.1288G>A	ASIC001350:p.Asp430Asn	22	50	44	27	48	56.25	0.0777304	0.202959	0.692593
432	AS2_scf7180000691397	97096	C	A	ASIC001350-RA:c.1261G>T	ASIC001350:p.Val421Leu	22	46	47.8261	23	46	50	0.161582	0.215848	0.665853
433	AS2_scf7180000691397	97242	G	A	ASIC001350-RA:c.1115C>T	ASIC001350:p.Ser372Leu	30	41	73.1707	29	49	59.1837	0.0685747	0.195894	0.70798
434	AS2_scf7180000691397	98204	T	A	ASIC001350-RA:c.220A>T	ASIC001350:p.Ser74Cys	25	45	55.5556	22	62	35.4839	0.0190851	0.120405	0.919354
435	AS2_scf7180000691397	137554	G	A	ASIC001354-RA:c.85C>T	ASIC001354:p.Arg29Cys	28	55	50.9091	24	42	57.1429	0.135677	0.223394	0.650928
436	AS2_scf7180000691397	137629	G	C	ASIC001354-RA:c.10C>G	ASIC001354:p.Arg4Gly	12	43	27.907	22	43	51.1628	0.0158612	0.111712	0.9519
437	AS2_scf7180000691413	1161	C	T	ASIC001374-RA:c.781G>A	ASIC001374:p.Glu261Lys	21	57	36.8421	19	56	33.9286	0.148023	0.221756	0.654125
438	AS2_scf7180000691413	1220	C	T	ASIC001374-RA:c.722G>A	ASIC001374:p.Arg241Lys	53	63	84.127	25	41	60.9756	0.00584181	0.0698793	1.15565
439	AS2_scf7180000691413	1222	C	G	ASIC001374-RA:c.720G>C	ASIC001374:p.Gln240His	46	65	70.7692	23	44	52.2727	0.0239803	0.132826	0.876716
440	AS2_scf7180000691413	1313	C	A	ASIC001374-RA:c.629G>T	ASIC001374:p.Arg210Leu	44	44	100	41	43	95.3488	0.241379	0.26384	0.57866
441	AS2_scf7180000691413	1316	A	G	ASIC001374-RA:c.626T>C	ASIC001374:p.Leu209Pro	15	45	33.3333	18	45	40	0.140163	0.223812	0.650117
442	AS2_scf7180000691413	1506	T	A	ASIC001374-RA:c.436A>T	ASIC001374:p.Ile146Phe	36	41	87.8049	40	52	76.9231	0.0896654	0.210175	0.677418
443	AS2_scf7180000691413	1539	C	T	ASIC001374-RA:c.403G>A	ASIC001374:p.Val135Ile	39	64	60.9375	32	61	52.459	0.0912401	0.21153	0.674628
444	AS2_scf7180000691413	1566	A	G	ASIC001374-RA:c.376T>C	ASIC001374:p.Cys126Arg	52	77	67.5325	31	60	51.6667	0.0241308	0.132939	0.876348
445	AS2_scf7180000691425	8558	A	T	ASIC001380-RA:c.3511T>A	ASIC001380:p.Ser1171Thr	28	41	68.2927	30	50	60	0.125366	0.222636	0.652405
446	AS2_scf7180000691425	9184	G	C	ASIC001380-RA:c.2885C>G	ASIC001380:p.Ala962Gly	24	42	57.1429	13	43	30.2326	0.00784658	0.0796355	1.09889
447	AS2_scf7180000691425	34716	A	T	ASIC001382-RA:c.103T>A	ASIC001382:p.Phe35Ile	22	46	47.8261	12	47	25.5319	0.0145927	0.107359	0.969161
448	AS2_scf7180000691519	21032	A	G	ASIC001410-RA:c.52A>G	ASIC001410:p.Thr18Ala	38	45	84.4444	40	47	85.1064	0.22652	0.250734	0.600786
449	AS2_scf7180000691519	21059	G	A	ASIC001410-RA:c.79G>A	ASIC001410:p.Gly27Arg	43	47	91.4894	51	52	98.0769	0.129678	0.222204	0.653248
450	AS2_scf7180000691519	32837	T	C	ASIC001413-RA:c.83T>C	ASIC001413:p.Leu28Ser	51	51	100	45	46	97.8261	0.474227	0.48932	0.310407
451	AS2_scf7180000691519	33025	C	T	ASIC001413-RA:c.271C>T	ASIC001413:p.His91Tyr	26	63	41.2698	16	44	36.3636	0.140622	0.223736	0.650265
452	AS2_scf7180000691519	33032	G	A	ASIC001413-RA:c.278G>A	ASIC001413:p.Arg93His	22	62	35.4839	33	49	67.3469	0.000588292	0.0233318	1.63205
453	AS2_scf7180000691519	33037	T	C	ASIC001413-RA:c.283T>C	ASIC001413:p.Cys95Arg	23	60	38.3333	30	48	62.5	0.00700419	0.0764008	1.1169
454	AS2_scf7180000691519	33109	A	G	ASIC001413-RA:c.355A>G	ASIC001413:p.Thr119Ala	17	46	36.9565	27	45	60	0.0152665	0.109747	0.959607
455	AS2_scf7180000691519	33113	G	A	ASIC001413-RA:c.359G>A	ASIC001413:p.Gly120Glu	18	47	38.2979	32	43	74.4186	0.000438926	0.0204916	1.68842
456	AS2_scf7180000691519	33115	T	C	ASIC001413-RA:c.361T>C	ASIC001413:p.Ser121Pro	44	46	95.6522	42	43	97.6744	0.391894	0.408493	0.388815
457	AS2_scf7180000691521	16835	A	C	ASIC001417-RA:c.3170T>G	ASIC001417:p.Phe1057Cys	33	44	75	20	40	50	0.0112128	0.094151	1.02617
458	AS2_scf7180000691521	16844	G	A	ASIC001417-RA:c.3161C>T	ASIC001417:p.Ser1054Phe	33	45	73.3333	21	44	47.7273	0.00836388	0.0823784	1.08419
459	AS2_scf7180000691535	27632	A	T	ASIC001427-RA:c.509T>A	ASIC001427:p.Leu170His	20	42	47.619	18	49	36.7347	0.098174	0.21406	0.669465
460	AS2_scf7180000691535	35951	A	C	ASIC001428-RA:c.649T>G	ASIC001428:p.Ser217Ala	24	47	51.0638	22	40	55	0.159655	0.216711	0.664119
461	AS2_scf7180000691535	36125	A	G	ASIC001428-RA:c.475T>C	ASIC001428:p.Ser159Pro	34	43	79.0698	28	41	68.2927	0.106049	0.218242	0.661063
462	AS2_scf7180000691535	36251	G	A	ASIC001428-RA:c.349C>T	ASIC001428:p.Leu117Phe	16	45	35.5556	23	53	43.3962	0.120966	0.221095	0.655422
463	AS2_scf7180000691554	25633	T	C	ASIC001453-RA:c.335A>G	ASIC001453:p.Asn112Ser	23	43	53.4884	25	44	56.8182	0.162577	0.215381	0.666792
464	AS2_scf7180000691554	25802	T	C	ASIC001453-RA:c.166A>G	ASIC001453:p.Ser56Gly	11	45	24.4444	20	43	46.5116	0.0175179	0.116359	0.934202
465	AS2_scf7180000691554	25805	A	C	ASIC001453-RA:c.163T>G	ASIC001453:p.Ser55Ala	15	42	35.7143	30	43	69.7674	0.00125042	0.0323801	1.48972
466	AS2_scf7180000691554	63842	G	A	ASIC001441-RA:c.631G>A	ASIC001441:p.Ala211Thr	24	46	52.1739	18	46	39.1304	0.0764141	0.201942	0.694774
467	AS2_scf7180000691554	73027	T	C	ASIC001442-RA:c.562A>G	ASIC001442:p.Thr188Ala	26	46	56.5217	24	40	60	0.164609	0.213911	0.669767
468	AS2_scf7180000691554	79004	G	A	ASIC001445-RA:c.82G>A	ASIC001445:p.Ala28Thr	29	50	58	21	42	50	0.1245	0.222551	0.652571
469	AS2_scf7180000691554	79323	T	C	ASIC001445-RA:c.401T>C	ASIC001445:p.Leu134Pro	38	43	88.3721	31	45	68.8889	0.0180271	0.117825	0.928763
470	AS2_scf7180000691554	79326	T	C	ASIC001445-RA:c.404T>C	ASIC001445:p.Leu135Ser	43	43	100	43	46	93.4783	0.133669	0.222964	0.651766
471	AS2_scf7180000691554	80711	A	G	ASIC001445-RA:c.724A>G	ASIC001445:p.Ile242Val	31	48	64.5833	31	48	64.5833	0.168782	0.211107	0.675497
472	AS2_scf7180000691554	80723	T	A	ASIC001445-RA:c.736T>A	ASIC001445:p.Leu246Met	24	41	58.5366	33	49	67.3469	0.120212	0.22135	0.65492
473	AS2_scf7180000691554	80772	C	G	ASIC001445-RA:c.785C>G	ASIC001445:p.Ser262Cys	25	40	62.5	32	41	78.0488	0.0611266	0.190722	0.7196
474	AS2_scf7180000691554	80810	C	A	ASIC001445-RA:c.823C>A	ASIC001445:p.Gln275Lys	28	43	65.1163	37	44	84.0909	0.0255396	0.136111	0.866106
475	AS2_scf7180000691554	81374	A	G	ASIC001445-RA:c.1387A>G	ASIC001445:p.Thr463Ala	24	40	60	28	43	65.1163	0.1601	0.216488	0.664567
476	AS2_scf7180000691554	81969	T	C	ASIC001445-RA:c.1982T>C	ASIC001445:p.Val661Ala	18	45	40	27	47	57.4468	0.0416642	0.165522	0.781144
477	AS2_scf7180000691554	82016	G	A	ASIC001445-RA:c.2029G>A	ASIC001445:p.Val677Met	25	50	50	30	48	62.5	0.0751883	0.200912	0.696994
478	AS2_scf7180000691554	82028	G	A	ASIC001445-RA:c.2041G>A	ASIC001445:p.Val681Met	28	49	57.1429	31	47	65.9574	0.112989	0.219503	0.658559
479	AS2_scf7180000691554	82034	G	T	ASIC001445-RA:c.2047G>T	ASIC001445:p.Val683Phe	29	48	60.4167	30	46	65.2174	0.150815	0.221075	0.65546
480	AS2_scf7180000691554	82050	A	G	ASIC001445-RA:c.2063A>G	ASIC001445:p.Asn688Ser	27	47	57.4468	24	41	58.5366	0.170331	0.21026	0.677244
481	AS2_scf7180000691554	82059	C	A	ASIC001445-RA:c.2072C>A	ASIC001445:p.Ala691Glu	27	45	60	25	40	62.5	0.171601	0.209689	0.678425
482	AS2_scf7180000691554	82065	G	T	ASIC001445-RA:c.2078G>T	ASIC001445:p.Ser693Ile	27	46	58.6957	27	42	64.2857	0.150615	0.221138	0.655337
483	AS2_scf7180000691554	82068	G	A	ASIC001445-RA:c.2081G>A	ASIC001445:p.Arg694His	32	49	65.3061	34	44	77.2727	0.0826314	0.207054	0.683917
484	AS2_scf7180000691554	82071	C	T	ASIC001445-RA:c.2084C>T	ASIC001445:p.Ala695Val	31	50	62	30	41	73.1707	0.0956663	0.213667	0.670262
485	AS2_scf7180000691554	89448	T	A	ASIC001446-RA:c.1774A>T	ASIC001446:p.Thr592Ser	15	42	35.7143	18	41	43.9024	0.133489	0.222891	0.651908
486	AS2_scf7180000691554	92997	G	T	ASIC001447-RA:c.326C>A	ASIC001447:p.Pro109Gln	21	43	48.8372	22	43	51.1628	0.166749	0.212219	0.673215
487	AS2_scf7180000691554	100776	C	T	ASIC001450-RA:c.308C>T	ASIC001450:p.Ala103Val	17	40	42.5	20	46	43.4783	0.171968	0.209558	0.678696
488	AS2_scf7180000691554	100905	G	C	ASIC001450-RA:c.437G>C	ASIC001450:p.Arg146Pro	22	45	48.8889	30	48	62.5	0.070192	0.19751	0.704412
489	AS2_scf7180000691554	101025	C	T	ASIC001450-RA:c.485C>T	ASIC001450:p.Thr162Ile	25	48	52.0833	21	41	51.2195	0.167785	0.211478	0.674735
490	AS2_scf7180000691554	106072	A	T	ASIC001451-RA:c.226A>T	ASIC001451:p.Thr76Ser	35	47	74.4681	44	49	89.7959	0.0319711	0.148622	0.827915
491	AS2_scf7180000691602	22002	G	A	ASIC001468-RA:c.41C>T	ASIC001468:p.Pro14Leu	48	53	90.566	49	51	96.0784	0.172235	0.209461	0.678896
492	AS2_scf7180000691602	34557	T	C	ASIC001470-RA:c.1277A>G	ASIC001470:p.Asn426Ser	84	103	81.5534	87	117	74.359	0.0576501	0.186831	0.728551
493	AS2_scf7180000691602	34563	T	C	ASIC001470-RA:c.1271A>G	ASIC001470:p.Asn424Ser	87	105	82.8571	89	122	72.9508	0.0262299	0.137327	0.862245
494	AS2_scf7180000691602	34566	A	T	ASIC001470-RA:c.1268T>A	ASIC001470:p.Ile423Asn	87	102	85.2941	90	119	75.6303	0.027309	0.139884	0.854232
495	AS2_scf7180000691602	38134	A	T	ASIC001470-RA:c.1108T>A	ASIC001470:p.Ser370Thr	312	375	83.2	241	290	83.1034	0.0830943	0.207545	0.682887
496	AS2_scf7180000691602	38171	T	G	ASIC001470-RA:c.1071A>C	ASIC001470:p.Gln357His	314	366	85.7923	243	288	84.375	0.0773278	0.20262	0.693318
497	AS2_scf7180000691602	38194	A	C	ASIC001470-RA:c.1048T>G	ASIC001470:p.Leu350Val	296	338	87.574	233	264	88.2576	0.0971466	0.213328	0.670951
498	AS2_scf7180000691602	38196	C	A	ASIC001470-RA:c.1046G>T	ASIC001470:p.Arg349Ile	296	338	87.574	233	263	88.5932	0.0940717	0.213254	0.671104
499	AS2_scf7180000691602	38220	A	T	ASIC001470-RA:c.1022T>A	ASIC001470:p.Leu341Gln	258	302	85.4305	214	252	84.9206	0.0941002	0.213259	0.671093
500	AS2_scf7180000691602	38224	C	T	ASIC001470-RA:c.1018G>A	ASIC001470:p.Ala340Thr	259	304	85.1974	219	253	86.5613	0.0876784	0.209393	0.679038
501	AS2_scf7180000691602	38262	G	T	ASIC001470-RA:c.980C>A	ASIC001470:p.Ser327Tyr	282	335	84.1791	239	291	82.1306	0.0674681	0.1945	0.711079
502	AS2_scf7180000691602	38303	G	T	ASIC001470-RA:c.939C>A	ASIC001470:p.His313Gln	278	319	87.1473	270	328	82.3171	0.0204312	0.123922	0.906851
503	AS2_scf7180000691602	38351	T	C	ASIC001470-RA:c.891A>G	ASIC001470:p.Ile297Met	281	325	86.4615	255	305	83.6066	0.0538461	0.183952	0.735294
504	AS2_scf7180000691602	38362	T	C	ASIC001470-RA:c.880A>G	ASIC001470:p.Thr294Ala	297	344	86.3372	257	306	83.9869	0.0617693	0.191484	0.717868
505	AS2_scf7180000691602	38433	G	A	ASIC001470-RA:c.809C>T	ASIC001470:p.Ala270Val	192	346	55.4913	168	328	51.2195	0.0332556	0.150943	0.821186
506	AS2_scf7180000691602	38482	A	T	ASIC001470-RA:c.760T>A	ASIC001470:p.Leu254Met	291	343	84.8397	243	300	81	0.036364	0.156242	0.806203
507	AS2_scf7180000691602	38511	T	A	ASIC001470-RA:c.731A>T	ASIC001470:p.Gln244Leu	269	323	83.2817	224	286	78.3217	0.0246615	0.134099	0.872573
508	AS2_scf7180000691602	38517	C	T	ASIC001470-RA:c.725G>A	ASIC001470:p.Gly242Asp	302	323	93.4985	266	287	92.6829	0.117259	0.220586	0.656421
509	AS2_scf7180000691602	38540	A	C	ASIC001470-RA:c.702T>G	ASIC001470:p.Phe234Leu	270	328	82.3171	219	279	78.4946	0.0405865	0.16383	0.785606
510	AS2_scf7180000691602	38557	T	C	ASIC001470-RA:c.685A>G	ASIC001470:p.Ser229Gly	257	318	80.8176	212	265	80	0.0808504	0.205362	0.687479
511	AS2_scf7180000691602	38560	T	C	ASIC001470-RA:c.682A>G	ASIC001470:p.Thr228Ala	261	323	80.805	215	269	79.9257	0.079747	0.204114	0.690127
512	AS2_scf7180000691602	38574	G	T	ASIC001470-RA:c.668C>A	ASIC001470:p.Ala223Glu	270	342	78.9474	219	276	79.3478	0.0787407	0.203419	0.691609
513	AS2_scf7180000691602	38628	A	T	ASIC001470-RA:c.614T>A	ASIC001470:p.Phe205Tyr	158	294	53.7415	141	249	56.6265	0.0550497	0.184971	0.732897
514	AS2_scf7180000691602	38701	T	C	ASIC001470-RA:c.541A>G	ASIC001470:p.Lys181Glu	113	166	68.0723	88	149	59.0604	0.0236623	0.131915	0.879706
515	AS2_scf7180000691602	38706	A	G	ASIC001470-RA:c.536T>C	ASIC001470:p.Val179Ala	119	163	73.0061	86	143	60.1399	0.00568864	0.0690582	1.16078
516	AS2_scf7180000691602	38748	G	A	ASIC001470-RA:c.494C>T	ASIC001470:p.Thr165Ile	149	201	74.1294	112	169	66.2722	0.0234522	0.131551	0.880905
517	AS2_scf7180000691602	38798	T	A	ASIC001470-RA:c.444A>T	ASIC001470:p.Gln148His	178	229	77.7293	128	171	74.8538	0.075459	0.201175	0.696427
518	AS2_scf7180000691602	38802	G	T	ASIC001470-RA:c.440C>A	ASIC001470:p.Ala147Asp	173	223	77.5785	130	172	75.5814	0.0854671	0.208375	0.681153
519	AS2_scf7180000691602	38805	A	G	ASIC001470-RA:c.437T>C	ASIC001470:p.Leu146Ser	143	218	65.5963	109	157	69.4268	0.0658709	0.193759	0.712738
520	AS2_scf7180000691602	38811	G	C	ASIC001470-RA:c.431C>G	ASIC001470:p.Ala144Gly	174	226	76.9912	137	178	76.9663	0.0946886	0.213291	0.671028
521	AS2_scf7180000691602	38814	C	G	ASIC001470-RA:c.428G>C	ASIC001470:p.Gly143Ala	101	235	42.9787	82	188	43.617	0.0779552	0.203091	0.692309
522	AS2_scf7180000691602	38841	C	T	ASIC001470-RA:c.401G>A	ASIC001470:p.Gly134Asp	171	217	78.8018	148	195	75.8974	0.073285	0.199646	0.699739
523	AS2_scf7180000691602	38862	A	T	ASIC001470-RA:c.380T>A	ASIC001470:p.Phe127Tyr	211	261	80.8429	183	231	79.2208	0.0812694	0.205755	0.68665
524	AS2_scf7180000691602	38865	G	C	ASIC001470-RA:c.377C>G	ASIC001470:p.Thr126Ser	212	264	80.303	192	236	81.3559	0.0866796	0.208593	0.680701
525	AS2_scf7180000691602	38890	G	A	ASIC001470-RA:c.352C>T	ASIC001470:p.Pro118Ser	290	335	86.5672	254	299	84.9498	0.0764724	0.2019	0.694864
526	AS2_scf7180000691602	38908	G	T	ASIC001470-RA:c.334C>A	ASIC001470:p.Gln112Lys	290	327	88.685	266	316	84.1772	0.0229149	0.130282	0.885116
527	AS2_scf7180000691602	38929	A	G	ASIC001470-RA:c.313T>C	ASIC001470:p.Ser105Pro	285	312	91.3462	267	309	86.4078	0.0151017	0.109186	0.961832
528	AS2_scf7180000691602	38956	T	C	ASIC001470-RA:c.286A>G	ASIC001470:p.Lys96Glu	278	303	91.7492	248	290	85.5172	0.00590708	0.070351	1.15273
529	AS2_scf7180000691602	38963	C	A	ASIC001470-RA:c.279G>T	ASIC001470:p.Glu93Asp	261	303	86.1386	234	284	82.3944	0.0417122	0.165512	0.781172
530	AS2_scf7180000691602	38982	C	T	ASIC001470-RA:c.260G>A	ASIC001470:p.Arg87Lys	248	293	84.6416	246	303	81.1881	0.0465213	0.173354	0.761065
531	AS2_scf7180000691602	39007	A	T	ASIC001470-RA:c.235T>A	ASIC001470:p.Ser79Thr	261	308	84.7403	226	275	82.1818	0.062998	0.192301	0.716018
532	AS2_scf7180000691602	39009	C	T	ASIC001470-RA:c.233G>A	ASIC001470:p.Gly78Glu	228	314	72.6115	179	281	63.7011	0.004658	0.062695	1.20277
533	AS2_scf7180000691602	39021	T	A	ASIC001470-RA:c.221A>T	ASIC001470:p.Asn74Ile	282	302	93.3775	246	261	94.2529	0.127309	0.222508	0.652654
534	AS2_scf7180000691602	39081	A	G	ASIC001470-RA:c.161T>C	ASIC001470:p.Ile54Thr	253	336	75.2976	210	278	75.5396	0.0748176	0.200808	0.697219
535	AS2_scf7180000691602	51369	A	T	ASIC001472-RA:c.166T>A	ASIC001472:p.Ser56Thr	17	41	41.4634	16	46	34.7826	0.142931	0.223066	0.651567
536	AS2_scf7180000691649	37919	C	T	ASIC001487-RA:c.178C>T	ASIC001487:p.Pro60Ser	19	46	41.3043	13	43	30.2326	0.0981569	0.214108	0.669367
537	AS2_scf7180000691649	39497	G	A	ASIC001487-RA:c.1756G>A	ASIC001487:p.Ala586Thr	19	56	33.9286	30	55	54.5455	0.0142289	0.105923	0.97501
538	AS2_scf7180000691649	40521	C	T	ASIC001488-RA:c.232C>T	ASIC001488:p.Arg78Trp	22	41	53.6585	33	43	76.7442	0.0158892	0.11162	0.952256
539	AS2_scf7180000691649	40524	A	T	ASIC001488-RA:c.235A>T	ASIC001488:p.Arg79Trp	23	43	53.4884	32	42	76.1905	0.016897	0.115232	0.938426
540	AS2_scf7180000691739	37923	G	C	ASIC001515-RA:c.72G>C	ASIC001515:p.Lys24Asn	142	152	93.4211	151	172	87.7907	0.0350251	0.154178	0.811977
541	AS2_scf7180000691739	78995	G	A	ASIC001516-RA:c.571G>A	ASIC001516:p.Ala191Thr	14	46	30.4348	20	45	44.4444	0.0672918	0.194438	0.711218
542	AS2_scf7180000691739	149528	C	G	ASIC001509-RA:c.1775G>C	ASIC001509:p.Ser592Thr	27	41	65.8537	45	48	93.75	0.000804182	0.0268719	1.5707
543	AS2_scf7180000691739	149918	G	A	ASIC001509-RA:c.1385C>T	ASIC001509:p.Ala462Val	44	45	97.7778	48	48	100	0.483871	0.497793	0.302951
544	AS2_scf7180000691739	150590	A	G	ASIC001509-RA:c.785T>C	ASIC001509:p.Val262Ala	25	46	54.3478	15	48	31.25	0.0131489	0.101923	0.991728
545	AS2_scf7180000691739	238675	T	A	ASIC001512-RA:c.140T>A	ASIC001512:p.Phe47Tyr	28	40	70	22	42	52.381	0.0483253	0.176415	0.753464
546	AS2_scf7180000691739	238762	C	T	ASIC001512-RA:c.227C>T	ASIC001512:p.Ala76Val	19	43	44.186	14	48	29.1667	0.0582857	0.187036	0.728074
547	AS2_scf7180000691900	5477	C	T	ASIC001563-RA:c.244G>A	ASIC001563:p.Val82Ile	24	47	51.0638	12	45	26.6667	0.00986042	0.0889179	1.05101
548	AS2_scf7180000691904	39227	G	C	ASIC001580-RA:c.542G>C	ASIC001580:p.Gly181Ala	28	52	53.8462	24	46	52.1739	0.158398	0.21737	0.662801
549	AS2_scf7180000691904	39233	C	G	ASIC001580-RA:c.548C>G	ASIC001580:p.Ala183Gly	23	53	43.3962	16	45	35.5556	0.120966	0.22107	0.655471
550	AS2_scf7180000691904	49124	G	A	ASIC001583-RA:c.388C>T	ASIC001583:p.Pro130Ser	48	50	96	40	47	85.1064	0.0539078	0.184048	0.735069
551	AS2_scf7180000691904	73442	T	C	ASIC001572-RA:c.1640A>G	ASIC001572:p.Gln547Arg	45	49	91.8367	37	43	86.0465	0.179136	0.211663	0.674355
552	AS2_scf7180000691904	73445	C	G	ASIC001572-RA:c.1637G>C	ASIC001572:p.Cys546Ser	32	47	68.0851	24	43	55.814	0.0850041	0.208616	0.680652
553	AS2_scf7180000691904	77659	G	C	ASIC001573-RA:c.1290G>C	ASIC001573:p.Lys430Asn	20	40	50	19	48	39.5833	0.106428	0.218281	0.660985
554	AS2_scf7180000691904	77675	G	A	ASIC001573-RA:c.1306G>A	ASIC001573:p.Val436Ile	20	44	45.4545	23	47	48.9362	0.157512	0.218022	0.661499
555	AS2_scf7180000691904	80385	G	A	ASIC001574-RA:c.278G>A	ASIC001574:p.Gly93Asp	20	43	46.5116	18	40	45	0.1727	0.20945	0.67892
556	AS2_scf7180000691904	87238	C	T	ASIC001575-RA:c.52G>A	ASIC001575:p.Val18Ile	31	40	77.5	45	48	93.75	0.0230285	0.130564	0.884177
557	AS2_scf7180000691904	93543	C	G	ASIC001576-RA:c.630C>G	ASIC001576:p.His210Gln	17	42	40.4762	13	41	31.7073	0.128959	0.222489	0.652692
558	AS2_scf7180000691904	120094	C	A	ASIC001579-RA:c.373G>T	ASIC001579:p.Gly125*	10	43	23.2558	25	57	43.8596	0.0173853	0.115855	0.936085
559	AS2_scf7180000691904	120282	T	C	ASIC001579-RA:c.185A>G	ASIC001579:p.Gln62Arg	19	51	37.2549	18	52	34.6154	0.156448	0.218661	0.66023
560	AS2_scf7180000692052	1588	G	T	ASIC001617-RA:c.730G>T	ASIC001617:p.Val244Leu	156	406	38.4236	108	339	31.8584	0.0107895	0.0925459	1.03364
561	AS2_scf7180000692126	4588	C	T	ASIC001633-RA:c.781G>A	ASIC001633:p.Gly261Ser	38	65	58.4615	35	66	53.0303	0.115073	0.219737	0.658097
562	AS2_scf7180000692126	7037	A	G	ASIC001633-RA:c.269T>C	ASIC001633:p.Val90Ala	27	50	54	35	56	62.5	0.106193	0.21829	0.660966
563	AS2_scf7180000692126	9256	T	C	ASIC001634-RA:c.415A>G	ASIC001634:p.Lys139Glu	76	82	92.6829	69	70	98.5714	0.0758171	0.201407	0.695926
564	AS2_scf7180000692126	9264	A	G	ASIC001634-RA:c.407T>C	ASIC001634:p.Phe136Ser	75	80	93.75	64	66	96.9697	0.212685	0.238818	0.621933
565	AS2_scf7180000692126	9381	C	T	ASIC001634-RA:c.290G>A	ASIC001634:p.Arg97Gln	37	70	52.8571	47	74	63.5135	0.0584959	0.18749	0.727022
566	AS2_scf7180000692126	9662	C	T	ASIC001634-RA:c.197G>A	ASIC001634:p.Arg66Gln	34	58	58.6207	47	72	65.2778	0.106809	0.218267	0.661012
567	AS2_scf7180000692138	202	T	C	ASIC001636-RA:c.29A>G	ASIC001636:p.Asn10Ser	25	41	60.9756	22	45	48.8889	0.0923987	0.212288	0.673074
568	AS2_scf7180000692204	7885	C	G	ASIC001647-RA:c.718C>G	ASIC001647:p.Arg240Gly	17	44	38.6364	29	48	60.4167	0.019284	0.120821	0.917858
569	AS2_scf7180000692302	3784	G	A	ASIC001662-RA:c.101C>T	ASIC001662:p.Pro34Leu	26	49	53.0612	22	44	50	0.157591	0.217983	0.661578
570	AS2_scf7180000692302	3784	G	T	ASIC001662-RA:c.101C>A	ASIC001662:p.Pro34Gln	23	49	46.9388	22	44	50	0.157591	0.217964	0.661615
571	AS2_scf7180000692302	3835	G	A	ASIC001662-RA:c.50C>T	ASIC001662:p.Pro17Leu	13	43	30.2326	23	43	53.4884	0.0164075	0.113891	0.943512
572	AS2_scf7180000692302	21930	T	C	ASIC001664-RA:c.8A>G	ASIC001664:p.Tyr3Cys	33	47	70.2128	32	40	80	0.115559	0.220073	0.657433
573	AS2_scf7180000692630	7097	T	C	ASIC001736-RA:c.101A>G	ASIC001736:p.Asn34Ser	38	45	84.4444	41	49	83.6735	0.22018	0.245278	0.610341
574	AS2_scf7180000692630	14310	T	A	ASIC001737-RA:c.116T>A	ASIC001737:p.Leu39*	24	41	58.5366	26	49	53.0612	0.147717	0.221827	0.653986
575	AS2_scf7180000692630	22598	C	A	ASIC001738-RA:c.53C>A	ASIC001738:p.Ala18Glu	23	48	47.9167	25	47	53.1915	0.142725	0.223235	0.651239
576	AS2_scf7180000692630	22759	G	T	ASIC001738-RA:c.214G>T	ASIC001738:p.Ala72Ser	26	57	45.614	17	43	39.5349	0.135036	0.223057	0.651584
577	AS2_scf7180000692630	32118	A	G	ASIC001738-RA:c.2104A>G	ASIC001738:p.Thr702Ala	45	46	97.8261	49	49	100	0.484211	0.49808	0.302701
578	AS2_scf7180000692630	32347	G	C	ASIC001738-RA:c.2333G>C	ASIC001738:p.Gly778Ala	46	46	100	44	45	97.7778	0.494505	0.506216	0.295664
579	AS2_scf7180000692630	32465	A	T	ASIC001738-RA:c.2451A>T	ASIC001738:p.Glu817Asp	21	42	50	28	46	60.8696	0.1015	0.216036	0.665475
580	AS2_scf7180000692630	32910	T	G	ASIC001738-RA:c.2896T>G	ASIC001738:p.Ser966Ala	21	47	44.6809	20	41	48.7805	0.157564	0.217965	0.661613
581	AS2_scf7180000692841	13508	C	T	ASIC001786-RA:c.589G>A	ASIC001786:p.Gly197Arg	27	43	62.7907	20	52	38.4615	0.0103842	0.0911757	1.04012
582	AS2_scf7180000692841	29550	T	G	ASIC001788-RA:c.944A>C	ASIC001788:p.Gln315Pro	25	42	59.5238	32	49	65.3061	0.146474	0.222309	0.653043
583	AS2_scf7180000692841	30781	C	A	ASIC001788-RA:c.345G>T	ASIC001788:p.Gln115His	21	50	42	14	42	33.3333	0.119821	0.221354	0.654913
584	AS2_scf7180000693062	23861	G	A	ASIC001836-RA:c.43G>A	ASIC001836:p.Asp15Asn	26	48	54.1667	11	44	25	0.00295076	0.0502244	1.29909
585	AS2_scf7180000693062	24446	A	G	ASIC001836-RA:c.628A>G	ASIC001836:p.Thr210Ala	16	41	39.0244	35	50	70	0.0021718	0.0431717	1.3648
586	AS2_scf7180000693062	24525	C	T	ASIC001836-RA:c.707C>T	ASIC001836:p.Thr236Ile	12	40	30	29	52	55.7692	0.00822416	0.0817413	1.08756
587	AS2_scf7180000693062	24530	G	T	ASIC001836-RA:c.712G>T	ASIC001836:p.Asp238Tyr	28	40	70	41	54	75.9259	0.151131	0.220706	0.656186
588	AS2_scf7180000693062	24554	C	A	ASIC001836-RA:c.736C>A	ASIC001836:p.Arg246Ser	25	45	55.5556	16	56	28.5714	0.00389874	0.0575478	1.23997
589	AS2_scf7180000693062	24589	A	C	ASIC001836-RA:c.771A>C	ASIC001836:p.Lys257Asn	23	45	51.1111	17	48	35.4167	0.0526855	0.182855	0.737894
590	AS2_scf7180000693062	24596	G	C	ASIC001836-RA:c.778G>C	ASIC001836:p.Glu260Gln	24	46	52.1739	15	43	34.8837	0.0449335	0.170747	0.767646
591	AS2_scf7180000693062	24963	C	G	ASIC001836-RA:c.1073C>G	ASIC001836:p.Thr358Ser	24	53	45.283	18	52	34.6154	0.085655	0.208212	0.681494
592	AS2_scf7180000693062	35759	A	T	ASIC001838-RA:c.110A>T	ASIC001838:p.Tyr37Phe	26	43	60.4651	15	42	35.7143	0.0131184	0.101783	0.992326
593	AS2_scf7180000693062	48465	T	G	ASIC001840-RA:c.1801A>C	ASIC001840:p.Thr601Pro	28	40	70	33	52	63.4615	0.143152	0.223026	0.651644
594	AS2_scf7180000693062	48952	C	G	ASIC001840-RA:c.1314G>C	ASIC001840:p.Glu438Asp	44	47	93.617	43	44	97.7273	0.266947	0.286722	0.542539
595	AS2_scf7180000693150	56224	G	A	ASIC001875-RA:c.1444C>T	ASIC001875:p.Pro482Ser	32	43	74.4186	42	48	87.5	0.061427	0.190821	0.719375
596	AS2_scf7180000693150	56233	T	C	ASIC001875-RA:c.1435A>G	ASIC001875:p.Ser479Gly	38	41	92.6829	45	45	100	0.104163	0.217816	0.66191
597	AS2_scf7180000693150	56264	C	G	ASIC001875-RA:c.1404G>C	ASIC001875:p.Gln468His	27	53	50.9434	11	52	21.1538	0.00103722	0.0295779	1.52903
598	AS2_scf7180000693150	56271	C	G	ASIC001875-RA:c.1397G>C	ASIC001875:p.Gly466Ala	30	50	60	30	52	57.6923	0.155039	0.219336	0.65889
599	AS2_scf7180000693150	56445	A	G	ASIC001875-RA:c.1223T>C	ASIC001875:p.Leu408Pro	26	55	47.2727	25	55	45.4545	0.148816	0.221603	0.654425
600	AS2_scf7180000693150	56826	G	T	ASIC001875-RA:c.842C>A	ASIC001875:p.Thr281Asn	15	42	35.7143	24	42	57.1429	0.0256945	0.13658	0.864612
601	AS2_scf7180000693150	56974	A	G	ASIC001875-RA:c.694T>C	ASIC001875:p.Ser232Pro	26	47	55.3191	34	51	66.6667	0.085594	0.208157	0.681609
602	AS2_scf7180000693150	57099	G	A	ASIC001875-RA:c.569C>T	ASIC001875:p.Pro190Leu	46	48	95.8333	46	46	100	0.258065	0.278998	0.554399
603	AS2_scf7180000693150	73971	C	G	ASIC001879-RA:c.74C>G	ASIC001879:p.Ala25Gly	19	44	43.1818	23	44	52.2727	0.118186	0.221234	0.655148
604	AS2_scf7180000693169	27096	G	A	ASIC001887-RA:c.93G>A	ASIC001887:p.Met31Ile	25	45	55.5556	14	44	31.8182	0.0136943	0.103883	0.983454
605	AS2_scf7180000693169	27098	C	T	ASIC001887-RA:c.95C>T	ASIC001887:p.Ala32Val	25	47	53.1915	14	43	32.5581	0.0247599	0.134322	0.871854
606	AS2_scf7180000693169	27143	T	C	ASIC001887-RA:c.140T>C	ASIC001887:p.Val47Ala	35	50	70	12	41	29.2683	9.04035e-05	0.0100489	1.99788
607	AS2_scf7180000693169	43822	T	C	ASIC001889-RA:c.40T>C	ASIC001889:p.Ser14Pro	16	45	35.5556	27	55	49.0909	0.064878	0.193556	0.713194
608	AS2_scf7180000693169	58267	G	A	ASIC001892-RA:c.55G>A	ASIC001892:p.Ala19Thr	34	46	73.913	27	41	65.8537	0.133171	0.222838	0.652011
609	AS2_scf7180000693172	27386	T	A	ASIC001894-RA:c.194A>T	ASIC001894:p.Asp65Val	28	45	62.2222	22	46	47.8261	0.0654978	0.193637	0.713011
610	AS2_scf7180000693172	27494	A	G	ASIC001894-RA:c.86T>C	ASIC001894:p.Val29Ala	24	57	42.1053	29	61	47.541	0.123519	0.221792	0.654054
611	AS2_scf7180000693172	29260	A	G	ASIC001895-RA:c.322A>G	ASIC001895:p.Met108Val	35	57	61.4035	43	75	57.3333	0.1273	0.222516	0.652639
612	AS2_scf7180000693172	29262	G	T	ASIC001895-RA:c.324G>T	ASIC001895:p.Met108Ile	24	58	41.3793	29	76	38.1579	0.131572	0.222417	0.652832
613	AS2_scf7180000693172	29273	T	A	ASIC001895-RA:c.335T>A	ASIC001895:p.Leu112*	26	68	38.2353	32	82	39.0244	0.13304	0.222825	0.652036
614	AS2_scf7180000693172	29287	A	G	ASIC001895-RA:c.349A>G	ASIC001895:p.Met117Val	31	69	44.9275	41	90	45.5556	0.127247	0.222566	0.652541
615	AS2_scf7180000693172	45305	A	G	ASIC001896-RA:c.263T>C	ASIC001896:p.Val88Ala	47	84	55.9524	44	73	60.274	0.111104	0.219124	0.659311
616	AS2_scf7180000693172	45321	A	G	ASIC001896-RA:c.247T>C	ASIC001896:p.Ser83Pro	45	89	50.5618	43	79	54.4304	0.108598	0.218534	0.660481
617	AS2_scf7180000693172	50349	C	T	ASIC001897-RA:c.4C>T	ASIC001897:p.His2Tyr	33	68	48.5294	35	77	45.4545	0.123662	0.221998	0.65365
618	AS2_scf7180000693172	50598	G	A	ASIC001897-RA:c.34G>A	ASIC001897:p.Gly12Arg	26	72	36.1111	23	65	35.3846	0.141021	0.223349	0.651017
619	AS2_scf7180000693172	50634	T	A	ASIC001897-RA:c.70T>A	ASIC001897:p.Ser24Thr	25	49	51.0204	20	54	37.037	0.0576771	0.186696	0.728864
620	AS2_scf7180000693172	50826	A	G	ASIC001897-RA:c.196A>G	ASIC001897:p.Ser66Gly	53	74	71.6216	42	69	60.8696	0.0563616	0.185413	0.731859
621	AS2_scf7180000693172	112612	A	T	ASIC001898-RA:c.535A>T	ASIC001898:p.Ser179Cys	22	41	53.6585	26	42	61.9048	0.132448	0.222952	0.651789
622	AS2_scf7180000693172	113429	A	C	ASIC001898-RA:c.1352A>C	ASIC001898:p.Glu451Ala	36	42	85.7143	38	49	77.551	0.133009	0.222932	0.651827
623	AS2_scf7180000693172	114999	A	T	ASIC001898-RA:c.2922A>T	ASIC001898:p.Gln974His	20	45	44.4444	26	49	53.0612	0.116181	0.220309	0.656968
624	AS2_scf7180000693346	4961	G	A	ASIC001937-RA:c.1279C>T	ASIC001937:p.His427Tyr	15	50	30	17	41	41.4634	0.0920906	0.211938	0.673791
625	AS2_scf7180000693346	4972	G	A	ASIC001937-RA:c.1268C>T	ASIC001937:p.Ala423Val	15	47	31.9149	19	41	46.3415	0.0675683	0.194652	0.710741
626	AS2_scf7180000693346	4981	A	G	ASIC001937-RA:c.1259T>C	ASIC001937:p.Val420Ala	17	45	37.7778	15	41	36.5854	0.175429	0.209878	0.678034
627	AS2_scf7180000693346	5237	G	A	ASIC001937-RA:c.1003C>T	ASIC001937:p.Pro335Ser	42	45	93.3333	47	51	92.1569	0.29751	0.315752	0.500654
628	AS2_scf7180000693346	5828	A	G	ASIC001937-RA:c.412T>C	ASIC001937:p.Ser138Pro	48	48	100	47	48	97.9167	0.5	0.5112	0.291409
629	AS2_scf7180000693473	42706	C	T	ASIC001969-RA:c.43C>T	ASIC001969:p.Arg15Trp	38	44	86.3636	10	43	23.2558	1.62599e-09	1.32843e-05	4.87666
630	AS2_scf7180000693723	7797	T	C	ASIC002018-RA:c.49T>C	ASIC002018:p.Phe17Leu	29	46	63.0435	23	45	51.1111	0.0876535	0.209425	0.678971
631	AS2_scf7180000693723	7815	C	T	ASIC002018-RA:c.67C>T	ASIC002018:p.Pro23Ser	38	50	76	35	47	74.4681	0.182893	0.214381	0.668813
632	AS2_scf7180000693723	18385	C	T	ASIC002019-RA:c.857G>A	ASIC002019:p.Arg286Gln	21	40	52.5	21	44	47.7273	0.157377	0.218185	0.661174
633	AS2_scf7180000693723	23507	T	A	ASIC002020-RA:c.1624T>A	ASIC002020:p.Ser542Thr	40	44	90.9091	46	52	88.4615	0.24501	0.267111	0.573309
634	AS2_scf7180000693723	27057	T	G	ASIC002022-RA:c.4614A>C	ASIC002022:p.Lys1538Asn	26	46	56.5217	32	42	76.1905	0.0277395	0.140372	0.852718
635	AS2_scf7180000693723	27139	C	A	ASIC002022-RA:c.4532G>T	ASIC002022:p.Arg1511Leu	45	49	91.8367	34	41	82.9268	0.114491	0.21986	0.657853
636	AS2_scf7180000693723	27176	C	A	ASIC002022-RA:c.4495G>T	ASIC002022:p.Ala1499Ser	43	45	95.5556	41	46	89.1304	0.167661	0.21178	0.674116
637	AS2_scf7180000693723	28832	T	C	ASIC002022-RA:c.2941A>G	ASIC002022:p.Thr981Ala	40	41	97.561	42	51	82.3529	0.0172987	0.115844	0.936126
638	AS2_scf7180000693723	29138	G	A	ASIC002022-RA:c.2635C>T	ASIC002022:p.Leu879Phe	39	48	81.25	25	48	52.0833	0.00174802	0.0384942	1.4146
639	AS2_scf7180000693753	21404	G	T	ASIC002030-RA:c.326G>T	ASIC002030:p.Trp109Leu	12	44	27.2727	27	42	64.2857	0.000453146	0.0206827	1.68439
640	AS2_scf7180000693753	31564	T	C	ASIC002032-RA:c.272A>G	ASIC002032:p.Gln91Arg	48	48	100	40	43	93.0233	0.101585	0.216047	0.665451
641	AS2_scf7180000693753	31606	G	C	ASIC002032-RA:c.230C>G	ASIC002032:p.Ala77Gly	28	57	49.1228	16	49	32.6531	0.036734	0.156719	0.804878
642	AS2_scf7180000693753	31627	T	A	ASIC002032-RA:c.209A>T	ASIC002032:p.His70Leu	25	49	51.0204	15	48	31.25	0.0237533	0.132286	0.878485
643	AS2_scf7180000693753	36082	A	G	ASIC002033-RA:c.284T>C	ASIC002033:p.Val95Ala	37	43	86.0465	39	40	97.5	0.0587338	0.187958	0.72594
644	AS2_scf7180000693753	36161	T	A	ASIC002033-RA:c.205A>T	ASIC002033:p.Ser69Cys	51	52	98.0769	41	41	100	0.55914	0.559859	0.251921
645	AS2_scf7180000693753	36176	T	A	ASIC002033-RA:c.190A>T	ASIC002033:p.Ser64Cys	23	50	46	18	50	36	0.0969636	0.213184	0.671245
646	AS2_scf7180000693753	36357	T	A	ASIC002033-RA:c.9A>T	ASIC002033:p.Gln3His	20	44	45.4545	22	47	46.8085	0.165132	0.213419	0.670768
647	AS2_scf7180000693767	14708	T	C	ASIC002040-RA:c.1126T>C	ASIC002040:p.Cys376Arg	26	43	60.4651	37	51	72.549	0.0816285	0.20593	0.68628
648	AS2_scf7180000693808	21179	A	G	ASIC002055-RA:c.31A>G	ASIC002055:p.Ile11Val	37	43	86.0465	39	44	88.6364	0.236413	0.259365	0.586089
649	AS2_scf7180000693808	34892	A	G	ASIC002056-RA:c.1025T>C	ASIC002056:p.Val342Ala	29	50	58	26	55	47.2727	0.0856023	0.208146	0.681632
650	AS2_scf7180000693846	16579	C	G	ASIC002068-RA:c.1316G>C	ASIC002068:p.Gly439Ala	20	49	40.8163	21	43	48.8372	0.124104	0.222305	0.653051
651	AS2_scf7180000693846	17335	C	G	ASIC002068-RA:c.1005G>C	ASIC002068:p.Lys335Asn	38	43	88.3721	50	55	90.9091	0.239093	0.261656	0.582269
652	AS2_scf7180000693868	41158	G	C	ASIC002077-RA:c.206G>C	ASIC002077:p.Arg69Pro	24	42	57.1429	16	51	31.3725	0.00765148	0.0790799	1.10193
653	AS2_scf7180000694039	26774	C	T	ASIC002109-RA:c.491G>A	ASIC002109:p.Gly164Asp	22	47	46.8085	18	57	31.5789	0.0462742	0.172749	0.762586
654	AS2_scf7180000694039	26789	G	C	ASIC002109-RA:c.476C>G	ASIC002109:p.Ala159Gly	44	45	97.7778	49	49	100	0.478723	0.493336	0.306857
655	AS2_scf7180000694039	32522	G	C	ASIC002110-RA:c.121G>C	ASIC002110:p.Glu41Gln	18	43	41.8605	31	46	67.3913	0.00935976	0.0866507	1.06223
656	AS2_scf7180000694039	34099	C	G	ASIC002111-RA:c.252G>C	ASIC002111:p.Leu84Phe	16	40	40	18	45	40	0.175313	0.209924	0.677939
657	AS2_scf7180000694039	34384	T	C	ASIC002111-RA:c.118A>G	ASIC002111:p.Arg40Gly	41	47	87.234	46	50	92	0.196626	0.225038	0.647744
658	AS2_scf7180000694039	34396	A	C	ASIC002111-RA:c.106T>G	ASIC002111:p.Leu36Val	31	42	73.8095	41	50	82	0.128451	0.2226	0.652474
659	AS2_scf7180000694055	14555	T	G	ASIC002121-RA:c.364A>C	ASIC002121:p.Thr122Pro	23	50	46	15	40	37.5	0.123404	0.221902	0.653838
660	AS2_scf7180000694055	14918	G	C	ASIC002121-RA:c.38C>G	ASIC002121:p.Ala13Gly	42	49	85.7143	36	53	67.9245	0.0202819	0.123521	0.908261
661	AS2_scf7180000694055	49483	A	G	ASIC002122-RA:c.1054A>G	ASIC002122:p.Thr352Ala	29	42	69.0476	28	41	68.2927	0.186262	0.216853	0.663836
662	AS2_scf7180000694055	49487	C	G	ASIC002122-RA:c.1058C>G	ASIC002122:p.Ala353Gly	33	43	76.7442	31	42	73.8095	0.188867	0.218779	0.659995
663	AS2_scf7180000694055	75967	G	C	ASIC002127-RA:c.231C>G	ASIC002127:p.Cys77Trp	19	43	44.186	17	51	33.3333	0.09508	0.213349	0.670909
664	AS2_scf7180000694055	114470	C	T	ASIC002118-RA:c.155G>A	ASIC002118:p.Arg52Gln	16	40	40	14	40	35	0.164416	0.213915	0.669758
665	AS2_scf7180000694055	114491	A	G	ASIC002118-RA:c.134T>C	ASIC002118:p.Leu45Pro	20	46	43.4783	18	42	42.8571	0.170118	0.210474	0.676802
666	AS2_scf7180000694055	114524	C	T	ASIC002118-RA:c.101G>A	ASIC002118:p.Gly34Glu	22	49	44.898	23	56	41.0714	0.144892	0.222618	0.65244
667	AS2_scf7180000694055	133200	G	T	ASIC002119-RA:c.79G>T	ASIC002119:p.Gly27Cys	17	46	36.9565	29	53	54.717	0.0343663	0.153302	0.814452
668	AS2_scf7180000694094	26642	T	C	ASIC002136-RA:c.308A>G	ASIC002136:p.Lys103Arg	19	40	47.5	13	41	31.7073	0.0638672	0.192936	0.714587
669	AS2_scf7180000694094	31312	T	C	ASIC002137-RA:c.278T>C	ASIC002137:p.Val93Ala	43	43	100	41	42	97.619	0.494118	0.50639	0.295515
670	AS2_scf7180000694094	31843	C	T	ASIC002138-RA:c.2935G>A	ASIC002138:p.Gly979Ser	34	43	79.0698	26	47	55.3191	0.0105153	0.0914912	1.03862
671	AS2_scf7180000694094	34347	G	T	ASIC002138-RA:c.1387C>A	ASIC002138:p.Gln463Lys	43	44	97.7273	39	40	97.5	0.504877	0.513487	0.28947
672	AS2_scf7180000694094	34475	C	T	ASIC002138-RA:c.1259G>A	ASIC002138:p.Gly420Asp	16	41	39.0244	38	52	73.0769	0.00074223	0.0261945	1.58179
673	AS2_scf7180000694094	34606	C	A	ASIC002138-RA:c.1128G>T	ASIC002138:p.Leu376Phe	36	48	75	53	59	89.8305	0.0270497	0.139386	0.855781
674	AS2_scf7180000694094	34749	T	G	ASIC002138-RA:c.1051A>C	ASIC002138:p.Asn351His	50	51	98.0392	42	42	100	0.548387	0.549632	0.259928
675	AS2_scf7180000694097	3661	A	G	ASIC002144-RA:c.34A>G	ASIC002144:p.Ser12Gly	25	53	47.1698	22	50	44	0.148963	0.221621	0.65439
676	AS2_scf7180000694097	3845	A	G	ASIC002144-RA:c.218A>G	ASIC002144:p.Tyr73Cys	46	55	83.6364	54	55	98.1818	0.00745692	0.0780565	1.10759
677	AS2_scf7180000694106	14070	G	A	ASIC002148-RA:c.197G>A	ASIC002148:p.Arg66Gln	35	50	70	34	45	75.5556	0.152637	0.220229	0.657125
678	AS2_scf7180000694106	23949	A	G	ASIC002149-RA:c.431T>C	ASIC002149:p.Ile144Thr	39	41	95.122	39	43	90.6977	0.248956	0.270763	0.56741
679	AS2_scf7180000694106	27397	T	C	ASIC002150-RA:c.676A>G	ASIC002150:p.Asn226Asp	21	44	47.7273	18	50	36	0.0865392	0.20847	0.680957
680	AS2_scf7180000694106	34776	T	G	ASIC002151-RA:c.17T>G	ASIC002151:p.Ile6Ser	15	45	33.3333	19	42	45.2381	0.0922592	0.212117	0.673425
681	AS2_scf7180000694106	34871	C	G	ASIC002151-RA:c.112C>G	ASIC002151:p.Pro38Ala	29	51	56.8627	18	40	45	0.0899843	0.21053	0.676685
682	AS2_scf7180000694106	36437	G	C	ASIC002151-RA:c.1330G>C	ASIC002151:p.Ala444Pro	39	45	86.6667	37	40	92.5	0.19545	0.224101	0.649557
683	AS2_scf7180000694106	66358	A	C	ASIC002154-RA:c.941T>G	ASIC002154:p.Phe314Cys	18	41	43.9024	21	41	51.2195	0.141013	0.223379	0.650958
684	AS2_scf7180000694122	10239	A	G	ASIC002160-RA:c.419A>G	ASIC002160:p.His140Arg	40	44	90.9091	27	42	64.2857	0.00245291	0.0459112	1.33808
685	AS2_scf7180000694122	14469	A	G	ASIC002160-RA:c.3991A>G	ASIC002160:p.Thr1331Ala	27	42	64.2857	30	45	66.6667	0.173553	0.209551	0.678711
686	AS2_scf7180000694147	36440	A	C	ASIC002171-RA:c.4916T>G	ASIC002171:p.Ile1639Ser	19	43	44.186	19	47	40.4255	0.158494	0.217391	0.662758
687	AS2_scf7180000694147	36900	T	G	ASIC002171-RA:c.4456A>C	ASIC002171:p.Thr1486Pro	45	55	81.8182	37	52	71.1538	0.078798	0.203438	0.691568
688	AS2_scf7180000694147	70368	G	C	ASIC002174-RA:c.142G>C	ASIC002174:p.Asp48His	26	45	57.7778	33	58	56.8966	0.158416	0.217376	0.662788
689	AS2_scf7180000694147	70397	G	T	ASIC002174-RA:c.171G>T	ASIC002174:p.Lys57Asn	19	43	44.186	28	55	50.9091	0.130271	0.222265	0.65313
690	AS2_scf7180000694147	72795	C	T	ASIC002175-RA:c.1717G>A	ASIC002175:p.Ala573Thr	25	43	58.1395	15	41	36.5854	0.025254	0.135696	0.867434
691	AS2_scf7180000694147	72998	T	C	ASIC002175-RA:c.1514A>G	ASIC002175:p.His505Arg	40	40	100	46	49	93.8776	0.162235	0.215504	0.666545
692	AS2_scf7180000694298	35066	T	C	ASIC002216-RA:c.154A>G	ASIC002216:p.Lys52Glu	22	50	44	19	43	44.186	0.165708	0.213001	0.671619
693	AS2_scf7180000694298	48492	G	A	ASIC002219-RA:c.98G>A	ASIC002219:p.Arg33Gln	40	40	100	40	44	90.9091	0.0703555	0.197765	0.70385
694	AS2_scf7180000694298	48630	A	G	ASIC002219-RA:c.236A>G	ASIC002219:p.Asp79Gly	32	53	60.3774	23	40	57.5	0.161973	0.215578	0.666396
695	AS2_scf7180000694298	51790	G	A	ASIC002220-RA:c.608G>A	ASIC002220:p.Cys203Tyr	27	47	57.4468	17	41	41.4634	0.0563781	0.185393	0.731907
696	AS2_scf7180000694298	57430	A	G	ASIC002222-RA:c.619A>G	ASIC002222:p.Thr207Ala	42	44	95.4545	42	42	100	0.258824	0.279541	0.553554
697	AS2_scf7180000694298	57813	G	A	ASIC002222-RA:c.856G>A	ASIC002222:p.Val286Ile	13	41	31.7073	21	40	52.5	0.0304673	0.145396	0.837448
698	AS2_scf7180000694298	69777	C	G	ASIC002212-RA:c.45G>C	ASIC002212:p.Met15Ile	29	42	69.0476	33	59	55.9322	0.0688231	0.196123	0.707471
699	AS2_scf7180000694298	96694	A	G	ASIC002213-RA:c.125A>G	ASIC002213:p.Tyr42Cys	45	47	95.7447	40	42	95.2381	0.381197	0.39859	0.399474
700	AS2_scf7180000694298	96778	G	A	ASIC002213-RA:c.209G>A	ASIC002213:p.Gly70Glu	48	55	87.2727	37	43	86.0465	0.230215	0.253947	0.595258
701	AS2_scf7180000694298	99727	T	C	ASIC002214-RA:c.5T>C	ASIC002214:p.Val2Ala	38	40	95	39	42	92.8571	0.328176	0.345204	0.461924
702	AS2_scf7180000694302	38727	T	A	ASIC002227-RA:c.1419A>T	ASIC002227:p.Gln473His	19	44	43.1818	15	43	34.8837	0.12783	0.222705	0.652271
703	AS2_scf7180000694340	20442	G	A	ASIC002244-RA:c.1688G>A	ASIC002244:p.Arg563Lys	28	46	60.8696	36	43	83.7209	0.0108302	0.0928469	1.03223
704	AS2_scf7180000694340	20964	A	T	ASIC002244-RA:c.2210A>T	ASIC002244:p.Gln737Leu	20	40	50	16	40	40	0.119708	0.22147	0.654685
705	AS2_scf7180000694340	20999	T	C	ASIC002244-RA:c.2245T>C	ASIC002244:p.Ser749Pro	19	40	47.5	22	45	48.8889	0.170601	0.21026	0.677243
706	AS2_scf7180000694340	27054	G	A	ASIC002249-RA:c.718G>A	ASIC002249:p.Asp240Asn	30	41	73.1707	27	41	65.8537	0.147236	0.222063	0.653523
707	AS2_scf7180000694340	31221	C	T	ASIC002250-RA:c.440G>A	ASIC002250:p.Ser147Asn	21	50	42	19	43	44.186	0.162502	0.215457	0.66664
708	AS2_scf7180000694340	31248	G	C	ASIC002250-RA:c.413C>G	ASIC002250:p.Ala138Gly	37	51	72.549	18	41	43.9024	0.00367067	0.0558982	1.2526
709	AS2_scf7180000694340	31258	G	T	ASIC002250-RA:c.403C>A	ASIC002250:p.Leu135Ile	26	42	61.9048	20	44	45.4545	0.0543403	0.184178	0.734763
710	AS2_scf7180000694340	32336	A	G	ASIC002250-RA:c.206T>C	ASIC002250:p.Leu69Ser	24	43	55.814	20	42	47.619	0.129825	0.22206	0.653529
711	AS2_scf7180000694340	32532	T	G	ASIC002250-RA:c.10A>C	ASIC002250:p.Thr4Pro	46	50	92	40	44	90.9091	0.280856	0.299829	0.523127
712	AS2_scf7180000694340	56479	C	T	ASIC002234-RA:c.286C>T	ASIC002234:p.Arg96Cys	14	43	32.5581	20	45	44.4444	0.0912894	0.211554	0.674578
713	AS2_scf7180000694340	59175	C	A	ASIC002236-RA:c.460G>T	ASIC002236:p.Ala154Ser	36	40	90	39	41	95.122	0.230911	0.254525	0.594269
714	AS2_scf7180000694340	59495	T	C	ASIC002236-RA:c.200A>G	ASIC002236:p.Gln67Arg	46	47	97.8723	39	40	97.5	0.502539	0.512258	0.290511
715	AS2_scf7180000694340	66954	A	G	ASIC002239-RA:c.232A>G	ASIC002239:p.Thr78Ala	23	43	53.4884	19	51	37.2549	0.0485129	0.176705	0.75275
716	AS2_scf7180000694340	67513	A	G	ASIC002239-RA:c.791A>G	ASIC002239:p.Gln264Arg	18	49	36.7347	23	43	53.4884	0.0462998	0.172765	0.762544
717	AS2_scf7180000694340	70226	C	T	ASIC002241-RA:c.8G>A	ASIC002241:p.Arg3Gln	13	41	31.7073	21	49	42.8571	0.0972133	0.213245	0.67112
718	AS2_scf7180000694340	86405	A	G	ASIC002243-RA:c.253A>G	ASIC002243:p.Thr85Ala	25	44	56.8182	21	40	52.5	0.16061	0.216104	0.665338
719	AS2_scf7180000694340	88703	T	C	ASIC002245-RA:c.241T>C	ASIC002245:p.Trp81Arg	21	45	46.6667	24	55	43.6364	0.152829	0.22	0.657578
720	AS2_scf7180000694340	88721	G	A	ASIC002245-RA:c.259G>A	ASIC002245:p.Glu87Lys	21	44	47.7273	19	51	37.2549	0.0978061	0.213742	0.670109
721	AS2_scf7180000694340	88724	T	C	ASIC002245-RA:c.262T>C	ASIC002245:p.Ser88Pro	42	43	97.6744	46	51	90.1961	0.124057	0.222269	0.65312
722	AS2_scf7180000694399	8090	A	G	ASIC002282-RA:c.563A>G	ASIC002282:p.Asp188Gly	48	67	71.6418	33	46	71.7391	0.168034	0.211206	0.675295
723	AS2_scf7180000694399	38488	C	G	ASIC002273-RA:c.2646G>C	ASIC002273:p.Glu882Asp	21	45	46.6667	31	52	59.6154	0.0726713	0.199404	0.700267
724	AS2_scf7180000694399	40807	C	T	ASIC002273-RA:c.1561G>A	ASIC002273:p.Ala521Thr	27	42	64.2857	25	41	60.9756	0.170972	0.210083	0.677609
725	AS2_scf7180000694399	58413	G	A	ASIC002276-RA:c.3127G>A	ASIC002276:p.Ala1043Thr	25	40	62.5	30	47	63.8298	0.174771	0.209813	0.678167
726	AS2_scf7180000694399	85131	G	A	ASIC002277-RA:c.2143G>A	ASIC002277:p.Gly715Ser	20	53	37.7358	15	40	37.5	0.170911	0.210103	0.677568
727	AS2_scf7180000694399	88584	A	G	ASIC002278-RA:c.86A>G	ASIC002278:p.Asp29Gly	17	46	36.9565	19	50	38	0.166058	0.212715	0.672202
728	AS2_scf7180000694399	89068	A	C	ASIC002278-RA:c.384A>C	ASIC002278:p.Gln128His	18	40	45	28	46	60.8696	0.0592296	0.188254	0.725257
729	AS2_scf7180000694399	89075	T	C	ASIC002278-RA:c.391T>C	ASIC002278:p.Ser131Pro	19	44	43.1818	28	49	57.1429	0.0676813	0.194737	0.710551
730	AS2_scf7180000694399	89090	A	G	ASIC002278-RA:c.406A>G	ASIC002278:p.Asn136Asp	37	42	88.0952	43	51	84.3137	0.208688	0.235235	0.628498
731	AS2_scf7180000694399	89166	T	C	ASIC002278-RA:c.482T>C	ASIC002278:p.Val161Ala	21	49	42.8571	17	44	38.6364	0.153858	0.219683	0.658204
732	AS2_scf7180000694399	89327	G	A	ASIC002278-RA:c.643G>A	ASIC002278:p.Asp215Asn	12	43	27.907	25	42	59.5238	0.00236916	0.0449096	1.34766
733	AS2_scf7180000694399	89460	A	C	ASIC002278-RA:c.776A>C	ASIC002278:p.Gln259Pro	14	40	35	26	49	53.0612	0.0407067	0.163991	0.78518
734	AS2_scf7180000694399	90335	A	C	ASIC002278-RA:c.1651A>C	ASIC002278:p.Met551Leu	42	47	89.3617	50	50	100	0.0238019	0.132422	0.87804
735	AS2_scf7180000694399	90357	A	C	ASIC002278-RA:c.1673A>C	ASIC002278:p.Gln558Pro	38	42	90.4762	45	45	100	0.0502854	0.17909	0.74693
736	AS2_scf7180000694399	106778	C	T	ASIC002281-RA:c.2296G>A	ASIC002281:p.Glu766Lys	16	54	29.6296	24	42	57.1429	0.00436468	0.0616412	1.21013
737	AS2_scf7180000694399	107607	C	A	ASIC002281-RA:c.1602G>T	ASIC002281:p.Glu534Asp	20	44	45.4545	29	46	63.0435	0.0422016	0.166725	0.777999
738	AS2_scf7180000694399	108193	T	C	ASIC002281-RA:c.1016A>G	ASIC002281:p.Asn339Ser	17	42	40.4762	29	54	53.7037	0.0723388	0.199496	0.700065
739	AS2_scf7180000694399	108580	C	T	ASIC002281-RA:c.629G>A	ASIC002281:p.Gly210Glu	17	42	40.4762	31	45	68.8889	0.00510527	0.0657369	1.18219
740	AS2_scf7180000694399	115847	G	A	ASIC002283-RA:c.1588G>A	ASIC002283:p.Ala530Thr	34	43	79.0698	37	40	92.5	0.057527	0.186766	0.728703
741	AS2_scf7180000694399	118465	T	C	ASIC002285-RA:c.1952A>G	ASIC002285:p.Lys651Arg	41	44	93.1818	38	40	95	0.334618	0.351753	0.453762
742	AS2_scf7180000694399	145219	T	C	ASIC002290-RA:c.175T>C	ASIC002290:p.Cys59Arg	20	41	48.7805	23	55	41.8182	0.13082	0.222435	0.652796
743	AS2_scf7180000694399	145225	G	T	ASIC002290-RA:c.181G>T	ASIC002290:p.Gly61Cys	35	46	76.087	33	53	62.2642	0.058989	0.188038	0.725755
744	AS2_scf7180000694399	145229	C	A	ASIC002290-RA:c.185C>A	ASIC002290:p.Ser62*	19	47	40.4255	25	52	48.0769	0.120428	0.221225	0.655165
745	AS2_scf7180000694399	145352	C	G	ASIC002290-RA:c.308C>G	ASIC002290:p.Ser103Trp	40	48	83.3333	33	45	73.3333	0.10203	0.216403	0.664736
746	AS2_scf7180000694553	24064	T	G	ASIC002333-RA:c.787T>G	ASIC002333:p.Ser263Ala	46	47	97.8723	44	44	100	0.516484	0.521462	0.282777
747	AS2_scf7180000694553	57791	C	T	ASIC002336-RA:c.356C>T	ASIC002336:p.Pro119Leu	39	46	84.7826	45	47	95.7447	0.060156	0.189429	0.722553
748	AS2_scf7180000694553	57794	G	A	ASIC002336-RA:c.359G>A	ASIC002336:p.Cys120Tyr	16	45	35.5556	32	51	62.7451	0.00486944	0.0643223	1.19164
749	AS2_scf7180000694553	58351	C	T	ASIC002337-RA:c.283C>T	ASIC002337:p.Arg95Trp	17	43	39.5349	17	49	34.6939	0.15272	0.220076	0.657428
750	AS2_scf7180000694553	58459	G	A	ASIC002337-RA:c.391G>A	ASIC002337:p.Ala131Thr	22	41	53.6585	24	51	47.0588	0.136741	0.223457	0.650806
751	AS2_scf7180000694553	69275	A	G	ASIC002339-RA:c.569T>C	ASIC002339:p.Val190Ala	23	43	53.4884	20	40	50	0.165429	0.213128	0.671359
752	AS2_scf7180000694553	69332	A	G	ASIC002339-RA:c.512T>C	ASIC002339:p.Val171Ala	15	40	37.5	26	45	57.7778	0.0309616	0.146556	0.833995
753	AS2_scf7180000694553	69633	C	A	ASIC002339-RA:c.211G>T	ASIC002339:p.Ala71Ser	32	45	71.1111	39	42	92.8571	0.00707561	0.0766681	1.11539
754	AS2_scf7180000694553	77739	T	C	ASIC002331-RA:c.13A>G	ASIC002331:p.Thr5Ala	25	59	42.3729	12	40	30	0.0785254	0.203377	0.691698
755	AS2_scf7180000694553	78578	A	T	ASIC002332-RA:c.1236T>A	ASIC002332:p.Asp412Glu	40	46	86.9565	40	44	90.9091	0.222275	0.247308	0.606761
756	AS2_scf7180000694553	78630	A	G	ASIC002332-RA:c.1184T>C	ASIC002332:p.Val395Ala	35	48	72.9167	22	51	43.1373	0.00183719	0.0395516	1.40284
757	AS2_scf7180000694553	79450	C	T	ASIC002332-RA:c.364G>A	ASIC002332:p.Ala122Thr	14	42	33.3333	19	46	41.3043	0.130522	0.222345	0.652973
758	AS2_scf7180000694730	13833	T	C	ASIC002367-RA:c.1408T>C	ASIC002367:p.Ser470Pro	42	46	91.3043	41	44	93.1818	0.289267	0.307643	0.511953
759	AS2_scf7180000694730	13872	C	T	ASIC002367-RA:c.1447C>T	ASIC002367:p.Pro483Ser	11	47	23.4043	24	47	51.0638	0.00370105	0.0560994	1.25104
760	AS2_scf7180000694833	32000	G	C	ASIC002411-RA:c.1099C>G	ASIC002411:p.Gln367Glu	21	42	50	44	62	70.9677	0.016258	0.113237	0.94601
761	AS2_scf7180000694833	32021	T	G	ASIC002411-RA:c.1078A>C	ASIC002411:p.Asn360His	27	42	64.2857	23	51	45.098	0.0308446	0.146299	0.834758
762	AS2_scf7180000694833	32090	G	A	ASIC002411-RA:c.1009C>T	ASIC002411:p.Arg337Cys	26	51	50.9804	33	77	42.8571	0.0959802	0.21358	0.67044
763	AS2_scf7180000694833	32519	C	T	ASIC002411-RA:c.580G>A	ASIC002411:p.Val194Ile	24	43	55.814	27	70	38.5714	0.0318879	0.148405	0.828552
764	AS2_scf7180000694833	32579	G	C	ASIC002411-RA:c.520C>G	ASIC002411:p.Pro174Ala	34	50	68	28	81	34.5679	0.000139212	0.0122958	1.91024
765	AS2_scf7180000694833	32612	A	C	ASIC002411-RA:c.487T>G	ASIC002411:p.Ser163Ala	36	50	72	63	78	80.7692	0.0876573	0.209403	0.679016
766	AS2_scf7180000694833	32742	C	G	ASIC002411-RA:c.357G>C	ASIC002411:p.Met119Ile	27	41	65.8537	23	64	35.9375	0.0018463	0.0396432	1.40183
767	AS2_scf7180000694833	33008	T	C	ASIC002411-RA:c.91A>G	ASIC002411:p.Asn31Asp	11	41	26.8293	28	58	48.2759	0.0167009	0.114709	0.940402
768	AS2_scf7180000694833	33073	T	A	ASIC002411-RA:c.26A>T	ASIC002411:p.Glu9Val	24	47	51.0638	20	54	37.037	0.0592262	0.188426	0.724859
769	AS2_scf7180000694833	33080	T	C	ASIC002411-RA:c.19A>G	ASIC002411:p.Asn7Asp	38	47	80.8511	43	51	84.3137	0.189791	0.219413	0.658738
770	AS2_scf7180000694833	40209	T	C	ASIC002413-RA:c.191T>C	ASIC002413:p.Val64Ala	41	42	97.619	43	54	79.6296	0.00643599	0.0730813	1.13619
771	AS2_scf7180000694833	40296	T	C	ASIC002413-RA:c.278T>C	ASIC002413:p.Val93Ala	42	42	100	40	42	95.2381	0.246988	0.269034	0.570192
772	AS2_scf7180000694833	40773	C	G	ASIC002413-RA:c.687C>G	ASIC002413:p.Asp229Glu	37	48	77.0833	26	47	55.3191	0.0143229	0.10638	0.973141
773	AS2_scf7180000694833	41731	C	T	ASIC002414-RA:c.40G>A	ASIC002414:p.Val14Ile	28	40	70	29	47	61.7021	0.130178	0.222129	0.653394
774	AS2_scf7180000694833	63736	T	A	ASIC002391-RA:c.84T>A	ASIC002391:p.Asp28Glu	48	56	85.7143	28	45	62.2222	0.0048617	0.064324	1.19163
775	AS2_scf7180000694833	63741	G	A	ASIC002391-RA:c.89G>A	ASIC002391:p.Arg30His	18	57	31.5789	19	45	42.2222	0.0893424	0.20993	0.677925
776	AS2_scf7180000694833	63773	T	A	ASIC002391-RA:c.121T>A	ASIC002391:p.Leu41Met	51	64	79.6875	37	52	71.1538	0.0981182	0.214081	0.669422
777	AS2_scf7180000694833	93525	C	G	ASIC002394-RA:c.125C>G	ASIC002394:p.Ala42Gly	9	47	19.1489	25	50	50	0.00104816	0.0298378	1.52523
778	AS2_scf7180000694833	93579	A	C	ASIC002394-RA:c.179A>C	ASIC002394:p.Asp60Ala	37	46	80.4348	40	41	97.561	0.0112905	0.0943182	1.0254
779	AS2_scf7180000694833	98225	A	G	ASIC002396-RA:c.163A>G	ASIC002396:p.Ile55Val	37	40	92.5	41	41	100	0.115799	0.220121	0.657338
780	AS2_scf7180000694833	103131	G	C	ASIC002397-RA:c.88G>C	ASIC002397:p.Glu30Gln	42	46	91.3043	23	46	50	9.70083e-06	0.00386614	2.41272
781	AS2_scf7180000694833	142235	G	A	ASIC002400-RA:c.83C>T	ASIC002400:p.Ala28Val	13	40	32.5	26	40	65	0.00266248	0.0482851	1.31619
782	AS2_scf7180000694833	169013	A	G	ASIC002403-RA:c.3484A>G	ASIC002403:p.Thr1162Ala	16	43	37.2093	23	54	42.5926	0.143536	0.222902	0.651886
783	AS2_scf7180000694833	169157	T	G	ASIC002403-RA:c.3628T>G	ASIC002403:p.Leu1210Val	23	42	54.7619	31	44	70.4545	0.0581534	0.186979	0.728208
784	AS2_scf7180000694833	170148	G	A	ASIC002403-RA:c.4619G>A	ASIC002403:p.Arg1540Gln	30	46	65.2174	31	50	62	0.159447	0.216806	0.663929
785	AS2_scf7180000694833	170558	C	T	ASIC002403-RA:c.5029C>T	ASIC002403:p.Pro1677Ser	41	66	62.1212	26	44	59.0909	0.149836	0.221267	0.655082
786	AS2_scf7180000694833	170573	A	G	ASIC002403-RA:c.5044A>G	ASIC002403:p.Ser1682Gly	41	52	78.8462	33	41	80.4878	0.200763	0.228429	0.641249
787	AS2_scf7180000694837	30380	C	A	ASIC002417-RA:c.3904G>T	ASIC002417:p.Val1302Leu	23	42	54.7619	31	42	73.8095	0.0353333	0.154412	0.811319
788	AS2_scf7180000694837	31607	C	T	ASIC002417-RA:c.2677G>A	ASIC002417:p.Ala893Thr	23	53	43.3962	11	43	25.5814	0.0335954	0.151769	0.818817
789	AS2_scf7180000694837	32883	T	C	ASIC002417-RA:c.1430A>G	ASIC002417:p.Glu477Gly	40	40	100	43	44	97.7273	0.52381	0.527555	0.277732
790	AS2_scf7180000694837	32886	A	T	ASIC002417-RA:c.1427T>A	ASIC002417:p.Val476Asp	22	40	55	9	45	20	0.000676999	0.0247476	1.60647
791	AS2_scf7180000694837	33244	T	A	ASIC002417-RA:c.1069A>T	ASIC002417:p.Thr357Ser	18	41	43.9024	31	46	67.3913	0.0156116	0.110814	0.955407
792	AS2_scf7180000694837	39294	G	A	ASIC002418-RA:c.115G>A	ASIC002418:p.Val39Ile	35	41	85.3659	32	44	72.7273	0.0786034	0.203418	0.691611
793	AS2_scf7180000694837	39872	G	A	ASIC002418-RA:c.693G>A	ASIC002418:p.Met231Ile	24	51	47.0588	11	41	26.8293	0.024422	0.133063	0.875943
794	AS2_scf7180000694837	41175	T	A	ASIC002418-RA:c.1930T>A	ASIC002418:p.Ser644Thr	43	44	97.7273	36	44	81.8182	0.0136488	0.103634	0.984496
795	AS2_scf7180000694837	41793	G	A	ASIC002418-RA:c.2548G>A	ASIC002418:p.Ala850Thr	29	56	51.7857	12	43	27.907	0.00954403	0.0876121	1.05744
796	AS2_scf7180000694837	41898	A	G	ASIC002418-RA:c.2653A>G	ASIC002418:p.Asn885Asp	30	52	57.6923	12	47	25.5319	0.000862458	0.027796	1.55602
797	AS2_scf7180000694837	51680	C	T	ASIC002419-RA:c.3133G>A	ASIC002419:p.Val1045Ile	43	44	97.7273	43	44	97.7273	0.505747	0.513159	0.289748
798	AS2_scf7180000694837	53531	T	C	ASIC002419-RA:c.1282A>G	ASIC002419:p.Thr428Ala	32	41	78.0488	32	42	76.1905	0.201671	0.229191	0.639802
799	AS2_scf7180000694837	53540	T	G	ASIC002419-RA:c.1273A>C	ASIC002419:p.Met425Leu	36	44	81.8182	29	40	72.5	0.124032	0.222249	0.65316
800	AS2_scf7180000694837	53558	A	T	ASIC002419-RA:c.1255T>A	ASIC002419:p.Leu419Met	24	42	57.1429	17	41	41.4634	0.0638688	0.192869	0.714737
801	AS2_scf7180000694908	7904	C	T	ASIC002436-RA:c.65C>T	ASIC002436:p.Ala22Val	25	52	48.0769	18	40	45	0.159972	0.216637	0.664267
802	AS2_scf7180000694908	7907	T	A	ASIC002436-RA:c.68T>A	ASIC002436:p.Met23Lys	23	48	47.9167	26	41	63.4146	0.0590385	0.188159	0.725476
803	AS2_scf7180000694908	31338	C	A	ASIC002447-RA:c.29C>A	ASIC002447:p.Pro10Gln	12	55	21.8182	27	43	62.7907	3.49126e-05	0.00687315	2.16284
804	AS2_scf7180000694908	31485	A	G	ASIC002447-RA:c.176A>G	ASIC002447:p.His59Arg	38	49	77.551	33	41	80.4878	0.193853	0.222833	0.652021
805	AS2_scf7180000694908	31578	A	T	ASIC002447-RA:c.269A>T	ASIC002447:p.Glu90Val	30	44	68.1818	21	41	51.2195	0.0502919	0.178957	0.747252
806	AS2_scf7180000694908	109559	A	G	ASIC002450-RA:c.1045A>G	ASIC002450:p.Ser349Gly	29	46	63.0435	41	62	66.129	0.152375	0.220337	0.656913
807	AS2_scf7180000694908	109621	T	G	ASIC002450-RA:c.1107T>G	ASIC002450:p.His369Gln	24	50	48	27	51	52.9412	0.13967	0.223723	0.650289
808	AS2_scf7180000694908	109632	A	G	ASIC002450-RA:c.1118A>G	ASIC002450:p.Glu373Gly	20	42	47.619	31	49	63.2653	0.0555702	0.185234	0.732279
809	AS2_scf7180000694908	142265	T	G	ASIC002427-RA:c.1166A>C	ASIC002427:p.Gln389Pro	46	46	100	39	41	95.122	0.219193	0.244395	0.611908
810	AS2_scf7180000694908	153952	A	G	ASIC002430-RA:c.32A>G	ASIC002430:p.Lys11Arg	46	48	95.8333	40	40	100	0.294671	0.313003	0.504452
811	AS2_scf7180000694908	167688	A	C	ASIC002434-RA:c.389A>C	ASIC002434:p.Gln130Pro	42	47	89.3617	48	55	87.2727	0.230408	0.254142	0.594923
812	AS2_scf7180000694908	167739	T	A	ASIC002434-RA:c.440T>A	ASIC002434:p.Met147Lys	38	40	95	44	48	91.6667	0.280058	0.299036	0.524276
813	AS2_scf7180000694908	181262	T	C	ASIC002439-RA:c.499A>G	ASIC002439:p.Ser167Gly	29	42	69.0476	24	40	60	0.127531	0.22261	0.652455
814	AS2_scf7180000694908	214815	T	A	ASIC002440-RA:c.1945T>A	ASIC002440:p.Leu649Met	15	52	28.8462	23	43	53.4884	0.00883292	0.0842065	1.07465
815	AS2_scf7180000694908	214821	A	C	ASIC002440-RA:c.1951A>C	ASIC002440:p.Thr651Pro	31	47	65.9574	26	51	50.9804	0.0536057	0.184016	0.735144
816	AS2_scf7180000694908	214821	A	G	ASIC002440-RA:c.1951A>G	ASIC002440:p.Thr651Ala	16	47	34.0426	25	51	49.0196	0.0536057	0.183977	0.735236
817	AS2_scf7180000694908	217595	A	T	ASIC002440-RA:c.2110A>T	ASIC002440:p.Thr704Ser	36	42	85.7143	34	55	61.8182	0.00598726	0.0701807	1.15378
818	AS2_scf7180000694908	220714	C	T	ASIC002441-RA:c.337G>A	ASIC002441:p.Asp113Asn	17	45	37.7778	19	51	37.2549	0.166848	0.212212	0.673229
819	AS2_scf7180000694908	236412	T	C	ASIC002444-RA:c.337A>G	ASIC002444:p.Thr113Ala	40	43	93.0233	37	40	92.5	0.323036	0.340279	0.468165
820	AS2_scf7180000694908	238432	A	G	ASIC002445-RA:c.184A>G	ASIC002445:p.Ile62Val	16	41	39.0244	15	41	36.5854	0.175434	0.209853	0.678084
821	AS2_scf7180000694910	13305	C	T	ASIC002473-RA:c.332G>A	ASIC002473:p.Gly111Glu	22	42	52.381	21	45	46.6667	0.147732	0.221707	0.654221
822	AS2_scf7180000694910	16346	C	T	ASIC002474-RA:c.6964G>A	ASIC002474:p.Ala2322Thr	23	41	56.0976	11	56	19.6429	0.000183128	0.0134184	1.8723
823	AS2_scf7180000694910	24530	G	C	ASIC002474-RA:c.4331C>G	ASIC002474:p.Ala1444Gly	11	41	26.8293	27	40	67.5	0.000207229	0.013709	1.863
824	AS2_scf7180000694910	24833	G	C	ASIC002474-RA:c.4028C>G	ASIC002474:p.Ala1343Gly	32	47	68.0851	35	44	79.5455	0.089182	0.209795	0.678205
825	AS2_scf7180000694910	25941	C	T	ASIC002474-RA:c.2920G>A	ASIC002474:p.Ala974Thr	12	46	26.087	24	44	54.5455	0.00396054	0.0579886	1.23666
826	AS2_scf7180000694910	29021	G	A	ASIC002474-RA:c.1474C>T	ASIC002474:p.Arg492Cys	43	83	51.8072	22	65	33.8462	0.0123751	0.0991708	1.00362
827	AS2_scf7180000694910	29645	T	C	ASIC002474-RA:c.850A>G	ASIC002474:p.Thr284Ala	24	42	57.1429	24	46	52.1739	0.152398	0.220292	0.657001
828	AS2_scf7180000694910	29720	T	C	ASIC002474-RA:c.775A>G	ASIC002474:p.Thr259Ala	23	42	54.7619	13	48	27.0833	0.00498198	0.0649686	1.1873
829	AS2_scf7180000694910	29839	G	C	ASIC002474-RA:c.656C>G	ASIC002474:p.Ala219Gly	19	47	40.4255	16	40	40	0.173306	0.209469	0.67888
830	AS2_scf7180000694910	33346	G	C	ASIC002475-RA:c.15G>C	ASIC002475:p.Glu5Asp	23	41	56.0976	19	44	43.1818	0.0857975	0.20828	0.681353
831	AS2_scf7180000694910	33384	T	C	ASIC002475-RA:c.53T>C	ASIC002475:p.Val18Ala	37	44	84.0909	39	44	88.6364	0.202639	0.230067	0.638145
832	AS2_scf7180000694910	33461	A	G	ASIC002475-RA:c.130A>G	ASIC002475:p.Thr44Ala	40	41	97.561	48	52	92.3077	0.213574	0.239618	0.62048
833	AS2_scf7180000694910	34883	C	G	ASIC002475-RA:c.1552C>G	ASIC002475:p.Pro518Ala	36	49	73.4694	41	59	69.4915	0.153244	0.219958	0.65766
834	AS2_scf7180000694910	47969	C	G	ASIC002476-RA:c.1959C>G	ASIC002476:p.His653Gln	8	44	18.1818	26	53	49.0566	0.00104985	0.0297821	1.52605
835	AS2_scf7180000694910	48007	C	T	ASIC002476-RA:c.1997C>T	ASIC002476:p.Ala666Val	19	44	43.1818	30	53	56.6038	0.0689446	0.196332	0.707008
836	AS2_scf7180000694910	48040	T	C	ASIC002476-RA:c.2030T>C	ASIC002476:p.Val677Ala	16	43	37.2093	22	46	47.8261	0.102829	0.217055	0.663431
837	AS2_scf7180000694910	48062	C	A	ASIC002476-RA:c.2052C>A	ASIC002476:p.Asn684Lys	40	52	76.9231	29	45	64.4444	0.0723811	0.199378	0.700324
838	AS2_scf7180000694910	48418	A	C	ASIC002476-RA:c.2408A>C	ASIC002476:p.Glu803Ala	45	59	76.2712	29	44	65.9091	0.0903007	0.210697	0.676341
839	AS2_scf7180000694910	48763	C	A	ASIC002476-RA:c.2753C>A	ASIC002476:p.Pro918Gln	37	43	86.0465	38	47	80.8511	0.1814	0.213043	0.671532
840	AS2_scf7180000694910	48775	C	T	ASIC002476-RA:c.2765C>T	ASIC002476:p.Thr922Ile	12	47	25.5319	22	49	44.898	0.0243301	0.132961	0.876275
841	AS2_scf7180000694910	66495	G	A	ASIC002456-RA:c.139G>A	ASIC002456:p.Asp47Asn	18	49	36.7347	16	47	34.0426	0.162727	0.21523	0.667097
842	AS2_scf7180000694910	66506	A	T	ASIC002456-RA:c.150A>T	ASIC002456:p.Glu50Asp	40	42	95.2381	50	50	100	0.205686	0.232685	0.633232
843	AS2_scf7180000694910	66549	C	A	ASIC002456-RA:c.193C>A	ASIC002456:p.His65Asn	23	43	53.4884	16	56	28.5714	0.00727592	0.0775023	1.11069
844	AS2_scf7180000694910	66549	C	T	ASIC002456-RA:c.193C>T	ASIC002456:p.His65Tyr	20	43	46.5116	40	56	71.4286	0.00727592	0.0774518	1.11097
845	AS2_scf7180000694910	66564	T	A	ASIC002456-RA:c.208T>A	ASIC002456:p.Ser70Thr	26	42	61.9048	21	55	38.1818	0.0114607	0.0950117	1.02222
846	AS2_scf7180000694910	66577	C	T	ASIC002456-RA:c.221C>T	ASIC002456:p.Ala74Val	20	43	46.5116	15	53	28.3019	0.031754	0.148161	0.829266
847	AS2_scf7180000694910	68747	T	C	ASIC002457-RA:c.1396T>C	ASIC002457:p.Ser466Pro	31	48	64.5833	19	40	47.5	0.0477878	0.17567	0.755303
848	AS2_scf7180000694910	97355	G	A	ASIC002459-RA:c.124C>T	ASIC002459:p.Pro42Ser	26	43	60.4651	20	43	46.5116	0.0749722	0.200959	0.696893
849	AS2_scf7180000694910	113815	T	A	ASIC002461-RA:c.373A>T	ASIC002461:p.Ile125Phe	47	54	87.037	31	51	60.7843	0.00156577	0.0359335	1.4445
850	AS2_scf7180000694910	114010	T	C	ASIC002461-RA:c.178A>G	ASIC002461:p.Ile60Val	38	42	90.4762	30	40	75	0.0431527	0.167965	0.774782
851	AS2_scf7180000694910	115633	A	T	ASIC002462-RA:c.490A>T	ASIC002462:p.Thr164Ser	25	58	43.1034	14	46	30.4348	0.0683832	0.195791	0.708206
852	AS2_scf7180000694910	117904	A	G	ASIC002463-RA:c.1141A>G	ASIC002463:p.Thr381Ala	24	40	60	17	43	39.5349	0.0315342	0.147853	0.830169
853	AS2_scf7180000694910	117985	C	A	ASIC002463-RA:c.1222C>A	ASIC002463:p.Leu408Met	14	40	35	21	43	48.8372	0.0793763	0.203708	0.690992
854	AS2_scf7180000694910	126788	T	C	ASIC002464-RA:c.268T>C	ASIC002464:p.Ser90Pro	28	59	47.4576	24	55	43.6364	0.137378	0.22307	0.651558
855	AS2_scf7180000694910	131684	C	T	ASIC002466-RA:c.1666G>A	ASIC002466:p.Val556Ile	18	49	36.7347	16	40	40	0.164897	0.213741	0.670111
856	AS2_scf7180000694921	4957	C	T	ASIC002486-RA:c.209G>A	ASIC002486:p.Ser70Asn	35	47	74.4681	27	50	54	0.0190846	0.120449	0.919198
857	AS2_scf7180000694921	8043	A	G	ASIC002487-RA:c.1054A>G	ASIC002487:p.Thr352Ala	29	44	65.9091	16	48	33.3333	0.00128942	0.0330236	1.48118
858	AS2_scf7180000694921	8587	T	G	ASIC002487-RA:c.1526T>G	ASIC002487:p.Val509Gly	21	44	47.7273	36	46	78.2609	0.00194324	0.0409182	1.38808
859	AS2_scf7180000694922	77877	A	C	ASIC002509-RA:c.2927T>G	ASIC002509:p.Leu976Arg	25	51	49.0196	24	45	53.3333	0.148438	0.221504	0.654618
860	AS2_scf7180000694922	80139	T	C	ASIC002509-RA:c.1477A>G	ASIC002509:p.Thr493Ala	36	42	85.7143	32	40	80	0.183486	0.214922	0.667719
861	AS2_scf7180000694922	81917	C	T	ASIC002509-RA:c.289G>A	ASIC002509:p.Ala97Thr	16	48	33.3333	20	42	47.619	0.066961	0.19448	0.711126
862	AS2_scf7180000694922	99937	T	A	ASIC002512-RA:c.107A>T	ASIC002512:p.His36Leu	24	41	58.5366	24	45	53.3333	0.153301	0.220002	0.657574
863	AS2_scf7180000694922	110895	C	T	ASIC002490-RA:c.206C>T	ASIC002490:p.Thr69Met	27	41	65.8537	33	48	68.75	0.171704	0.209612	0.678585
864	AS2_scf7180000694922	117337	T	C	ASIC002492-RA:c.784A>G	ASIC002492:p.Lys262Glu	59	62	95.1613	48	54	88.8889	0.128126	0.222627	0.652422
865	AS2_scf7180000694922	126018	A	G	ASIC002493-RA:c.73T>C	ASIC002493:p.Tyr25His	49	62	79.0323	39	50	78	0.180882	0.21291	0.671804
866	AS2_scf7180000694922	127283	C	G	ASIC002494-RA:c.56G>C	ASIC002494:p.Arg19Pro	39	47	82.9787	48	51	94.1176	0.058446	0.187367	0.727308
867	AS2_scf7180000694922	127292	G	A	ASIC002494-RA:c.47C>T	ASIC002494:p.Thr16Ile	37	44	84.0909	47	50	94	0.0830729	0.207523	0.682933
868	AS2_scf7180000694922	140886	A	G	ASIC002497-RA:c.2068A>G	ASIC002497:p.Thr690Ala	11	40	27.5	19	43	44.186	0.0531835	0.183531	0.736291
869	AS2_scf7180000694922	141639	A	G	ASIC002497-RA:c.2704A>G	ASIC002497:p.Lys902Glu	38	43	88.3721	47	51	92.1569	0.226152	0.250429	0.601315
870	AS2_scf7180000694922	142428	G	A	ASIC002497-RA:c.3493G>A	ASIC002497:p.Ala1165Thr	34	58	58.6207	24	46	52.1739	0.127158	0.222721	0.652239
871	AS2_scf7180000694922	142456	C	T	ASIC002497-RA:c.3521C>T	ASIC002497:p.Thr1174Ile	16	49	32.6531	18	47	38.2979	0.14331	0.222976	0.651742
872	AS2_scf7180000694922	142458	G	T	ASIC002497-RA:c.3523G>T	ASIC002497:p.Ala1175Ser	46	49	93.8776	45	46	97.8261	0.266214	0.286067	0.543532
873	AS2_scf7180000694922	142467	G	T	ASIC002497-RA:c.3532G>T	ASIC002497:p.Ala1178Ser	49	51	96.0784	46	47	97.8723	0.393995	0.410395	0.386798
874	AS2_scf7180000694922	155441	G	A	ASIC002501-RA:c.109G>A	ASIC002501:p.Val37Ile	18	40	45	31	52	59.6154	0.0643142	0.193321	0.713721
875	AS2_scf7180000694939	24562	G	A	ASIC002529-RA:c.1879G>A	ASIC002529:p.Asp627Asn	13	44	29.5455	28	57	49.1228	0.0230484	0.130541	0.884254
876	AS2_scf7180000694950	21380	G	A	ASIC002543-RA:c.553C>T	ASIC002543:p.Pro185Ser	26	48	54.1667	44	60	73.3333	0.0193779	0.121084	0.916914
877	AS2_scf7180000694950	21385	T	C	ASIC002543-RA:c.548A>G	ASIC002543:p.Asn183Ser	24	46	52.1739	42	55	76.3636	0.00683284	0.0753365	1.12299
878	AS2_scf7180000694950	25021	A	G	ASIC002543-RA:c.37T>C	ASIC002543:p.Ser13Pro	24	46	52.1739	28	40	70	0.0433288	0.168409	0.773634
879	AS2_scf7180000694950	25033	G	A	ASIC002543-RA:c.25C>T	ASIC002543:p.Pro9Ser	30	46	65.2174	30	43	69.7674	0.161628	0.215786	0.665977
880	AS2_scf7180000694950	32955	T	C	ASIC002545-RA:c.109A>G	ASIC002545:p.Ile37Val	51	53	96.2264	43	43	100	0.302193	0.320368	0.494351
881	AS2_scf7180000694950	64648	T	A	ASIC002547-RA:c.704A>T	ASIC002547:p.Tyr235Phe	45	45	100	52	55	94.5455	0.162245	0.215483	0.666588
882	AS2_scf7180000694956	1182	T	C	ASIC002558-RA:c.691A>G	ASIC002558:p.Thr231Ala	49	67	73.1343	33	58	56.8966	0.0249311	0.134713	0.870589
883	AS2_scf7180000694956	1188	G	T	ASIC002558-RA:c.685C>A	ASIC002558:p.Gln229Lys	26	71	36.6197	24	59	40.678	0.128359	0.222724	0.652233
884	AS2_scf7180000694956	1200	T	C	ASIC002558-RA:c.673A>G	ASIC002558:p.Asn225Asp	37	64	57.8125	23	51	45.098	0.0601759	0.189456	0.722492
885	AS2_scf7180000694956	1386	C	T	ASIC002558-RA:c.487G>A	ASIC002558:p.Ala163Thr	37	72	51.3889	32	67	47.7612	0.123112	0.221621	0.654389
886	AS2_scf7180000694956	1517	C	T	ASIC002558-RA:c.356G>A	ASIC002558:p.Arg119Gln	49	78	62.8205	23	52	44.2308	0.016537	0.114159	0.94249
887	AS2_scf7180000694956	1545	A	G	ASIC002558-RA:c.328T>C	ASIC002558:p.Ser110Pro	35	71	49.2958	21	42	50	0.153802	0.219678	0.658213
888	AS2_scf7180000694956	25436	T	G	ASIC002571-RA:c.329T>G	ASIC002571:p.Leu110Arg	17	53	32.0755	21	48	43.75	0.0793113	0.203701	0.691007
889	AS2_scf7180000694956	31532	A	C	ASIC002573-RA:c.178A>C	ASIC002573:p.Ile60Leu	25	44	56.8182	25	45	55.5556	0.167829	0.211387	0.674921
890	AS2_scf7180000694956	31566	T	C	ASIC002573-RA:c.212T>C	ASIC002573:p.Val71Ala	38	40	95	35	42	83.3333	0.0718067	0.199138	0.700846
891	AS2_scf7180000694956	31991	C	A	ASIC002573-RA:c.637C>A	ASIC002573:p.Leu213Met	19	42	45.2381	30	53	56.6038	0.0902473	0.210633	0.676474
892	AS2_scf7180000694956	36651	A	C	ASIC002575-RA:c.781T>G	ASIC002575:p.Leu261Val	17	62	27.4194	19	40	47.5	0.0204506	0.123856	0.907083
893	AS2_scf7180000694956	78466	A	G	ASIC002565-RA:c.142A>G	ASIC002565:p.Asn48Asp	38	76	50	30	62	48.3871	0.133458	0.222976	0.651742
894	AS2_scf7180000694956	82220	G	A	ASIC002567-RA:c.86G>A	ASIC002567:p.Gly29Glu	21	45	46.6667	16	48	33.3333	0.0719842	0.198989	0.701172
895	AS2_scf7180000694956	85264	A	C	ASIC002568-RA:c.5570T>G	ASIC002568:p.Val1857Gly	21	51	41.1765	24	50	48	0.12553	0.222686	0.652308
896	AS2_scf7180000694956	88049	T	C	ASIC002568-RA:c.3211A>G	ASIC002568:p.Ile1071Val	33	42	78.5714	39	48	81.25	0.197329	0.225669	0.646528
897	AS2_scf7180000694956	89006	G	A	ASIC002568-RA:c.2254C>T	ASIC002568:p.Pro752Ser	20	54	37.037	19	41	46.3415	0.110395	0.219341	0.65888
898	AS2_scf7180000694956	89721	G	C	ASIC002568-RA:c.1539C>G	ASIC002568:p.His513Gln	18	40	45	17	42	40.4762	0.162321	0.215496	0.66656
899	AS2_scf7180000694963	17286	G	T	ASIC002582-RA:c.606G>T	ASIC002582:p.Glu202Asp	16	40	40	27	50	54	0.0714161	0.198594	0.702034
900	AS2_scf7180000694963	17743	T	C	ASIC002582-RA:c.1063T>C	ASIC002582:p.Ser355Pro	36	40	90	46	54	85.1852	0.19912	0.22697	0.644031
901	AS2_scf7180000694963	17755	C	G	ASIC002582-RA:c.1075C>G	ASIC002582:p.Pro359Ala	14	49	28.5714	30	58	51.7241	0.00843327	0.0823668	1.08425
902	AS2_scf7180000694963	20608	A	C	ASIC002582-RA:c.2558A>C	ASIC002582:p.Gln853Pro	23	40	57.5	16	43	37.2093	0.0323375	0.149348	0.8258
903	AS2_scf7180000694963	31473	G	A	ASIC002584-RA:c.2617G>A	ASIC002584:p.Val873Ile	39	49	79.5918	28	51	54.902	0.00548779	0.067523	1.17055
904	AS2_scf7180000694963	53838	T	A	ASIC002587-RA:c.2T>A	ASIC002587:p.Met1?	13	41	31.7073	27	47	57.4468	0.00939331	0.0867646	1.06166
905	AS2_scf7180000694963	56576	C	G	ASIC002588-RA:c.472C>G	ASIC002588:p.Leu158Val	40	45	88.8889	37	51	72.549	0.0281271	0.141241	0.85004
906	AS2_scf7180000694963	60219	C	A	ASIC002588-RA:c.2837C>A	ASIC002588:p.Thr946Lys	24	40	60	26	47	55.3191	0.156681	0.218425	0.660697
907	AS2_scf7180000694971	15407	T	C	ASIC002592-RA:c.416T>C	ASIC002592:p.Val139Ala	17	40	42.5	15	41	36.5854	0.155402	0.219016	0.659525
908	AS2_scf7180000694971	15410	G	A	ASIC002592-RA:c.419G>A	ASIC002592:p.Gly140Asp	17	40	42.5	18	44	40.9091	0.173251	0.209418	0.678985
909	AS2_scf7180000694971	15549	T	A	ASIC002592-RA:c.558T>A	ASIC002592:p.Asn186Lys	19	44	43.1818	20	44	45.4545	0.165964	0.212695	0.672243
910	AS2_scf7180000694971	16492	G	C	ASIC002592-RA:c.1501G>C	ASIC002592:p.Glu501Gln	21	48	43.75	20	44	45.4545	0.163931	0.21405	0.669484
911	AS2_scf7180000694971	16528	A	C	ASIC002592-RA:c.1537A>C	ASIC002592:p.Thr513Pro	34	54	62.963	37	44	84.0909	0.0120987	0.0978676	1.00936
912	AS2_scf7180000694971	16715	T	C	ASIC002592-RA:c.1724T>C	ASIC002592:p.Met575Thr	37	53	69.8113	39	45	86.6667	0.0271823	0.139585	0.855163
913	AS2_scf7180000694971	16729	A	G	ASIC002592-RA:c.1738A>G	ASIC002592:p.Thr580Ala	30	42	71.4286	36	46	78.2609	0.148693	0.221582	0.654466
914	AS2_scf7180000694971	34165	G	A	ASIC002593-RA:c.427C>T	ASIC002593:p.Leu143Phe	17	40	42.5	13	44	29.5455	0.0851086	0.208497	0.6809
915	AS2_scf7180000694971	62264	C	A	ASIC002595-RA:c.107C>A	ASIC002595:p.Ala36Glu	38	44	86.3636	29	43	67.4419	0.0232916	0.131281	0.881797
916	AS2_scf7180000694980	2258	A	G	ASIC002607-RA:c.14A>G	ASIC002607:p.Asp5Gly	106	136	77.9412	85	110	77.2727	0.121113	0.221165	0.655283
917	AS2_scf7180000694980	2303	A	C	ASIC002607-RA:c.59A>C	ASIC002607:p.Glu20Ala	143	181	79.0055	99	119	83.1933	0.0806919	0.205311	0.687588
918	AS2_scf7180000694980	2351	G	T	ASIC002607-RA:c.107G>T	ASIC002607:p.Arg36Leu	151	191	79.0576	106	131	80.916	0.104039	0.217753	0.662036
919	AS2_scf7180000694980	2356	G	A	ASIC002607-RA:c.112G>A	ASIC002607:p.Asp38Asn	150	189	79.3651	109	134	81.3433	0.102931	0.21699	0.66356
920	AS2_scf7180000694980	2412	G	T	ASIC002607-RA:c.168G>T	ASIC002607:p.Met56Ile	183	232	78.8793	161	188	85.6383	0.0206489	0.124	0.90658
921	AS2_scf7180000694980	2465	T	C	ASIC002607-RA:c.221T>C	ASIC002607:p.Val74Ala	199	237	83.9662	158	184	85.8696	0.0947324	0.213301	0.671006
922	AS2_scf7180000694980	2485	A	G	ASIC002607-RA:c.241A>G	ASIC002607:p.Lys81Glu	190	203	93.5961	160	173	92.4855	0.14699	0.222061	0.653528
923	AS2_scf7180000694980	2518	T	C	ASIC002607-RA:c.274T>C	ASIC002607:p.Cys92Arg	151	177	85.3107	119	153	77.7778	0.0240921	0.13304	0.876019
924	AS2_scf7180000694980	2567	A	C	ASIC002607-RA:c.323A>C	ASIC002607:p.Gln108Pro	123	145	84.8276	102	126	80.9524	0.0899761	0.210541	0.676663
925	AS2_scf7180000694980	2597	A	G	ASIC002607-RA:c.353A>G	ASIC002607:p.Lys118Arg	125	149	83.8926	94	119	78.9916	0.0741938	0.200351	0.698208
926	AS2_scf7180000694980	2613	G	A	ASIC002607-RA:c.369G>A	ASIC002607:p.Trp123*	101	125	80.8	80	106	75.4717	0.0788896	0.203449	0.691544
927	AS2_scf7180000694985	15294	G	A	ASIC002611-RA:c.524C>T	ASIC002611:p.Ser175Leu	28	54	51.8519	17	40	42.5	0.111476	0.219354	0.658854
928	AS2_scf7180000694985	43686	G	A	ASIC002644-RA:c.740C>T	ASIC002644:p.Thr247Met	16	42	38.0952	17	47	36.1702	0.170702	0.210194	0.677379
929	AS2_scf7180000694985	43692	C	T	ASIC002644-RA:c.734G>A	ASIC002644:p.Arg245His	17	47	36.1702	23	48	47.9167	0.0851009	0.208603	0.680679
930	AS2_scf7180000694985	43750	T	C	ASIC002644-RA:c.676A>G	ASIC002644:p.Ser226Gly	31	51	60.7843	20	49	40.8163	0.022166	0.1283	0.891772
931	AS2_scf7180000694985	48638	G	A	ASIC002655-RA:c.88G>A	ASIC002655:p.Gly30Arg	14	42	33.3333	17	43	39.5349	0.150012	0.221227	0.655163
932	AS2_scf7180000694985	56042	A	G	ASIC002677-RA:c.19A>G	ASIC002677:p.Thr7Ala	24	40	60	36	41	87.8049	0.00345413	0.0540617	1.26711
933	AS2_scf7180000694985	56110	T	G	ASIC002677-RA:c.87T>G	ASIC002677:p.His29Gln	40	42	95.2381	43	44	97.7273	0.370178	0.387961	0.411212
934	AS2_scf7180000694985	111670	G	A	ASIC002612-RA:c.979G>A	ASIC002612:p.Gly327Ser	26	47	55.3191	34	46	73.913	0.030506	0.145284	0.837783
935	AS2_scf7180000694985	142726	C	T	ASIC002613-RA:c.78G>A	ASIC002613:p.Met26Ile	28	46	60.8696	29	42	69.0476	0.129244	0.222369	0.652925
936	AS2_scf7180000694985	159809	A	G	ASIC002616-RA:c.118A>G	ASIC002616:p.Thr40Ala	31	40	77.5	32	41	78.0488	0.209759	0.236246	0.626636
937	AS2_scf7180000694985	159957	T	G	ASIC002616-RA:c.266T>G	ASIC002616:p.Leu89Arg	17	47	36.1702	15	41	36.5854	0.175383	0.209884	0.678021
938	AS2_scf7180000694985	159978	A	G	ASIC002616-RA:c.287A>G	ASIC002616:p.Asn96Ser	36	44	81.8182	22	43	51.1628	0.00183853	0.0395283	1.40309
939	AS2_scf7180000694985	163001	C	T	ASIC002617-RA:c.40C>T	ASIC002617:p.Leu14Phe	24	40	60	29	49	59.1837	0.171209	0.209807	0.678181
940	AS2_scf7180000694985	163054	A	T	ASIC002617-RA:c.93A>T	ASIC002617:p.Gln31His	20	40	50	24	49	48.9796	0.167829	0.21142	0.674854
941	AS2_scf7180000694985	163491	C	T	ASIC002617-RA:c.530C>T	ASIC002617:p.Ser177Phe	15	41	36.5854	16	43	37.2093	0.178409	0.211292	0.675116
942	AS2_scf7180000694985	163646	A	G	ASIC002617-RA:c.685A>G	ASIC002617:p.Asn229Asp	13	42	30.9524	18	44	40.9091	0.113214	0.219705	0.658161
943	AS2_scf7180000694985	209471	A	C	ASIC002619-RA:c.1417A>C	ASIC002619:p.Lys473Gln	26	41	63.4146	28	48	58.3333	0.153395	0.219943	0.657689
944	AS2_scf7180000694985	211218	G	A	ASIC002619-RA:c.3164G>A	ASIC002619:p.Arg1055Gln	19	47	40.4255	21	50	42	0.161388	0.215959	0.665629
945	AS2_scf7180000694985	213112	A	G	ASIC002620-RA:c.283A>G	ASIC002620:p.Lys95Glu	50	51	98.0392	42	45	93.3333	0.21785	0.24333	0.613804
946	AS2_scf7180000694985	221782	T	C	ASIC002623-RA:c.1036A>G	ASIC002623:p.Asn346Asp	18	42	42.8571	27	46	58.6957	0.0572505	0.186312	0.729759
947	AS2_scf7180000694985	221839	A	G	ASIC002623-RA:c.979T>C	ASIC002623:p.Ser327Pro	20	46	43.4783	14	48	29.1667	0.0611119	0.190748	0.719539
948	AS2_scf7180000694985	221885	C	G	ASIC002623-RA:c.933G>C	ASIC002623:p.Trp311Cys	32	52	61.5385	28	44	63.6364	0.163882	0.214089	0.669406
949	AS2_scf7180000694985	222454	T	G	ASIC002623-RA:c.433A>C	ASIC002623:p.Lys145Gln	59	59	100	38	40	95	0.160792	0.215957	0.665632
950	AS2_scf7180000694985	252176	G	A	ASIC002630-RA:c.211C>T	ASIC002630:p.Pro71Ser	36	44	81.8182	29	46	63.0435	0.0267021	0.138865	0.857408
951	AS2_scf7180000694985	252272	C	A	ASIC002630-RA:c.115G>T	ASIC002630:p.Val39Leu	14	44	31.8182	20	47	42.5532	0.0993167	0.215144	0.66727
952	AS2_scf7180000694985	263854	C	T	ASIC002631-RA:c.3896G>A	ASIC002631:p.Arg1299Gln	27	46	58.6957	20	45	44.4444	0.0669613	0.194411	0.711278
953	AS2_scf7180000694985	265398	C	A	ASIC002631-RA:c.2786G>T	ASIC002631:p.Arg929Leu	20	45	44.4444	16	41	39.0244	0.152586	0.220271	0.657042
954	AS2_scf7180000694985	266390	G	T	ASIC002631-RA:c.2191C>A	ASIC002631:p.Leu731Met	23	42	54.7619	13	50	26	0.00337121	0.0535331	1.27138
955	AS2_scf7180000694985	266408	T	G	ASIC002631-RA:c.2173A>C	ASIC002631:p.Thr725Pro	16	40	40	31	47	65.9574	0.00945884	0.0869766	1.0606
956	AS2_scf7180000694985	266425	C	T	ASIC002631-RA:c.2156G>A	ASIC002631:p.Gly719Asp	20	42	47.619	31	47	65.9574	0.0379564	0.159069	0.798416
957	AS2_scf7180000694985	266531	A	T	ASIC002631-RA:c.2050T>A	ASIC002631:p.Ser684Thr	26	40	65	33	45	73.3333	0.132509	0.222964	0.651765
958	AS2_scf7180000694985	266534	A	G	ASIC002631-RA:c.2047T>C	ASIC002631:p.Ser683Pro	14	41	34.1463	17	46	36.9565	0.171029	0.209995	0.677791
959	AS2_scf7180000694985	268489	C	T	ASIC002631-RA:c.1367G>A	ASIC002631:p.Gly456Asp	18	47	38.2979	15	41	36.5854	0.172251	0.209465	0.678889
960	AS2_scf7180000694985	268535	T	C	ASIC002631-RA:c.1357A>G	ASIC002631:p.Arg453Gly	23	47	48.9362	29	41	70.7317	0.0206016	0.123943	0.906777
961	AS2_scf7180000694985	272887	T	C	ASIC002632-RA:c.1237T>C	ASIC002632:p.Phe413Leu	19	41	46.3415	36	45	80	0.000934292	0.0283761	1.54705
962	AS2_scf7180000694985	272889	C	G	ASIC002632-RA:c.1239C>G	ASIC002632:p.Phe413Leu	17	41	41.4634	31	45	68.8889	0.00677898	0.0750464	1.12467
963	AS2_scf7180000694985	272898	C	G	ASIC002632-RA:c.1248C>G	ASIC002632:p.Ile416Met	21	44	47.7273	33	41	80.4878	0.00129575	0.032979	1.48176
964	AS2_scf7180000694985	274093	C	T	ASIC002634-RA:c.356C>T	ASIC002634:p.Thr119Ile	20	43	46.5116	19	48	39.5833	0.134915	0.223106	0.65149
965	AS2_scf7180000694985	276071	A	T	ASIC002635-RA:c.427A>T	ASIC002635:p.Thr143Ser	25	41	60.9756	30	44	68.1818	0.141655	0.223314	0.651085
966	AS2_scf7180000694985	276940	C	A	ASIC002635-RA:c.1234C>A	ASIC002635:p.Leu412Ile	25	41	60.9756	30	40	75	0.0771743	0.202315	0.693972
967	AS2_scf7180000694985	277030	C	A	ASIC002635-RA:c.1324C>A	ASIC002635:p.Leu442Met	35	51	68.6275	30	41	73.1707	0.163664	0.214439	0.668695
968	AS2_scf7180000694985	301208	C	A	ASIC002639-RA:c.370C>A	ASIC002639:p.Pro124Thr	29	43	67.4419	27	44	61.3636	0.149217	0.221594	0.654442
969	AS2_scf7180000694985	344538	A	C	ASIC002642-RA:c.777T>G	ASIC002642:p.Ile259Met	22	47	46.8085	10	40	25	0.0199301	0.122428	0.91212
970	AS2_scf7180000694985	344687	A	T	ASIC002642-RA:c.628T>A	ASIC002642:p.Leu210Ile	36	41	87.8049	43	44	97.7273	0.0753933	0.201164	0.696451
971	AS2_scf7180000694985	405567	T	C	ASIC002649-RA:c.64A>G	ASIC002649:p.Lys22Glu	21	40	52.5	36	47	76.5957	0.0116618	0.095997	1.01774
972	AS2_scf7180000694985	405575	T	A	ASIC002649-RA:c.56A>T	ASIC002649:p.His19Leu	21	40	52.5	32	43	74.4186	0.0217023	0.126875	0.896624
973	AS2_scf7180000694985	411493	T	C	ASIC002650-RA:c.184A>G	ASIC002650:p.Lys62Glu	47	50	94	35	41	85.3659	0.112443	0.219591	0.658385
974	AS2_scf7180000694985	452451	A	G	ASIC002656-RA:c.433A>G	ASIC002656:p.Thr145Ala	31	50	62	31	40	77.5	0.0536933	0.183931	0.735346
975	AS2_scf7180000694985	508898	A	G	ASIC002658-RA:c.232T>C	ASIC002658:p.Ser78Pro	12	40	30	18	45	40	0.114602	0.219686	0.658198
976	AS2_scf7180000694985	508924	C	T	ASIC002658-RA:c.206G>A	ASIC002658:p.Gly69Asp	21	40	52.5	30	44	68.1818	0.0613316	0.190742	0.719554
977	AS2_scf7180000694985	508968	T	A	ASIC002658-RA:c.162A>T	ASIC002658:p.Leu54Phe	45	46	97.8261	42	43	97.6744	0.505107	0.513274	0.28965
978	AS2_scf7180000694985	509032	A	G	ASIC002658-RA:c.98T>C	ASIC002658:p.Leu33Pro	21	45	46.6667	10	41	24.3902	0.0182309	0.118024	0.92803
979	AS2_scf7180000694985	509733	T	C	ASIC002659-RA:c.221A>G	ASIC002659:p.Asp74Gly	16	47	34.0426	18	46	39.1304	0.149987	0.22127	0.655077
980	AS2_scf7180000694985	510001	G	A	ASIC002659-RA:c.89C>T	ASIC002659:p.Ser30Phe	33	55	60	23	53	43.3962	0.0351089	0.154132	0.812107
981	AS2_scf7180000694985	535266	C	A	ASIC002660-RA:c.177G>T	ASIC002660:p.Lys59Asn	19	42	45.2381	13	43	30.2326	0.0652512	0.193609	0.713074
982	AS2_scf7180000694985	550233	A	C	ASIC002661-RA:c.86T>G	ASIC002661:p.Leu29Arg	16	41	39.0244	17	43	39.5349	0.176429	0.210335	0.677089
983	AS2_scf7180000694985	561471	T	G	ASIC002662-RA:c.1207A>C	ASIC002662:p.Lys403Gln	39	43	90.6977	29	45	64.4444	0.00259587	0.0475522	1.32283
984	AS2_scf7180000694985	561786	A	C	ASIC002662-RA:c.892T>G	ASIC002662:p.Ser298Ala	17	46	36.9565	19	41	46.3415	0.11719	0.220507	0.656578
985	AS2_scf7180000694985	568630	A	C	ASIC002664-RA:c.141T>G	ASIC002664:p.Asp47Glu	36	56	64.2857	35	46	76.087	0.0762343	0.20176	0.695164
986	AS2_scf7180000694985	598793	A	T	ASIC002667-RA:c.232A>T	ASIC002667:p.Thr78Ser	24	47	51.0638	31	43	72.093	0.021839	0.127264	0.895293
987	AS2_scf7180000694985	618537	T	C	ASIC002668-RA:c.266A>G	ASIC002668:p.Gln89Arg	18	40	45	26	47	55.3191	0.108435	0.218608	0.660333
988	AS2_scf7180000694985	618815	G	C	ASIC002668-RA:c.212C>G	ASIC002668:p.Ala71Gly	14	40	35	24	46	52.1739	0.049073	0.177755	0.750178
989	AS2_scf7180000694985	647367	G	A	ASIC002671-RA:c.586C>T	ASIC002671:p.Pro196Ser	15	45	33.3333	21	44	47.7273	0.066862	0.194469	0.71115
990	AS2_scf7180000694985	657217	C	G	ASIC002672-RA:c.2176C>G	ASIC002672:p.Gln726Glu	17	41	41.4634	36	48	75	0.00101732	0.0293693	1.53211
991	AS2_scf7180000694985	660433	C	A	ASIC002673-RA:c.2221G>T	ASIC002673:p.Ala741Ser	23	52	44.2308	24	45	53.3333	0.108887	0.218604	0.660342
992	AS2_scf7180000694985	690048	A	C	ASIC002675-RA:c.140T>G	ASIC002675:p.Val47Gly	46	48	95.8333	44	45	97.7778	0.391166	0.407761	0.389595
993	AS2_scf7180000694985	712088	C	T	ASIC002678-RA:c.20C>T	ASIC002678:p.Ala7Val	40	48	83.3333	26	41	63.4146	0.0204046	0.123945	0.906771
994	AS2_scf7180000694985	741860	C	A	ASIC002682-RA:c.187C>A	ASIC002682:p.His63Asn	10	42	23.8095	21	40	52.5	0.00518311	0.0660624	1.18005
995	AS2_scf7180000694985	749246	G	A	ASIC002683-RA:c.139G>A	ASIC002683:p.Val47Met	22	45	48.8889	15	41	36.5854	0.0902405	0.210677	0.676382
996	AS2_scf7180000694986	2899	A	T	ASIC002687-RA:c.652A>T	ASIC002687:p.Thr218Ser	41	89	46.0674	40	89	44.9438	0.118252	0.221004	0.6556
997	AS2_scf7180000694995	17651	A	T	ASIC002702-RA:c.565A>T	ASIC002702:p.Lys189*	26	61	42.623	28	61	45.9016	0.135384	0.223362	0.650991
998	AS2_scf7180000694995	135571	G	C	ASIC002694-RA:c.53G>C	ASIC002694:p.Arg18Pro	27	45	60	41	47	87.234	0.00227925	0.0439705	1.35684
999	AS2_scf7180000694995	135736	G	C	ASIC002694-RA:c.218G>C	ASIC002694:p.Ser73Thr	23	44	52.2727	37	54	68.5185	0.0438127	0.169484	0.770871
1000	AS2_scf7180000694995	135742	A	G	ASIC002694-RA:c.224A>G	ASIC002694:p.His75Arg	30	43	69.7674	16	55	29.0909	5.12309e-05	0.00804916	2.09425
1001	AS2_scf7180000694995	166822	G	T	ASIC002696-RA:c.1628G>T	ASIC002696:p.Arg543Leu	29	47	61.7021	26	45	57.7778	0.156509	0.218596	0.660358
1002	AS2_scf7180000695001	23442	C	T	ASIC002710-RA:c.383C>T	ASIC002710:p.Ala128Val	43	47	91.4894	45	46	97.8261	0.157872	0.2178	0.661942
1003	AS2_scf7180000695001	23511	T	C	ASIC002710-RA:c.452T>C	ASIC002710:p.Met151Thr	45	49	91.8367	46	46	100	0.0665535	0.194367	0.711377
1004	AS2_scf7180000695001	24166	A	G	ASIC002711-RA:c.1597T>C	ASIC002711:p.Ser533Pro	27	51	52.9412	9	50	18	0.000187232	0.0135972	1.86655
1005	AS2_scf7180000695001	24255	T	A	ASIC002711-RA:c.1508A>T	ASIC002711:p.Lys503Met	55	80	68.75	52	76	68.4211	0.136732	0.223532	0.650661
1006	AS2_scf7180000695001	24276	A	T	ASIC002711-RA:c.1487T>A	ASIC002711:p.Leu496Gln	79	88	89.7727	62	75	82.6667	0.0769925	0.202163	0.694299
1007	AS2_scf7180000695001	24366	T	A	ASIC002711-RA:c.1397A>T	ASIC002711:p.Gln466Leu	38	99	38.3838	35	74	47.2973	0.0623277	0.191832	0.71708
1008	AS2_scf7180000695001	24388	T	C	ASIC002711-RA:c.1375A>G	ASIC002711:p.Asn459Asp	69	74	93.2432	40	66	60.6061	2.35022e-06	0.00166968	2.77737
1009	AS2_scf7180000695001	24404	A	C	ASIC002711-RA:c.1359T>G	ASIC002711:p.His453Gln	43	44	97.7273	54	55	98.1818	0.498866	0.510169	0.292286
1010	AS2_scf7180000695008	46935	T	C	ASIC002717-RA:c.1930A>G	ASIC002717:p.Asn644Asp	59	101	58.4158	52	77	67.5325	0.057888	0.187194	0.727708
1011	AS2_scf7180000695008	47426	T	G	ASIC002717-RA:c.1577A>C	ASIC002717:p.Glu526Ala	23	80	28.75	32	73	43.8356	0.0206943	0.12409	0.906263
1012	AS2_scf7180000695008	47437	G	T	ASIC002717-RA:c.1566C>A	ASIC002717:p.Asp522Glu	39	81	48.1481	44	77	57.1429	0.0671982	0.194408	0.711285
1013	AS2_scf7180000695008	47442	T	C	ASIC002717-RA:c.1561A>G	ASIC002717:p.Ile521Val	39	81	48.1481	47	79	59.4937	0.0452005	0.171205	0.766485
1014	AS2_scf7180000695008	47496	C	T	ASIC002717-RA:c.1507G>A	ASIC002717:p.Val503Met	36	94	38.2979	32	82	39.0244	0.122618	0.221536	0.654556
1015	AS2_scf7180000695008	47550	T	G	ASIC002717-RA:c.1453A>C	ASIC002717:p.Thr485Pro	41	100	41	28	92	30.4348	0.0378691	0.158947	0.798747
1016	AS2_scf7180000695008	47622	T	C	ASIC002717-RA:c.1381A>G	ASIC002717:p.Ile461Val	77	78	98.7179	78	78	100	0.5	0.511168	0.291436
1017	AS2_scf7180000695008	47651	C	T	ASIC002717-RA:c.1352G>A	ASIC002717:p.Cys451Tyr	45	85	52.9412	56	88	63.6364	0.0447277	0.17076	0.767615
1018	AS2_scf7180000695008	47799	T	C	ASIC002717-RA:c.1204A>G	ASIC002717:p.Ile402Val	66	69	95.6522	58	66	87.8788	0.0672445	0.194405	0.711293
1019	AS2_scf7180000695008	50863	C	T	ASIC002717-RA:c.316G>A	ASIC002717:p.Ala106Thr	17	40	42.5	24	53	45.283	0.161284	0.216121	0.665303
1020	AS2_scf7180000695008	50878	G	A	ASIC002717-RA:c.301C>T	ASIC002717:p.His101Tyr	28	46	60.8696	38	50	76	0.0498275	0.178353	0.74872
1021	AS2_scf7180000695008	50922	A	G	ASIC002717-RA:c.257T>C	ASIC002717:p.Val86Ala	26	52	50	23	48	47.9167	0.155212	0.219145	0.659269
1022	AS2_scf7180000695008	59315	T	G	ASIC002719-RA:c.32A>C	ASIC002719:p.Asn11Thr	37	45	82.2222	45	52	86.5385	0.186356	0.2169	0.66374
1023	AS2_scf7180000695008	59318	G	T	ASIC002719-RA:c.29C>A	ASIC002719:p.Thr10Lys	37	45	82.2222	44	51	86.2745	0.190771	0.220296	0.656993
1024	AS2_scf7180000695009	9710	T	A	ASIC002723-RA:c.233A>T	ASIC002723:p.His78Leu	19	46	41.3043	28	44	63.6364	0.0182058	0.118002	0.928111
1025	AS2_scf7180000695009	41078	T	C	ASIC002731-RA:c.1A>G	ASIC002731:p.Met1?	46	51	90.1961	39	41	95.122	0.219875	0.245022	0.610794
1026	AS2_scf7180000695009	45923	T	C	ASIC002732-RA:c.25A>G	ASIC002732:p.Arg9Gly	41	47	87.234	39	40	97.5	0.0735028	0.199806	0.699391
1027	AS2_scf7180000695009	87714	C	A	ASIC002725-RA:c.2510G>T	ASIC002725:p.Gly837Val	25	52	48.0769	11	47	23.4043	0.00657302	0.0739182	1.13125
1028	AS2_scf7180000695018	24005	C	T	ASIC002741-RA:c.92C>T	ASIC002741:p.Ala31Val	33	45	73.3333	21	40	52.5	0.0254409	0.13594	0.866653
1029	AS2_scf7180000695018	63840	T	A	ASIC002744-RA:c.41T>A	ASIC002744:p.Phe14Tyr	26	55	47.2727	27	45	60	0.0723767	0.199399	0.700277
1030	AS2_scf7180000695020	11999	A	G	ASIC002749-RA:c.3556T>C	ASIC002749:p.Ser1186Pro	34	41	82.9268	35	41	85.3659	0.226599	0.250788	0.600694
1031	AS2_scf7180000695020	12719	G	A	ASIC002749-RA:c.2918C>T	ASIC002749:p.Ala973Val	36	45	80	44	50	88	0.127581	0.222507	0.652657
1032	AS2_scf7180000695020	12918	T	G	ASIC002749-RA:c.2719A>C	ASIC002749:p.Lys907Gln	49	55	89.0909	31	40	77.5	0.0718177	0.199	0.701148
1033	AS2_scf7180000695020	12974	G	A	ASIC002749-RA:c.2663C>T	ASIC002749:p.Ala888Val	22	50	44	13	47	27.6596	0.0422062	0.166582	0.778372
1034	AS2_scf7180000695020	13386	G	C	ASIC002749-RA:c.2251C>G	ASIC002749:p.Leu751Val	50	50	100	52	56	92.8571	0.0739358	0.200085	0.698786
1035	AS2_scf7180000695020	13397	G	C	ASIC002749-RA:c.2240C>G	ASIC002749:p.Ala747Gly	41	47	87.234	38	47	80.8511	0.157417	0.218149	0.661247
1036	AS2_scf7180000695020	13605	A	G	ASIC002749-RA:c.2032T>C	ASIC002749:p.Ser678Pro	31	40	77.5	33	44	75	0.195333	0.223998	0.649757
1037	AS2_scf7180000695020	14036	C	A	ASIC002749-RA:c.1601G>T	ASIC002749:p.Arg534Met	24	52	46.1538	17	48	35.4167	0.0899641	0.210543	0.676659
1038	AS2_scf7180000695020	14039	C	T	ASIC002749-RA:c.1598G>A	ASIC002749:p.Arg533Lys	24	55	43.6364	16	46	34.7826	0.10841	0.218585	0.660379
1039	AS2_scf7180000695020	14082	A	C	ASIC002749-RA:c.1555T>G	ASIC002749:p.Ser519Ala	15	43	34.8837	21	44	47.7273	0.0834885	0.207673	0.68262
1040	AS2_scf7180000695020	14121	G	C	ASIC002749-RA:c.1516C>G	ASIC002749:p.Pro506Ala	17	42	40.4762	25	46	54.3478	0.0737036	0.199986	0.699
1041	AS2_scf7180000695020	14144	A	G	ASIC002749-RA:c.1493T>C	ASIC002749:p.Met498Thr	36	43	83.7209	30	47	63.8298	0.02008	0.122933	0.910333
1042	AS2_scf7180000695020	18253	C	A	ASIC002750-RA:c.435G>T	ASIC002750:p.Lys145Asn	21	41	51.2195	15	41	36.5854	0.0735104	0.199794	0.699418
1043	AS2_scf7180000695020	24979	T	C	ASIC002752-RA:c.1081T>C	ASIC002752:p.Phe361Leu	38	44	86.3636	11	43	25.5814	6.12873e-09	3.33811e-05	4.4765
1044	AS2_scf7180000695020	25181	A	G	ASIC002752-RA:c.1283A>G	ASIC002752:p.Asp428Gly	33	43	76.7442	31	42	73.8095	0.188867	0.218763	0.660026
1045	AS2_scf7180000695020	26416	G	A	ASIC002752-RA:c.2257G>A	ASIC002752:p.Val753Ile	21	46	45.6522	11	43	25.5814	0.0258001	0.136476	0.864944
1046	AS2_scf7180000695022	41053	C	G	ASIC002759-RA:c.1185C>G	ASIC002759:p.Asp395Glu	61	62	98.3871	36	42	85.7143	0.0153101	0.109867	0.959132
1047	AS2_scf7180000695023	53828	T	A	ASIC002768-RA:c.473T>A	ASIC002768:p.Val158Glu	48	48	100	48	51	94.1176	0.132771	0.223083	0.651534
1048	AS2_scf7180000695023	77084	G	T	ASIC002762-RA:c.354G>T	ASIC002762:p.Glu118Asp	31	49	63.2653	26	49	53.0612	0.0969477	0.213264	0.671082
1049	AS2_scf7180000695033	4846	C	T	ASIC002771-RA:c.125C>T	ASIC002771:p.Ala42Val	16	41	39.0244	15	42	35.7143	0.170972	0.210067	0.677642
1050	AS2_scf7180000695033	5050	A	G	ASIC002771-RA:c.329A>G	ASIC002771:p.Gln110Arg	28	40	70	26	42	61.9048	0.137733	0.223093	0.651514
1051	AS2_scf7180000695038	56102	C	T	ASIC002783-RA:c.842G>A	ASIC002783:p.Arg281Gln	31	47	65.9574	30	44	68.1818	0.172086	0.209529	0.678756
1052	AS2_scf7180000695038	56353	A	C	ASIC002783-RA:c.653T>G	ASIC002783:p.Phe218Cys	32	42	76.1905	28	48	58.3333	0.0365836	0.156404	0.805753
1053	AS2_scf7180000695039	8346	T	C	ASIC002789-RA:c.185T>C	ASIC002789:p.Val62Ala	33	54	61.1111	40	46	86.9565	0.00254202	0.046934	1.32851
1054	AS2_scf7180000695043	4177	A	G	ASIC002794-RA:c.519A>G	ASIC002794:p.Ile173Met	144	180	80	131	162	80.8642	0.106378	0.218369	0.660809
1055	AS2_scf7180000695043	4224	T	A	ASIC002794-RA:c.566T>A	ASIC002794:p.Val189Asp	225	269	83.6431	197	227	86.7841	0.06295	0.192334	0.715943
1056	AS2_scf7180000695043	4227	A	C	ASIC002794-RA:c.569A>C	ASIC002794:p.Gln190Pro	228	275	82.9091	201	233	86.2661	0.0574269	0.186515	0.729287
1057	AS2_scf7180000695043	4260	C	A	ASIC002794-RA:c.602C>A	ASIC002794:p.Thr201Asn	187	237	78.903	182	220	82.7273	0.0555695	0.185269	0.732196
1058	AS2_scf7180000695043	4274	T	C	ASIC002794-RA:c.616T>C	ASIC002794:p.Phe206Leu	214	247	86.6397	231	252	91.6667	0.0226792	0.1298	0.886725
1059	AS2_scf7180000695043	4283	C	A	ASIC002794-RA:c.625C>A	ASIC002794:p.Arg209Ser	186	233	79.8283	199	242	82.2314	0.0746189	0.200703	0.697446
1060	AS2_scf7180000695044	65413	A	T	ASIC002810-RA:c.391A>T	ASIC002810:p.Thr131Ser	39	40	97.5	36	40	90	0.152063	0.22053	0.656532
1061	AS2_scf7180000695044	102542	C	T	ASIC002799-RA:c.2086G>A	ASIC002799:p.Val696Ile	28	49	57.1429	31	41	75.6098	0.0336027	0.15176	0.818843
1062	AS2_scf7180000695044	113897	A	G	ASIC002801-RA:c.34A>G	ASIC002801:p.Ser12Gly	20	46	43.4783	15	47	31.9149	0.0885072	0.209595	0.678619
1063	AS2_scf7180000695044	114839	A	G	ASIC002801-RA:c.976A>G	ASIC002801:p.Thr326Ala	26	44	59.0909	25	40	62.5	0.168301	0.211232	0.67524
1064	AS2_scf7180000695044	114901	C	A	ASIC002801-RA:c.1038C>A	ASIC002801:p.Asp346Glu	27	46	58.6957	39	44	88.6364	0.00102558	0.0293485	1.53241
1065	AS2_scf7180000695044	116915	T	A	ASIC002802-RA:c.205T>A	ASIC002802:p.Leu69Met	38	42	90.4762	37	52	71.1538	0.0139216	0.104877	0.979319
1066	AS2_scf7180000695044	124462	G	T	ASIC002803-RA:c.326C>A	ASIC002803:p.Pro109Gln	33	55	60	39	42	92.8571	0.000147458	0.0124843	1.90364
1067	AS2_scf7180000695045	6010	C	A	ASIC002812-RA:c.1933C>A	ASIC002812:p.Pro645Thr	34	46	73.913	34	41	82.9268	0.125209	0.222526	0.652619
1068	AS2_scf7180000695045	33901	G	A	ASIC002820-RA:c.430G>A	ASIC002820:p.Gly144Ser	28	48	58.3333	21	43	48.8372	0.111298	0.219214	0.659131
1069	AS2_scf7180000695045	33916	G	A	ASIC002820-RA:c.445G>A	ASIC002820:p.Ala149Thr	20	49	40.8163	13	40	32.5	0.127258	0.222562	0.65255
1070	AS2_scf7180000695045	33977	A	T	ASIC002820-RA:c.506A>T	ASIC002820:p.Lys169Met	23	53	43.3962	15	46	32.6087	0.0907485	0.211019	0.675678
1071	AS2_scf7180000695047	15632	C	A	ASIC002826-RA:c.10C>A	ASIC002826:p.Leu4Met	28	48	58.3333	38	59	64.4068	0.128953	0.222502	0.652667
1072	AS2_scf7180000695047	15644	T	C	ASIC002826-RA:c.22T>C	ASIC002826:p.Phe8Leu	20	47	42.5532	15	53	28.3019	0.0557216	0.185172	0.732425
1073	AS2_scf7180000695047	19418	C	A	ASIC002827-RA:c.222C>A	ASIC002827:p.His74Gln	21	42	50	24	43	55.814	0.149276	0.221461	0.654702
1074	AS2_scf7180000695048	14538	T	C	ASIC002829-RA:c.598A>G	ASIC002829:p.Ser200Gly	32	47	68.0851	31	40	77.5	0.119944	0.221381	0.65486
1075	AS2_scf7180000695048	15419	C	T	ASIC002829-RA:c.28G>A	ASIC002829:p.Val10Ile	19	45	42.2222	22	40	55	0.0872692	0.209272	0.679289
1076	AS2_scf7180000695048	15422	C	T	ASIC002829-RA:c.25G>A	ASIC002829:p.Val9Ile	21	47	44.6809	27	41	65.8537	0.0241542	0.132934	0.876365
1077	AS2_scf7180000695048	18001	T	C	ASIC002833-RA:c.1792A>G	ASIC002833:p.Ile598Val	16	45	35.5556	26	41	63.4146	0.00632324	0.0724557	1.13993
1078	AS2_scf7180000695048	18117	A	T	ASIC002833-RA:c.1676T>A	ASIC002833:p.Ile559Asn	34	43	79.0698	35	41	85.3659	0.171201	0.209859	0.678073
1079	AS2_scf7180000695048	19744	A	T	ASIC002833-RA:c.169T>A	ASIC002833:p.Ser57Thr	16	41	39.0244	21	56	37.5	0.165282	0.213208	0.671197
1080	AS2_scf7180000695048	21365	C	T	ASIC002834-RA:c.584C>T	ASIC002834:p.Thr195Ile	31	48	64.5833	31	46	67.3913	0.165409	0.21312	0.671377
1081	AS2_scf7180000695048	21401	T	A	ASIC002834-RA:c.620T>A	ASIC002834:p.Leu207Gln	41	50	82	37	49	75.5102	0.143306	0.22299	0.651714
1082	AS2_scf7180000695048	22237	C	T	ASIC002834-RA:c.1391C>T	ASIC002834:p.Ala464Val	42	42	100	38	41	92.6829	0.11602	0.220284	0.657018
1083	AS2_scf7180000695048	22699	A	T	ASIC002834-RA:c.1853A>T	ASIC002834:p.Gln618Leu	16	42	38.0952	29	50	58	0.0278834	0.140535	0.852215
1084	AS2_scf7180000695048	22776	G	C	ASIC002834-RA:c.1930G>C	ASIC002834:p.Ala644Pro	49	57	85.9649	53	59	89.8305	0.183917	0.215056	0.667448
1085	AS2_scf7180000695048	49601	C	T	ASIC002837-RA:c.2011G>A	ASIC002837:p.Gly671Ser	21	51	41.1765	17	43	39.5349	0.164859	0.213777	0.670039
1086	AS2_scf7180000695048	50233	A	G	ASIC002837-RA:c.1379T>C	ASIC002837:p.Leu460Ser	29	45	64.4444	19	40	47.5	0.0514876	0.180926	0.742498
1087	AS2_scf7180000695048	50278	G	A	ASIC002837-RA:c.1334C>T	ASIC002837:p.Ala445Val	22	50	44	13	45	28.8889	0.0539306	0.183972	0.735248
1088	AS2_scf7180000695048	81393	A	T	ASIC002837-RA:c.117T>A	ASIC002837:p.Asn39Lys	42	51	82.3529	36	43	83.7209	0.213619	0.239652	0.620419
1089	AS2_scf7180000695048	81395	T	G	ASIC002837-RA:c.115A>C	ASIC002837:p.Asn39His	42	51	82.3529	36	43	83.7209	0.213619	0.239635	0.620449
1090	AS2_scf7180000695048	88216	G	A	ASIC002838-RA:c.362C>T	ASIC002838:p.Pro121Leu	24	44	54.5455	28	50	56	0.162887	0.21506	0.667441
1091	AS2_scf7180000695048	88415	G	A	ASIC002838-RA:c.163C>T	ASIC002838:p.Arg55Cys	15	40	37.5	21	40	52.5	0.0729647	0.199372	0.700336
1092	AS2_scf7180000695048	101825	A	T	ASIC002830-RA:c.46A>T	ASIC002830:p.Asn16Tyr	29	44	65.9091	37	69	53.6232	0.0685431	0.19594	0.707876
1093	AS2_scf7180000695048	111283	C	T	ASIC002831-RA:c.958G>A	ASIC002831:p.Asp320Asn	38	64	59.375	28	52	53.8462	0.12515	0.222471	0.652727
1094	AS2_scf7180000695048	111316	A	T	ASIC002831-RA:c.925T>A	ASIC002831:p.Ser309Thr	37	49	75.5102	31	49	63.2653	0.0743914	0.200587	0.697698
1095	AS2_scf7180000695048	111333	G	T	ASIC002831-RA:c.908C>A	ASIC002831:p.Thr303Asn	31	47	65.9574	26	48	54.1667	0.0844722	0.208312	0.681285
1096	AS2_scf7180000695048	111418	G	A	ASIC002831-RA:c.823C>T	ASIC002831:p.Leu275Phe	23	47	48.9362	14	43	32.5581	0.0500486	0.17887	0.747462
1097	AS2_scf7180000695048	111565	C	G	ASIC002831-RA:c.676G>C	ASIC002831:p.Ala226Pro	28	47	59.5745	35	59	59.322	0.15762	0.217802	0.661939
1098	AS2_scf7180000695052	8296	C	A	ASIC002843-RA:c.25C>A	ASIC002843:p.Pro9Thr	20	46	43.4783	11	40	27.5	0.0558699	0.185213	0.732329
1099	AS2_scf7180000695052	15923	A	G	ASIC002843-RA:c.1033A>G	ASIC002843:p.Thr345Ala	39	56	69.6429	24	46	52.1739	0.0325244	0.149535	0.825256
1100	AS2_scf7180000695052	32440	G	A	ASIC002844-RA:c.209C>T	ASIC002844:p.Thr70Ile	32	43	74.4186	45	61	73.7705	0.179059	0.211633	0.674418
1101	AS2_scf7180000695054	20512	T	C	ASIC002850-RA:c.28T>C	ASIC002850:p.Ser10Pro	29	43	67.4419	31	43	72.093	0.166525	0.212331	0.672987
1102	AS2_scf7180000695056	609	G	C	ASIC002853-RA:c.793C>G	ASIC002853:p.Pro265Ala	22	51	43.1373	16	46	34.7826	0.116689	0.220581	0.656431
1103	AS2_scf7180000695056	41304	G	A	ASIC002911-RA:c.1571C>T	ASIC002911:p.Ala524Val	29	49	59.1837	27	45	60	0.165937	0.212826	0.671974
1104	AS2_scf7180000695056	41307	A	G	ASIC002911-RA:c.1568T>C	ASIC002911:p.Val523Ala	27	47	57.4468	27	45	60	0.1626	0.215342	0.666871
1105	AS2_scf7180000695056	57549	C	G	ASIC002912-RA:c.1776C>G	ASIC002912:p.Asp592Glu	28	42	66.6667	23	40	57.5	0.125849	0.2226	0.652475
1106	AS2_scf7180000695056	61703	G	C	ASIC002854-RA:c.1006C>G	ASIC002854:p.Gln336Glu	38	43	88.3721	30	42	71.4286	0.0333311	0.151118	0.820683
1107	AS2_scf7180000695056	61708	C	T	ASIC002854-RA:c.1001G>A	ASIC002854:p.Ser334Asn	41	45	91.1111	37	43	86.0465	0.201242	0.228831	0.640485
1108	AS2_scf7180000695056	61795	G	A	ASIC002854-RA:c.914C>T	ASIC002854:p.Ala305Val	19	46	41.3043	14	46	30.4348	0.0964775	0.213784	0.670025
1109	AS2_scf7180000695056	61814	G	C	ASIC002854-RA:c.895C>G	ASIC002854:p.Leu299Val	20	47	42.5532	17	42	40.4762	0.167192	0.211728	0.674222
1110	AS2_scf7180000695056	61816	C	T	ASIC002854-RA:c.893G>A	ASIC002854:p.Ser298Asn	40	46	86.9565	34	41	82.9268	0.205796	0.232777	0.633059
1111	AS2_scf7180000695056	61953	T	A	ASIC002854-RA:c.756A>T	ASIC002854:p.Gln252His	28	44	63.6364	32	45	71.1111	0.135587	0.223494	0.650734
1112	AS2_scf7180000695056	61983	T	A	ASIC002854-RA:c.726A>T	ASIC002854:p.Lys242Asn	34	46	73.913	31	40	77.5	0.185055	0.215862	0.665823
1113	AS2_scf7180000695056	62288	A	G	ASIC002854-RA:c.421T>C	ASIC002854:p.Trp141Arg	26	53	49.0566	23	41	56.0976	0.131661	0.222499	0.652673
1114	AS2_scf7180000695056	62305	C	T	ASIC002854-RA:c.404G>A	ASIC002854:p.Gly135Glu	29	58	50	25	41	60.9756	0.0917031	0.211852	0.673968
1115	AS2_scf7180000695056	62491	T	G	ASIC002854-RA:c.218A>C	ASIC002854:p.Asn73Thr	23	46	50	12	52	23.0769	0.00369274	0.0560774	1.25121
1116	AS2_scf7180000695056	62542	A	G	ASIC002854-RA:c.167T>C	ASIC002854:p.Val56Ala	31	52	59.6154	23	48	47.9167	0.0808976	0.205354	0.687496
1117	AS2_scf7180000695056	62590	A	T	ASIC002854-RA:c.119T>A	ASIC002854:p.Leu40Gln	24	43	55.814	21	42	50	0.149276	0.221441	0.654742
1118	AS2_scf7180000695056	65913	G	T	ASIC002855-RA:c.69C>A	ASIC002855:p.Ser23Arg	16	45	35.5556	17	42	40.4762	0.156603	0.218485	0.660578
1119	AS2_scf7180000695056	79851	G	T	ASIC002858-RA:c.1694C>A	ASIC002858:p.Thr565Asn	22	48	45.8333	18	45	40	0.141688	0.223214	0.651278
1120	AS2_scf7180000695056	79899	T	C	ASIC002858-RA:c.1646A>G	ASIC002858:p.Asn549Ser	32	42	76.1905	28	44	63.6364	0.0849327	0.208692	0.680495
1121	AS2_scf7180000695056	79911	G	A	ASIC002858-RA:c.1634C>T	ASIC002858:p.Pro545Leu	20	48	41.6667	20	46	43.4783	0.162576	0.215397	0.66676
1122	AS2_scf7180000695056	80338	T	G	ASIC002858-RA:c.1207A>C	ASIC002858:p.Thr403Pro	21	44	47.7273	22	48	45.8333	0.162844	0.215193	0.667171
1123	AS2_scf7180000695056	96650	A	G	ASIC002862-RA:c.998A>G	ASIC002862:p.Glu333Gly	25	40	62.5	27	46	58.6957	0.164249	0.213902	0.669784
1124	AS2_scf7180000695056	112815	A	C	ASIC002868-RA:c.98A>C	ASIC002868:p.Asn33Thr	42	56	75	36	41	87.8049	0.0622956	0.191841	0.717058
1125	AS2_scf7180000695056	123664	A	T	ASIC002869-RA:c.479T>A	ASIC002869:p.Leu160His	34	43	79.0698	27	42	64.2857	0.0622046	0.19185	0.717038
1126	AS2_scf7180000695056	123887	T	G	ASIC002869-RA:c.256A>C	ASIC002869:p.Met86Leu	32	44	72.7273	39	49	79.5918	0.143228	0.222976	0.651742
1127	AS2_scf7180000695056	203165	T	A	ASIC002873-RA:c.560A>T	ASIC002873:p.Tyr187Phe	48	53	90.566	42	48	87.5	0.221564	0.246584	0.608034
1128	AS2_scf7180000695056	244366	A	G	ASIC002879-RA:c.298T>C	ASIC002879:p.Trp100Arg	28	50	56	28	55	50.9091	0.135742	0.223433	0.650853
1129	AS2_scf7180000695056	320060	C	T	ASIC002880-RA:c.491C>T	ASIC002880:p.Pro164Leu	58	58	100	41	43	95.3488	0.178812	0.211524	0.67464
1130	AS2_scf7180000695056	320153	T	A	ASIC002880-RA:c.518T>A	ASIC002880:p.Phe173Tyr	17	52	32.6923	32	49	65.3061	0.000742404	0.0260879	1.58356
1131	AS2_scf7180000695056	416326	A	G	ASIC002887-RA:c.1903T>C	ASIC002887:p.Ser635Pro	29	46	63.0435	17	42	40.4762	0.0185725	0.11901	0.924417
1132	AS2_scf7180000695056	417454	A	C	ASIC002887-RA:c.775T>G	ASIC002887:p.Leu259Val	27	40	67.5	36	44	81.8182	0.0651812	0.193683	0.712909
1133	AS2_scf7180000695056	435307	G	T	ASIC002891-RA:c.63G>T	ASIC002891:p.Glu21Asp	13	44	29.5455	19	42	45.2381	0.0581534	0.186942	0.728293
1134	AS2_scf7180000695056	440214	G	A	ASIC002894-RA:c.109C>T	ASIC002894:p.Pro37Ser	18	44	40.9091	16	40	40	0.175313	0.209877	0.678034
1135	AS2_scf7180000695056	458973	A	T	ASIC002896-RA:c.29A>T	ASIC002896:p.Tyr10Phe	37	51	72.549	24	44	54.5455	0.0330247	0.150439	0.822641
1136	AS2_scf7180000695056	459716	G	T	ASIC002896-RA:c.680G>T	ASIC002896:p.Gly227Val	28	44	63.6364	34	49	69.3878	0.146876	0.222073	0.653503
1137	AS2_scf7180000695056	462003	T	G	ASIC002898-RA:c.161A>C	ASIC002898:p.Gln54Pro	29	40	72.5	32	42	76.1905	0.185574	0.216266	0.665011
1138	AS2_scf7180000695056	462048	A	T	ASIC002898-RA:c.116T>A	ASIC002898:p.Val39Glu	41	45	91.1111	39	45	86.6667	0.212139	0.238319	0.622841
1139	AS2_scf7180000695056	467329	T	C	ASIC002900-RA:c.11T>C	ASIC002900:p.Leu4Pro	18	46	39.1304	17	45	37.7778	0.168972	0.210876	0.675973
1140	AS2_scf7180000695056	467368	C	T	ASIC002900-RA:c.50C>T	ASIC002900:p.Ser17Leu	35	44	79.5455	40	43	93.0233	0.0493267	0.177964	0.749668
1141	AS2_scf7180000695056	467820	C	T	ASIC002900-RA:c.502C>T	ASIC002900:p.His168Tyr	18	40	45	15	41	36.5854	0.13373	0.22302	0.651656
1142	AS2_scf7180000695056	470651	T	A	ASIC002901-RA:c.47T>A	ASIC002901:p.Ile16Asn	23	40	57.5	28	50	56	0.167704	0.211671	0.67434
1143	AS2_scf7180000695056	470658	C	A	ASIC002901-RA:c.54C>A	ASIC002901:p.Ser18Arg	24	43	55.814	27	46	58.6957	0.163422	0.214725	0.668118
1144	AS2_scf7180000695056	470668	C	T	ASIC002901-RA:c.64C>T	ASIC002901:p.Leu22Phe	23	44	52.2727	29	44	65.9091	0.0748518	0.200867	0.697092
1145	AS2_scf7180000695056	470701	G	A	ASIC002901-RA:c.97G>A	ASIC002901:p.Val33Ile	21	46	45.6522	17	46	36.9565	0.117928	0.221055	0.655499
1146	AS2_scf7180000695056	495977	G	T	ASIC002904-RA:c.1726G>T	ASIC002904:p.Ala576Ser	16	51	31.3725	21	47	44.6809	0.0667376	0.194592	0.710876
1147	AS2_scf7180000695056	495980	G	A	ASIC002904-RA:c.1729G>A	ASIC002904:p.Gly577Ser	16	50	32	19	45	42.2222	0.0999302	0.215247	0.667064
1148	AS2_scf7180000695056	519366	C	T	ASIC002906-RA:c.173C>T	ASIC002906:p.Thr58Ile	27	48	56.25	11	49	22.449	0.000490244	0.0213048	1.67152
1149	AS2_scf7180000695056	531674	G	C	ASIC002909-RA:c.513G>C	ASIC002909:p.Leu171Phe	35	42	83.3333	36	42	85.7143	0.226144	0.250454	0.601272
1150	AS2_scf7180000695059	15897	G	T	ASIC002918-RA:c.850C>A	ASIC002918:p.Leu284Met	24	43	55.814	14	40	35	0.0294572	0.144111	0.841303
1151	AS2_scf7180000695059	27188	A	G	ASIC002921-RA:c.428T>C	ASIC002921:p.Val143Ala	34	45	75.5556	33	43	76.7442	0.195515	0.224127	0.649506
1152	AS2_scf7180000695059	31467	T	C	ASIC002922-RA:c.151T>C	ASIC002922:p.Ser51Pro	36	42	85.7143	32	42	76.1905	0.12085	0.220982	0.655644
1153	AS2_scf7180000695059	31801	T	C	ASIC002922-RA:c.485T>C	ASIC002922:p.Ile162Thr	35	41	85.3659	42	47	89.3617	0.215497	0.241212	0.617601
1154	AS2_scf7180000695059	31813	A	G	ASIC002922-RA:c.497A>G	ASIC002922:p.Asn166Ser	36	42	85.7143	48	51	94.1176	0.113578	0.219837	0.657899
1155	AS2_scf7180000695059	31848	C	G	ASIC002922-RA:c.532C>G	ASIC002922:p.Arg178Gly	40	40	100	53	57	92.9825	0.114005	0.219857	0.65786
1156	AS2_scf7180000695059	31863	C	A	ASIC002922-RA:c.547C>A	ASIC002922:p.Pro183Thr	29	47	61.7021	27	56	48.2143	0.0626482	0.191986	0.716729
1157	AS2_scf7180000695059	32685	A	T	ASIC002922-RA:c.955A>T	ASIC002922:p.Asn319Tyr	28	44	63.6364	34	45	75.5556	0.0878044	0.209265	0.679302
1158	AS2_scf7180000695059	33675	T	G	ASIC002923-RA:c.134A>C	ASIC002923:p.Glu45Ala	15	44	34.0909	25	57	43.8596	0.100303	0.215452	0.66665
1159	AS2_scf7180000695072	16402	C	G	ASIC002941-RA:c.149G>C	ASIC002941:p.Arg50Pro	38	57	66.6667	21	48	43.75	0.0100304	0.0897574	1.04693
1160	AS2_scf7180000695072	16481	T	C	ASIC002941-RA:c.70A>G	ASIC002941:p.Ser24Gly	24	47	51.0638	14	40	35	0.0564794	0.18539	0.731913
1161	AS2_scf7180000695072	16493	T	C	ASIC002941-RA:c.58A>G	ASIC002941:p.Ile20Val	21	48	43.75	18	40	45	0.169241	0.210713	0.676308
1162	AS2_scf7180000695072	29027	G	A	ASIC002942-RA:c.31G>A	ASIC002942:p.Ala11Thr	38	49	77.551	23	44	52.2727	0.00677046	0.0750029	1.12492
1163	AS2_scf7180000695072	29031	T	C	ASIC002942-RA:c.35T>C	ASIC002942:p.Val12Ala	51	53	96.2264	42	46	91.3043	0.200681	0.228351	0.641396
1164	AS2_scf7180000695072	51912	T	C	ASIC002945-RA:c.2T>C	ASIC002945:p.Met1?	29	54	53.7037	32	48	66.6667	0.0670285	0.194468	0.711151
1165	AS2_scf7180000695072	51914	G	C	ASIC002945-RA:c.4G>C	ASIC002945:p.Val2Leu	29	54	53.7037	32	48	66.6667	0.0670285	0.194434	0.711228
1166	AS2_scf7180000695072	52406	A	G	ASIC002945-RA:c.496A>G	ASIC002945:p.Thr166Ala	47	47	100	43	45	95.5556	0.236503	0.259429	0.585982
1167	AS2_scf7180000695073	7939	T	A	ASIC002949-RA:c.139A>T	ASIC002949:p.Asn47Tyr	36	41	87.8049	24	41	58.5366	0.00223502	0.0435803	1.36071
1168	AS2_scf7180000695074	3169	G	A	ASIC002951-RA:c.2230G>A	ASIC002951:p.Gly744Ser	21	55	38.1818	21	50	42	0.14598	0.222324	0.653013
1169	AS2_scf7180000695074	3314	A	G	ASIC002951-RA:c.2375A>G	ASIC002951:p.Lys792Arg	17	46	36.9565	24	60	40	0.151832	0.220626	0.656343
1170	AS2_scf7180000695074	7906	A	G	ASIC002951-RA:c.3793A>G	ASIC002951:p.Met1265Val	25	46	54.3478	25	43	58.1395	0.158747	0.217066	0.663409
1171	AS2_scf7180000695074	21991	T	C	ASIC002956-RA:c.584A>G	ASIC002956:p.Glu195Gly	37	40	92.5	42	43	97.6744	0.23119	0.254747	0.59389
1172	AS2_scf7180000695074	31007	T	C	ASIC002959-RA:c.494A>G	ASIC002959:p.Glu165Gly	30	47	63.8298	10	40	25	0.000232623	0.0144527	1.84005
1173	AS2_scf7180000695074	31182	G	C	ASIC002959-RA:c.319C>G	ASIC002959:p.Pro107Ala	46	50	92	44	49	89.7959	0.253696	0.274802	0.56098
1174	AS2_scf7180000695074	31474	T	C	ASIC002959-RA:c.94A>G	ASIC002959:p.Thr32Ala	23	49	46.9388	28	50	56	0.106834	0.218236	0.661075
1175	AS2_scf7180000695074	38689	G	A	ASIC002953-RA:c.482G>A	ASIC002953:p.Gly161Glu	37	42	88.0952	32	42	76.1905	0.0845135	0.208383	0.681139
1176	AS2_scf7180000695074	38797	T	A	ASIC002953-RA:c.590T>A	ASIC002953:p.Val197Glu	45	47	95.7447	49	49	100	0.237061	0.259902	0.58519
1177	AS2_scf7180000695079	40917	C	G	ASIC002963-RA:c.140G>C	ASIC002963:p.Gly47Ala	21	45	46.6667	15	41	36.5854	0.111784	0.219485	0.658594
1178	AS2_scf7180000695079	41661	A	G	ASIC002964-RA:c.731T>C	ASIC002964:p.Phe244Ser	19	46	41.3043	22	51	43.1373	0.16032	0.216444	0.664654
1179	AS2_scf7180000695079	118997	T	C	ASIC002969-RA:c.2T>C	ASIC002969:p.Met1?	92	167	55.0898	124	206	60.1942	0.0513601	0.180789	0.742827
1180	AS2_scf7180000695079	119000	T	C	ASIC002969-RA:c.5T>C	ASIC002969:p.Ile2Thr	91	168	54.1667	128	210	60.9524	0.0346748	0.154131	0.812109
1181	AS2_scf7180000695079	119019	A	C	ASIC002969-RA:c.24A>C	ASIC002969:p.Glu8Asp	89	148	60.1351	139	189	73.545	0.00315991	0.0518402	1.28533
1182	AS2_scf7180000695079	132210	A	G	ASIC002970-RA:c.2T>C	ASIC002970:p.Met1?	24	50	48	20	43	46.5116	0.163205	0.214976	0.667611
1183	AS2_scf7180000695082	157638	G	A	ASIC002991-RA:c.314G>A	ASIC002991:p.Gly105Glu	180	224	80.3571	196	250	78.4	0.0789658	0.203453	0.691535
1184	AS2_scf7180000695082	157673	C	G	ASIC002991-RA:c.349C>G	ASIC002991:p.His117Asp	177	223	79.3722	179	250	71.6	0.0126295	0.099935	1.00028
1185	AS2_scf7180000695082	157782	C	T	ASIC002991-RA:c.458C>T	ASIC002991:p.Thr153Ile	90	224	40.1786	127	258	49.2248	0.0101266	0.0901247	1.04516
1186	AS2_scf7180000695082	157808	G	C	ASIC002991-RA:c.484G>C	ASIC002991:p.Ala162Pro	145	231	62.7706	177	271	65.3137	0.062389	0.19184	0.717061
1187	AS2_scf7180000695082	157819	G	T	ASIC002991-RA:c.495G>T	ASIC002991:p.Glu165Asp	111	235	47.234	156	296	52.7027	0.03188	0.14841	0.828536
1188	AS2_scf7180000695082	157886	A	T	ASIC002991-RA:c.562A>T	ASIC002991:p.Ile188Phe	141	230	61.3043	222	300	74	0.000600059	0.0233452	1.6318
1189	AS2_scf7180000695082	157907	G	A	ASIC002991-RA:c.583G>A	ASIC002991:p.Glu195Lys	121	227	53.304	204	305	66.8852	0.000470072	0.0211016	1.67569
1190	AS2_scf7180000695082	158033	C	A	ASIC002991-RA:c.709C>A	ASIC002991:p.Gln237Lys	163	221	73.7557	193	267	72.2846	0.0764211	0.201928	0.694804
1191	AS2_scf7180000695082	186976	C	G	ASIC002978-RA:c.97G>C	ASIC002978:p.Ala33Pro	39	45	86.6667	39	40	97.5	0.0660074	0.193742	0.712777
1192	AS2_scf7180000695082	186978	A	G	ASIC002978-RA:c.95T>C	ASIC002978:p.Met32Thr	25	45	55.5556	33	40	82.5	0.00536935	0.0670246	1.17377
1193	AS2_scf7180000695082	193151	A	G	ASIC002981-RA:c.126A>G	ASIC002981:p.Ile42Met	33	48	68.75	33	42	78.5714	0.110815	0.219321	0.658921
1194	AS2_scf7180000695082	214997	T	C	ASIC002984-RA:c.7589A>G	ASIC002984:p.His2530Arg	29	45	64.4444	28	42	66.6667	0.174327	0.209665	0.678474
1195	AS2_scf7180000695082	217241	C	G	ASIC002984-RA:c.6626G>C	ASIC002984:p.Gly2209Ala	40	42	95.2381	51	56	91.0714	0.23773	0.260444	0.584286
1196	AS2_scf7180000695082	228067	C	G	ASIC002984-RA:c.3217G>C	ASIC002984:p.Ala1073Pro	30	48	62.5	31	43	72.093	0.111656	0.219418	0.658727
1197	AS2_scf7180000695082	228093	T	G	ASIC002984-RA:c.3191A>C	ASIC002984:p.Lys1064Thr	40	51	78.4314	35	47	74.4681	0.169309	0.210717	0.6763
1198	AS2_scf7180000695082	228110	C	A	ASIC002984-RA:c.3174G>T	ASIC002984:p.Glu1058Asp	16	47	34.0426	17	46	36.9565	0.164286	0.213916	0.669756
1199	AS2_scf7180000695082	229935	C	T	ASIC002984-RA:c.1996G>A	ASIC002984:p.Val666Ile	49	49	100	40	42	95.2381	0.210256	0.236643	0.625905
1200	AS2_scf7180000695082	229943	A	G	ASIC002984-RA:c.1988T>C	ASIC002984:p.Val663Ala	29	51	56.8627	26	45	57.7778	0.162996	0.215081	0.667397
1201	AS2_scf7180000695082	229962	A	C	ASIC002984-RA:c.1969T>G	ASIC002984:p.Ser657Ala	25	61	40.9836	29	55	52.7273	0.06706	0.194318	0.711487
1202	AS2_scf7180000695082	229995	T	C	ASIC002984-RA:c.1936A>G	ASIC002984:p.Thr646Ala	42	46	91.3043	48	51	94.1176	0.264539	0.284529	0.545874
1203	AS2_scf7180000695082	229997	C	A	ASIC002984-RA:c.1934G>T	ASIC002984:p.Ser645Ile	46	46	100	49	51	96.0784	0.27384	0.293029	0.53309
1204	AS2_scf7180000695082	230003	A	T	ASIC002984-RA:c.1928T>A	ASIC002984:p.Ile643Asn	47	47	100	55	57	96.4912	0.297984	0.316213	0.50002
1205	AS2_scf7180000695082	232649	A	C	ASIC002984-RA:c.1622T>G	ASIC002984:p.Ile541Ser	39	41	95.122	40	43	93.0233	0.327793	0.344845	0.462376
1206	AS2_scf7180000695082	233322	C	T	ASIC002984-RA:c.1009G>A	ASIC002984:p.Ala337Thr	27	48	56.25	17	47	36.1702	0.0244155	0.133161	0.875624
1207	AS2_scf7180000695082	233325	G	T	ASIC002984-RA:c.1006C>A	ASIC002984:p.Pro336Thr	27	49	55.102	17	47	36.1702	0.0294558	0.144148	0.841193
1208	AS2_scf7180000695082	233343	G	A	ASIC002984-RA:c.988C>T	ASIC002984:p.Pro330Ser	42	50	84	29	44	65.9091	0.0249585	0.134684	0.870685
1209	AS2_scf7180000695084	10907	A	G	ASIC003013-RA:c.323T>C	ASIC003013:p.Val108Ala	30	40	75	38	47	80.8511	0.165325	0.213162	0.671289
1210	AS2_scf7180000695084	36692	C	T	ASIC003017-RA:c.620G>A	ASIC003017:p.Gly207Asp	17	40	42.5	13	44	29.5455	0.0851086	0.208466	0.680965
1211	AS2_scf7180000695084	48532	A	T	ASIC003000-RA:c.1508A>T	ASIC003000:p.Gln503Leu	41	51	80.3922	26	42	61.9048	0.0270528	0.139358	0.855868
1212	AS2_scf7180000695084	76169	G	C	ASIC003007-RA:c.242G>C	ASIC003007:p.Gly81Ala	27	54	50	36	57	63.1579	0.0579592	0.186943	0.728291
1213	AS2_scf7180000695084	81724	A	G	ASIC003009-RA:c.4295T>C	ASIC003009:p.Val1432Ala	39	43	90.6977	43	45	95.5556	0.225445	0.249798	0.60241
1214	AS2_scf7180000695084	117984	G	C	ASIC003011-RA:c.340G>C	ASIC003011:p.Val114Leu	32	42	76.1905	17	41	41.4634	0.00101523	0.0294128	1.53146
1215	AS2_scf7180000695084	118085	A	C	ASIC003011-RA:c.441A>C	ASIC003011:p.Glu147Asp	49	56	87.5	26	40	65	0.00687917	0.0755414	1.12181
1216	AS2_scf7180000695084	118443	T	C	ASIC003011-RA:c.799T>C	ASIC003011:p.Ser267Pro	44	52	84.6154	34	46	73.913	0.0855783	0.208181	0.68156
1217	AS2_scf7180000695084	120448	T	G	ASIC003012-RA:c.1277A>C	ASIC003012:p.Gln426Pro	13	40	32.5	19	41	46.3415	0.0812856	0.205732	0.686698
1218	AS2_scf7180000695085	1785	A	G	ASIC003020-RA:c.415T>C	ASIC003020:p.*139Gln	46	46	100	48	55	87.2727	0.0117984	0.09678	1.01421
1219	AS2_scf7180000695085	1787	C	A	ASIC003020-RA:c.413G>T	ASIC003020:p.Arg138Leu	27	46	58.6957	28	55	50.9091	0.117754	0.221059	0.655492
1220	AS2_scf7180000695085	2372	T	C	ASIC003020-RA:c.28A>G	ASIC003020:p.Arg10Gly	28	57	49.1228	23	48	47.9167	0.154103	0.219533	0.658501
1221	AS2_scf7180000695099	9698	A	C	ASIC003027-RA:c.7A>C	ASIC003027:p.Lys3Gln	19	52	36.5385	25	56	44.6429	0.108389	0.218571	0.660407
1222	AS2_scf7180000695128	5873	G	A	ASIC003034-RA:c.2133G>A	ASIC003034:p.Met711Ile	17	51	33.3333	27	50	54	0.0182401	0.11799	0.928154
1223	AS2_scf7180000695128	8010	G	A	ASIC003034-RA:c.3955G>A	ASIC003034:p.Val1319Ile	14	42	33.3333	33	58	56.8966	0.0109284	0.0929086	1.03194
1224	AS2_scf7180000695168	14845	T	G	ASIC003045-RA:c.211T>G	ASIC003045:p.Cys71Gly	39	40	97.5	42	42	100	0.487805	0.50143	0.29979
1225	AS2_scf7180000695181	13630	T	C	ASIC003053-RA:c.79A>G	ASIC003053:p.Lys27Glu	42	48	87.5	43	45	95.5556	0.119291	0.221402	0.654819
1226	AS2_scf7180000695181	13638	T	C	ASIC003053-RA:c.71A>G	ASIC003053:p.Lys24Arg	43	49	87.7551	50	52	96.1538	0.0917514	0.211754	0.674169
1227	AS2_scf7180000695181	13648	T	C	ASIC003053-RA:c.61A>G	ASIC003053:p.Asn21Asp	57	62	91.9355	57	59	96.6102	0.175354	0.209864	0.678061
1228	AS2_scf7180000695182	27098	A	G	ASIC003057-RA:c.2T>C	ASIC003057:p.Met1?	30	48	62.5	33	43	76.7442	0.0626623	0.191958	0.716795
1229	AS2_scf7180000695182	53272	C	T	ASIC003063-RA:c.227G>A	ASIC003063:p.Ser76Asn	25	44	56.8182	19	43	44.186	0.0859272	0.208471	0.680955
1230	AS2_scf7180000695200	10168	T	C	ASIC003070-RA:c.880A>G	ASIC003070:p.Thr294Ala	50	53	94.3396	47	48	97.9167	0.275403	0.294623	0.530733
1231	AS2_scf7180000695200	13976	G	A	ASIC003071-RA:c.1639G>A	ASIC003071:p.Ala547Thr	21	48	43.75	22	41	53.6585	0.109944	0.218924	0.659707
1232	AS2_scf7180000695236	46744	C	T	ASIC003094-RA:c.89C>T	ASIC003094:p.Pro30Leu	46	49	93.8776	40	42	95.2381	0.341108	0.358392	0.445642
1233	AS2_scf7180000695236	46755	A	G	ASIC003094-RA:c.100A>G	ASIC003094:p.Thr34Ala	42	48	87.5	31	40	77.5	0.105748	0.218255	0.661035
1234	AS2_scf7180000695236	52650	G	A	ASIC003116-RA:c.112C>T	ASIC003116:p.Arg38Cys	22	45	48.8889	27	41	65.8537	0.0501336	0.178939	0.747295
1235	AS2_scf7180000695236	52652	T	G	ASIC003116-RA:c.110A>C	ASIC003116:p.His37Pro	23	45	51.1111	27	40	67.5	0.0552634	0.185004	0.732819
1236	AS2_scf7180000695236	52683	T	C	ASIC003116-RA:c.79A>G	ASIC003116:p.Lys27Glu	49	50	98	38	41	92.6829	0.199426	0.227224	0.643546
1237	AS2_scf7180000695236	62142	A	G	ASIC003127-RA:c.227T>C	ASIC003127:p.Leu76Ser	40	41	97.561	38	42	90.4762	0.158058	0.217598	0.662345
1238	AS2_scf7180000695236	100428	G	C	ASIC003084-RA:c.23G>C	ASIC003084:p.Trp8Ser	18	42	42.8571	25	45	55.5556	0.0854277	0.208466	0.680965
1239	AS2_scf7180000695236	130420	T	A	ASIC003088-RA:c.1148T>A	ASIC003088:p.Leu383Gln	51	53	96.2264	39	40	97.5	0.424765	0.441293	0.355273
1240	AS2_scf7180000695236	211169	A	C	ASIC003090-RA:c.41A>C	ASIC003090:p.Asp14Ala	42	43	97.6744	52	52	100	0.452632	0.468962	0.328862
1241	AS2_scf7180000695236	211282	A	C	ASIC003090-RA:c.154A>C	ASIC003090:p.Thr52Pro	38	47	80.8511	40	43	93.0233	0.0613969	0.1908	0.719422
1242	AS2_scf7180000695236	212129	C	A	ASIC003090-RA:c.794C>A	ASIC003090:p.Thr265Asn	29	48	60.4167	27	48	56.25	0.150661	0.221126	0.65536
1243	AS2_scf7180000695236	212600	A	G	ASIC003090-RA:c.1265A>G	ASIC003090:p.His422Arg	36	48	75	31	43	72.093	0.178855	0.211545	0.674597
1244	AS2_scf7180000695236	215482	T	A	ASIC003091-RA:c.1822A>T	ASIC003091:p.Ser608Cys	28	42	66.6667	47	61	77.0492	0.0908967	0.211153	0.675402
1245	AS2_scf7180000695236	216537	C	T	ASIC003091-RA:c.1156G>A	ASIC003091:p.Ala386Thr	16	47	34.0426	17	44	38.6364	0.155759	0.218784	0.659985
1246	AS2_scf7180000695236	223830	T	A	ASIC003092-RA:c.259A>T	ASIC003092:p.Arg87*	40	46	86.9565	39	42	92.8571	0.188205	0.218337	0.660873
1247	AS2_scf7180000695236	239626	A	C	ASIC003095-RA:c.127A>C	ASIC003095:p.Thr43Pro	23	43	53.4884	28	42	66.6667	0.0825398	0.207046	0.683932
1248	AS2_scf7180000695236	239652	G	C	ASIC003095-RA:c.153G>C	ASIC003095:p.Trp51Cys	17	47	36.1702	29	55	52.7273	0.0397169	0.162406	0.789398
1249	AS2_scf7180000695236	285460	A	G	ASIC003096-RA:c.97A>G	ASIC003096:p.Thr33Ala	29	47	61.7021	10	42	23.8095	0.000252637	0.0152892	1.81561
1250	AS2_scf7180000695236	306484	A	C	ASIC003100-RA:c.662A>C	ASIC003100:p.Gln221Pro	39	40	97.5	43	49	87.7551	0.0811801	0.20588	0.686387
1251	AS2_scf7180000695236	319010	A	C	ASIC003100-RA:c.3520A>C	ASIC003100:p.Thr1174Pro	36	44	81.8182	33	45	73.3333	0.12855	0.222487	0.652695
1252	AS2_scf7180000695236	319395	C	A	ASIC003100-RA:c.3905C>A	ASIC003100:p.Thr1302Lys	34	63	53.9683	17	51	33.3333	0.0135639	0.103423	0.985385
1253	AS2_scf7180000695236	319407	T	C	ASIC003100-RA:c.3917T>C	ASIC003100:p.Leu1306Ser	63	63	100	48	50	96	0.193584	0.222601	0.652472
1254	AS2_scf7180000695236	319425	A	T	ASIC003100-RA:c.3935A>T	ASIC003100:p.Lys1312Ile	32	55	58.1818	27	57	47.3684	0.0786329	0.20343	0.691586
1255	AS2_scf7180000695236	319516	A	T	ASIC003100-RA:c.4026A>T	ASIC003100:p.Gln1342His	16	51	31.3725	24	49	48.9796	0.0329885	0.150442	0.822632
1256	AS2_scf7180000695236	319529	G	C	ASIC003100-RA:c.4039G>C	ASIC003100:p.Glu1347Gln	21	50	42	22	49	44.898	0.154014	0.21954	0.658487
1257	AS2_scf7180000695236	320137	C	A	ASIC003100-RA:c.4647C>A	ASIC003100:p.Asp1549Glu	21	40	52.5	36	49	73.4694	0.0222699	0.128583	0.890816
1258	AS2_scf7180000695236	348591	T	A	ASIC003104-RA:c.171T>A	ASIC003104:p.His57Gln	31	50	62	35	42	83.3333	0.0144778	0.10685	0.971224
1259	AS2_scf7180000695236	348736	C	G	ASIC003104-RA:c.316C>G	ASIC003104:p.Pro106Ala	24	41	58.5366	33	49	67.3469	0.120212	0.221326	0.654968
1260	AS2_scf7180000695236	393938	C	G	ASIC003113-RA:c.2259G>C	ASIC003113:p.Arg753Ser	41	44	93.1818	45	47	95.7447	0.307858	0.325824	0.487017
1261	AS2_scf7180000695236	393954	A	G	ASIC003113-RA:c.2243T>C	ASIC003113:p.Leu748Pro	49	54	90.7407	44	44	100	0.0465685	0.173491	0.760724
1262	AS2_scf7180000695236	395302	A	C	ASIC003113-RA:c.967T>G	ASIC003113:p.Ser323Ala	38	51	74.5098	27	45	60	0.0558874	0.185196	0.732369
1263	AS2_scf7180000695236	395627	G	T	ASIC003113-RA:c.642C>A	ASIC003113:p.Asp214Glu	14	49	28.5714	18	41	43.9024	0.0568152	0.185561	0.731514
1264	AS2_scf7180000695236	396195	G	C	ASIC003113-RA:c.313C>G	ASIC003113:p.Leu105Val	34	41	82.9268	29	44	65.9091	0.0408879	0.164437	0.783999
1265	AS2_scf7180000695236	397173	C	T	ASIC003114-RA:c.1300G>A	ASIC003114:p.Gly434Ser	19	49	38.7755	22	47	46.8085	0.119769	0.221333	0.654954
1266	AS2_scf7180000695236	398600	A	C	ASIC003114-RA:c.523T>G	ASIC003114:p.Ser175Ala	45	46	97.8261	58	58	100	0.442308	0.458877	0.338304
1267	AS2_scf7180000695236	398609	T	C	ASIC003114-RA:c.514A>G	ASIC003114:p.Thr172Ala	23	42	54.7619	26	60	43.3333	0.084447	0.208281	0.68135
1268	AS2_scf7180000695236	417374	T	C	ASIC003121-RA:c.269T>C	ASIC003121:p.Val90Ala	29	45	64.4444	33	47	70.2128	0.148258	0.221682	0.65427
1269	AS2_scf7180000695236	441457	T	C	ASIC003124-RA:c.272A>G	ASIC003124:p.Gln91Arg	34	41	82.9268	39	46	84.7826	0.222482	0.247421	0.606564
1270	AS2_scf7180000695236	514239	G	T	ASIC003126-RA:c.44G>T	ASIC003126:p.Arg15Leu	41	49	83.6735	44	44	100	0.00442824	0.0614761	1.21129
1271	AS2_scf7180000695236	514251	T	A	ASIC003126-RA:c.56T>A	ASIC003126:p.Val19Asp	37	43	86.0465	46	46	100	0.0104911	0.0913777	1.03916
1272	AS2_scf7180000695236	519684	C	T	ASIC003128-RA:c.1517G>A	ASIC003128:p.Ser506Asn	36	43	83.7209	37	40	92.5	0.130893	0.222512	0.652647
1273	AS2_scf7180000695236	519732	G	A	ASIC003128-RA:c.1469C>T	ASIC003128:p.Ala490Val	35	49	71.4286	38	44	86.3636	0.0448132	0.170806	0.767496
1274	AS2_scf7180000695236	523146	T	A	ASIC003129-RA:c.425A>T	ASIC003129:p.Tyr142Phe	46	51	90.1961	46	52	88.4615	0.239772	0.262311	0.581184
1275	AS2_scf7180000695236	524603	C	A	ASIC003130-RA:c.1167G>T	ASIC003130:p.Gln389His	33	44	75	39	42	92.8571	0.0194	0.121037	0.917081
1276	AS2_scf7180000695236	533761	C	T	ASIC003131-RA:c.1030G>A	ASIC003131:p.Ala344Thr	39	48	81.25	47	50	94	0.0404657	0.163706	0.785935
1277	AS2_scf7180000695236	533986	T	C	ASIC003131-RA:c.805A>G	ASIC003131:p.Thr269Ala	40	41	97.561	58	59	98.3051	0.488687	0.501768	0.299497
1278	AS2_scf7180000695236	542735	T	C	ASIC003134-RA:c.1556A>G	ASIC003134:p.Asn519Ser	39	45	86.6667	47	48	97.9167	0.0412686	0.164752	0.78317
1279	AS2_scf7180000695236	546037	G	A	ASIC003135-RA:c.2038C>T	ASIC003135:p.Leu680Phe	39	45	86.6667	35	40	87.5	0.251205	0.272719	0.564285
1280	AS2_scf7180000695236	546334	C	T	ASIC003135-RA:c.1741G>A	ASIC003135:p.Val581Met	34	48	70.8333	42	43	97.6744	0.000378227	0.0189577	1.72221
1281	AS2_scf7180000695236	549396	C	A	ASIC003135-RA:c.486G>T	ASIC003135:p.Gln162His	25	63	39.6825	33	68	48.5294	0.0837792	0.207921	0.682102
1282	AS2_scf7180000695236	549422	A	T	ASIC003135-RA:c.460T>A	ASIC003135:p.Trp154Arg	25	69	36.2319	40	76	52.6316	0.0189095	0.1199	0.921181
1283	AS2_scf7180000695236	549620	T	C	ASIC003135-RA:c.262A>G	ASIC003135:p.Ile88Val	55	90	61.1111	34	64	53.125	0.080856	0.205345	0.687517
1284	AS2_scf7180000695236	549851	G	A	ASIC003135-RA:c.31C>T	ASIC003135:p.Leu11Phe	32	64	50	25	55	45.4545	0.129383	0.222281	0.653098
1285	AS2_scf7180000695236	560177	A	C	ASIC003136-RA:c.1092T>G	ASIC003136:p.His364Gln	31	71	43.662	47	81	58.0247	0.0274931	0.140168	0.853352
1286	AS2_scf7180000695236	560406	G	A	ASIC003136-RA:c.863C>T	ASIC003136:p.Thr288Met	52	57	91.2281	54	56	96.4286	0.166963	0.211962	0.673741
1287	AS2_scf7180000695236	562581	G	T	ASIC003137-RA:c.1201C>A	ASIC003137:p.Pro401Thr	35	43	81.3953	37	41	90.2439	0.129964	0.222065	0.653519
1288	AS2_scf7180000695236	562758	G	A	ASIC003137-RA:c.1088C>T	ASIC003137:p.Ser363Phe	36	46	78.2609	33	40	82.5	0.19093	0.220418	0.656753
1289	AS2_scf7180000695236	567150	T	C	ASIC003140-RA:c.982A>G	ASIC003140:p.Ile328Val	39	40	97.5	46	47	97.8723	0.502539	0.512226	0.290538
1290	AS2_scf7180000695236	567155	C	T	ASIC003140-RA:c.977G>A	ASIC003140:p.Gly326Asp	40	43	93.0233	47	49	95.9184	0.295117	0.313416	0.503879
1291	AS2_scf7180000695236	567220	G	T	ASIC003140-RA:c.912C>A	ASIC003140:p.Phe304Leu	36	42	85.7143	48	50	96	0.0690377	0.196392	0.706876
1292	AS2_scf7180000695266	12490	C	T	ASIC003159-RA:c.82C>T	ASIC003159:p.Pro28Ser	18	44	40.9091	14	42	33.3333	0.136445	0.223465	0.650791
1293	AS2_scf7180000695266	22593	G	A	ASIC003160-RA:c.199G>A	ASIC003160:p.Glu67Lys	23	55	41.8182	22	40	55	0.0745314	0.2006	0.697669
1294	AS2_scf7180000695274	43352	A	T	ASIC003173-RA:c.1057A>T	ASIC003173:p.Thr353Ser	25	46	54.3478	19	52	36.5385	0.0345141	0.15371	0.813299
1295	AS2_scf7180000695287	7818	T	C	ASIC003179-RA:c.184A>G	ASIC003179:p.Arg62Gly	38	41	92.6829	34	41	82.9268	0.112027	0.219303	0.658955
1296	AS2_scf7180000695287	18083	G	C	ASIC003185-RA:c.490G>C	ASIC003185:p.Val164Leu	43	44	97.7273	38	40	95	0.360186	0.377805	0.422732
1297	AS2_scf7180000695287	41520	G	C	ASIC003188-RA:c.244C>G	ASIC003188:p.Arg82Gly	18	49	36.7347	15	44	34.0909	0.165926	0.212863	0.6719
1298	AS2_scf7180000695287	92133	G	C	ASIC003182-RA:c.248G>C	ASIC003182:p.Gly83Ala	16	45	35.5556	21	44	47.7273	0.0875198	0.209381	0.679062
1299	AS2_scf7180000695292	31093	T	C	ASIC003210-RA:c.557T>C	ASIC003210:p.Val186Ala	46	46	100	41	42	97.619	0.477273	0.491996	0.308038
1300	AS2_scf7180000695292	37697	G	C	ASIC003211-RA:c.1563C>G	ASIC003211:p.Asp521Glu	35	41	85.3659	41	45	91.1111	0.189201	0.218978	0.659599
1301	AS2_scf7180000695292	42015	G	T	ASIC003212-RA:c.231G>T	ASIC003212:p.Glu77Asp	39	44	88.6364	44	45	97.7778	0.0840987	0.208303	0.681305
1302	AS2_scf7180000695292	48845	T	C	ASIC003214-RA:c.1985A>G	ASIC003214:p.His662Arg	39	42	92.8571	42	45	93.3333	0.322589	0.340005	0.468515
1303	AS2_scf7180000695292	91729	C	A	ASIC003199-RA:c.256G>T	ASIC003199:p.Val86Leu	21	46	45.6522	20	42	47.619	0.166403	0.212423	0.672798
1304	AS2_scf7180000695292	91743	C	A	ASIC003199-RA:c.242G>T	ASIC003199:p.Arg81Leu	20	42	47.619	15	46	32.6087	0.0626165	0.191997	0.716705
1305	AS2_scf7180000695292	97673	T	A	ASIC003200-RA:c.481A>T	ASIC003200:p.Arg161*	23	40	57.5	29	44	65.9091	0.130641	0.222339	0.652985
1306	AS2_scf7180000695292	98195	A	G	ASIC003200-RA:c.53T>C	ASIC003200:p.Phe18Ser	43	46	93.4783	50	53	94.3396	0.317356	0.335247	0.474635
1307	AS2_scf7180000695292	100213	T	C	ASIC003201-RA:c.2750A>G	ASIC003201:p.Gln917Arg	39	40	97.5	42	44	95.4545	0.397129	0.41337	0.383661
1308	AS2_scf7180000695293	17780	G	A	ASIC003218-RA:c.482C>T	ASIC003218:p.Thr161Ile	20	41	48.7805	19	40	47.5	0.17467	0.209753	0.678293
1309	AS2_scf7180000695296	31472	A	T	ASIC003224-RA:c.639A>T	ASIC003224:p.Glu213Asp	27	44	61.3636	42	51	82.3529	0.0139501	0.104899	0.979229
1310	AS2_scf7180000695300	4676	T	A	ASIC003227-RA:c.506T>A	ASIC003227:p.Leu169Gln	17	46	36.9565	22	49	44.898	0.122088	0.221387	0.654849
1311	AS2_scf7180000695300	4852	T	A	ASIC003227-RA:c.682T>A	ASIC003227:p.Leu228Met	63	97	64.9485	79	108	73.1481	0.0541005	0.18409	0.734969
1312	AS2_scf7180000695300	4865	C	T	ASIC003227-RA:c.695C>T	ASIC003227:p.Ala232Val	56	86	65.1163	84	112	75	0.040085	0.163054	0.787667
1313	AS2_scf7180000695300	4949	T	C	ASIC003227-RA:c.779T>C	ASIC003227:p.Leu260Pro	76	120	63.3333	113	141	80.1418	0.00116223	0.0313897	1.50321
1314	AS2_scf7180000695300	5008	A	G	ASIC003227-RA:c.838A>G	ASIC003227:p.Thr280Ala	100	141	70.922	111	140	79.2857	0.0297988	0.14457	0.839921
1315	AS2_scf7180000695325	4465	A	C	ASIC003233-RA:c.1445A>C	ASIC003233:p.Asn482Thr	21	41	51.2195	13	42	30.9524	0.0312597	0.1472	0.832093
1316	AS2_scf7180000695325	4780	T	C	ASIC003233-RA:c.1760T>C	ASIC003233:p.Val587Ala	42	44	95.4545	45	45	100	0.241573	0.263945	0.578486
1317	AS2_scf7180000695325	6570	A	G	ASIC003233-RA:c.3550A>G	ASIC003233:p.Thr1184Ala	23	48	47.9167	14	40	35	0.0826923	0.207079	0.683863
1318	AS2_scf7180000695325	14122	T	C	ASIC003235-RA:c.658A>G	ASIC003235:p.Thr220Ala	41	42	97.619	40	44	90.9091	0.163714	0.214435	0.668704
1319	AS2_scf7180000695325	17336	G	T	ASIC003237-RA:c.1735C>A	ASIC003237:p.His579Asn	14	44	31.8182	20	45	44.4444	0.0827417	0.207076	0.68387
1320	AS2_scf7180000695325	24743	C	A	ASIC003239-RA:c.71G>T	ASIC003239:p.Trp24Leu	32	42	76.1905	28	54	51.8519	0.00862265	0.0830254	1.08079
1321	AS2_scf7180000695325	26495	G	T	ASIC003240-RA:c.260G>T	ASIC003240:p.Ser87Ile	35	51	68.6275	20	41	48.7805	0.0271273	0.139477	0.855496
1322	AS2_scf7180000695331	26689	A	G	ASIC003246-RA:c.4336A>G	ASIC003246:p.Thr1446Ala	51	51	100	39	40	97.5	0.43956	0.456316	0.340734
1323	AS2_scf7180000695331	34326	G	A	ASIC003247-RA:c.1126C>T	ASIC003247:p.Gln376*	38	40	95	28	40	70	0.00288946	0.0495943	1.30457
1324	AS2_scf7180000695334	14715	T	A	ASIC003250-RA:c.25A>T	ASIC003250:p.Thr9Ser	30	42	71.4286	27	42	64.2857	0.145285	0.222551	0.652571
1325	AS2_scf7180000695349	14194	A	G	ASIC003262-RA:c.89A>G	ASIC003262:p.Tyr30Cys	32	60	53.3333	17	50	34	0.0198552	0.12229	0.91261
1326	AS2_scf7180000695349	14203	T	G	ASIC003262-RA:c.98T>G	ASIC003262:p.Leu33Arg	37	58	63.7931	24	50	48	0.0402638	0.163334	0.786923
1327	AS2_scf7180000695349	14212	G	T	ASIC003262-RA:c.107G>T	ASIC003262:p.Gly36Val	39	59	66.1017	31	54	57.4074	0.0984306	0.214362	0.668853
1328	AS2_scf7180000695349	14251	T	C	ASIC003262-RA:c.146T>C	ASIC003262:p.Val49Ala	19	51	37.2549	36	51	70.5882	0.00052773	0.0219977	1.65762
1329	AS2_scf7180000695349	33219	A	G	ASIC003264-RA:c.212A>G	ASIC003264:p.Asp71Gly	44	47	93.617	35	44	79.5455	0.0364349	0.156177	0.806383
1330	AS2_scf7180000695349	33230	T	C	ASIC003264-RA:c.223T>C	ASIC003264:p.Phe75Leu	18	47	38.2979	17	46	36.9565	0.167844	0.211309	0.675083
1331	AS2_scf7180000695349	43283	G	C	ASIC003267-RA:c.3G>C	ASIC003267:p.Met1?	12	43	27.907	19	40	47.5	0.0338501	0.152204	0.817573
1332	AS2_scf7180000695349	50112	T	G	ASIC003268-RA:c.1789A>C	ASIC003268:p.Ser597Arg	37	57	64.9123	26	47	55.3191	0.0978266	0.21373	0.670135
1333	AS2_scf7180000695349	51487	C	T	ASIC003268-RA:c.682G>A	ASIC003268:p.Ala228Thr	17	46	36.9565	21	46	45.6522	0.117928	0.22103	0.655549
1334	AS2_scf7180000695349	52764	A	T	ASIC003268-RA:c.482T>A	ASIC003268:p.Phe161Tyr	29	43	67.4419	23	40	57.5	0.116909	0.220562	0.656469
1335	AS2_scf7180000695349	53243	A	T	ASIC003268-RA:c.76T>A	ASIC003268:p.Leu26Met	17	42	40.4762	25	52	48.0769	0.126746	0.22262	0.652436
1336	AS2_scf7180000695349	53252	T	C	ASIC003268-RA:c.67A>G	ASIC003268:p.Thr23Ala	20	43	46.5116	25	59	42.3729	0.14668	0.222148	0.653358
1337	AS2_scf7180000695349	53258	T	C	ASIC003268-RA:c.61A>G	ASIC003268:p.Ser21Gly	19	47	40.4255	34	60	56.6667	0.0392095	0.161911	0.790723
1338	AS2_scf7180000695349	53311	T	C	ASIC003268-RA:c.8A>G	ASIC003268:p.His3Arg	16	41	39.0244	15	47	31.9149	0.139194	0.223598	0.650532
1339	AS2_scf7180000695349	55426	A	C	ASIC003256-RA:c.134A>C	ASIC003256:p.Gln45Pro	44	48	91.6667	42	43	97.6744	0.179917	0.212278	0.673094
1340	AS2_scf7180000695349	58407	G	T	ASIC003258-RA:c.35G>T	ASIC003258:p.Gly12Val	13	43	30.2326	21	43	48.8372	0.0378228	0.158875	0.798943
1341	AS2_scf7180000695349	62108	T	G	ASIC003260-RA:c.972T>G	ASIC003260:p.Asp324Glu	28	41	68.2927	21	44	47.7273	0.0284843	0.142291	0.846823
1342	AS2_scf7180000695360	3830	T	A	ASIC003273-RA:c.46T>A	ASIC003273:p.Ser16Thr	16	48	33.3333	21	44	47.7273	0.0637575	0.193033	0.714369
1343	AS2_scf7180000695360	5367	G	A	ASIC003273-RA:c.1494G>A	ASIC003273:p.Met498Ile	21	43	48.8372	20	43	46.5116	0.166918	0.212038	0.673587
1344	AS2_scf7180000695360	5732	C	T	ASIC003273-RA:c.1859C>T	ASIC003273:p.Ser620Leu	37	45	82.2222	38	51	74.5098	0.131215	0.222482	0.652706
1345	AS2_scf7180000695360	5917	G	A	ASIC003273-RA:c.2044G>A	ASIC003273:p.Ala682Thr	19	40	47.5	37	59	62.7119	0.0541675	0.184165	0.734793
1346	AS2_scf7180000695360	6708	A	T	ASIC003273-RA:c.2835A>T	ASIC003273:p.Glu945Asp	52	53	98.1132	45	48	93.75	0.224517	0.249057	0.603701
1347	AS2_scf7180000695360	11253	C	A	ASIC003275-RA:c.749C>A	ASIC003275:p.Thr250Lys	46	46	100	38	41	92.6829	0.100571	0.21549	0.666573
1348	AS2_scf7180000695373	28838	G	C	ASIC003287-RA:c.2162G>C	ASIC003287:p.Gly721Ala	16	41	39.0244	22	48	45.8333	0.138726	0.223527	0.65067
1349	AS2_scf7180000695384	32688	A	G	ASIC003297-RA:c.235T>C	ASIC003297:p.*79Gln	10	40	25	22	49	44.898	0.0272144	0.139531	0.855331
1350	AS2_scf7180000695384	32753	A	G	ASIC003297-RA:c.170T>C	ASIC003297:p.Val57Ala	34	40	85	35	48	72.9167	0.0831079	0.207516	0.682949
1351	AS2_scf7180000695440	16935	A	T	ASIC003318-RA:c.392T>A	ASIC003318:p.Ile131Asn	33	40	82.5	33	40	82.5	0.230469	0.254158	0.594896
1352	AS2_scf7180000695440	19986	G	C	ASIC003320-RA:c.629C>G	ASIC003320:p.Thr210Ser	41	47	87.234	43	45	95.5556	0.114204	0.219695	0.658179
1353	AS2_scf7180000695450	25275	T	G	ASIC003325-RA:c.1432T>G	ASIC003325:p.Ser478Ala	40	48	83.3333	36	40	90	0.167919	0.211273	0.675156
1354	AS2_scf7180000695450	25506	T	A	ASIC003325-RA:c.1663T>A	ASIC003325:p.Ser555Thr	26	46	56.5217	34	52	65.3846	0.110483	0.219249	0.659063
1355	AS2_scf7180000695450	37478	G	C	ASIC003328-RA:c.657G>C	ASIC003328:p.Glu219Asp	30	53	56.6038	8	40	20	0.000275217	0.0160609	1.79423
1356	AS2_scf7180000695450	37674	T	A	ASIC003328-RA:c.853T>A	ASIC003328:p.Ser285Thr	17	46	36.9565	19	41	46.3415	0.11719	0.220481	0.656628
1357	AS2_scf7180000695450	37954	T	C	ASIC003328-RA:c.1133T>C	ASIC003328:p.Ile378Thr	47	48	97.9167	50	51	98.0392	0.504638	0.513468	0.289486
1358	AS2_scf7180000695450	38208	G	C	ASIC003328-RA:c.1287G>C	ASIC003328:p.Glu429Asp	30	44	68.1818	33	44	75	0.146173	0.222349	0.652965
1359	AS2_scf7180000695450	38231	A	C	ASIC003328-RA:c.1310A>C	ASIC003328:p.Glu437Ala	32	44	72.7273	36	48	75	0.181772	0.213296	0.671017
1360	AS2_scf7180000695450	38374	T	A	ASIC003328-RA:c.1453T>A	ASIC003328:p.Cys485Ser	38	51	74.5098	30	46	65.2174	0.107644	0.218388	0.660771
1361	AS2_scf7180000695450	38615	C	A	ASIC003328-RA:c.1621C>A	ASIC003328:p.Gln541Lys	26	42	61.9048	37	41	90.2439	0.00206147	0.0421582	1.37512
1362	AS2_scf7180000695471	31152	C	T	ASIC003354-RA:c.62C>T	ASIC003354:p.Ser21Phe	25	46	54.3478	14	40	35	0.0350872	0.154161	0.812025
1363	AS2_scf7180000695471	46923	G	T	ASIC003335-RA:c.296G>T	ASIC003335:p.Gly99Val	34	62	54.8387	36	61	59.0164	0.129658	0.222193	0.653269
1364	AS2_scf7180000695471	66951	C	T	ASIC003338-RA:c.373G>A	ASIC003338:p.Val125Ile	32	42	76.1905	30	40	75	0.200891	0.228558	0.641003
1365	AS2_scf7180000695471	87650	T	C	ASIC003342-RA:c.293A>G	ASIC003342:p.Gln98Arg	41	42	97.619	41	41	100	0.506024	0.512835	0.290023
1366	AS2_scf7180000695471	89500	A	T	ASIC003343-RA:c.84A>T	ASIC003343:p.Glu28Asp	43	43	100	39	40	97.5	0.481928	0.496482	0.304097
1367	AS2_scf7180000695471	91328	C	G	ASIC003344-RA:c.921G>C	ASIC003344:p.Leu307Phe	25	44	56.8182	27	48	56.25	0.16633	0.212446	0.672751
1368	AS2_scf7180000695471	91781	A	T	ASIC003344-RA:c.505T>A	ASIC003344:p.Ser169Thr	28	45	62.2222	22	40	55	0.139523	0.223641	0.650448
1369	AS2_scf7180000695471	110242	C	A	ASIC003348-RA:c.122G>T	ASIC003348:p.Ser41Ile	21	46	45.6522	18	54	33.3333	0.0746635	0.200724	0.697401
1370	AS2_scf7180000695471	110253	G	C	ASIC003348-RA:c.111C>G	ASIC003348:p.Ser37Arg	21	44	47.7273	35	55	63.6364	0.0467839	0.173936	0.759611
1371	AS2_scf7180000695471	114911	A	G	ASIC003351-RA:c.32A>G	ASIC003351:p.Glu11Gly	43	45	95.5556	46	52	88.4615	0.139461	0.223652	0.650427
1372	AS2_scf7180000695471	115196	C	A	ASIC003351-RA:c.317C>A	ASIC003351:p.Thr106Asn	50	51	98.0392	37	43	86.0465	0.0303755	0.145382	0.837489
1373	AS2_scf7180000695471	115261	A	G	ASIC003351-RA:c.382A>G	ASIC003351:p.Asn128Asp	41	44	93.1818	24	42	57.1429	8.14748e-05	0.00944184	2.02494
1374	AS2_scf7180000695472	13122	C	A	ASIC003360-RA:c.113G>T	ASIC003360:p.Arg38Leu	18	42	42.8571	22	43	51.1628	0.12892	0.22261	0.652455
1375	AS2_scf7180000695472	30543	G	A	ASIC003361-RA:c.44G>A	ASIC003361:p.Arg15His	28	50	56	25	40	62.5	0.141381	0.223335	0.651044
1376	AS2_scf7180000695472	30545	G	A	ASIC003361-RA:c.46G>A	ASIC003361:p.Ala16Thr	28	49	57.1429	25	40	62.5	0.151316	0.220661	0.656274
1377	AS2_scf7180000695472	53299	A	G	ASIC003364-RA:c.269T>C	ASIC003364:p.Val90Ala	37	57	64.9123	30	46	65.2174	0.164397	0.213907	0.669775
1378	AS2_scf7180000695472	53321	A	G	ASIC003364-RA:c.247T>C	ASIC003364:p.Ser83Pro	51	58	87.931	41	46	89.1304	0.23843	0.261088	0.583213
1379	AS2_scf7180000695473	26672	T	A	ASIC003399-RA:c.141T>A	ASIC003399:p.Asp47Glu	25	48	52.0833	32	53	60.3774	0.112511	0.219488	0.658589
1380	AS2_scf7180000695473	26782	A	C	ASIC003399-RA:c.251A>C	ASIC003399:p.Lys84Thr	34	44	77.2727	43	60	71.6667	0.14748	0.221818	0.654003
1381	AS2_scf7180000695473	26919	A	G	ASIC003399-RA:c.388A>G	ASIC003399:p.Ile130Val	50	52	96.1538	64	68	94.1176	0.295634	0.313903	0.503204
1382	AS2_scf7180000695473	27089	A	C	ASIC003399-RA:c.500A>C	ASIC003399:p.Lys167Thr	37	55	67.2727	30	49	61.2245	0.132386	0.222941	0.651811
1383	AS2_scf7180000695473	27509	A	G	ASIC003399-RA:c.920A>G	ASIC003399:p.Tyr307Cys	20	44	45.4545	23	45	51.1111	0.145997	0.222287	0.653086
1384	AS2_scf7180000695473	30211	C	T	ASIC003410-RA:c.77C>T	ASIC003410:p.Thr26Ile	62	64	96.875	62	67	92.5373	0.174459	0.2097	0.678401
1385	AS2_scf7180000695473	30271	A	G	ASIC003410-RA:c.137A>G	ASIC003410:p.Glu46Gly	29	80	36.25	24	70	34.2857	0.131779	0.22256	0.652552
1386	AS2_scf7180000695473	30630	A	T	ASIC003410-RA:c.398A>T	ASIC003410:p.Asp133Val	25	64	39.0625	23	67	34.3284	0.123052	0.221684	0.654265
1387	AS2_scf7180000695473	30632	C	T	ASIC003410-RA:c.400C>T	ASIC003410:p.Pro134Ser	25	64	39.0625	23	69	33.3333	0.113436	0.219927	0.657722
1388	AS2_scf7180000695473	30826	A	T	ASIC003410-RA:c.594A>T	ASIC003410:p.Gln198His	69	69	100	69	70	98.5714	0.503597	0.512856	0.290004
1389	AS2_scf7180000695473	30831	G	A	ASIC003410-RA:c.599G>A	ASIC003410:p.Gly200Asp	67	67	100	69	70	98.5714	0.510949	0.517056	0.286462
1390	AS2_scf7180000695473	30839	G	A	ASIC003410-RA:c.607G>A	ASIC003410:p.Glu203Lys	70	71	98.5915	76	76	100	0.482993	0.497203	0.303466
1391	AS2_scf7180000695473	31133	C	A	ASIC003410-RA:c.901C>A	ASIC003410:p.Gln301Lys	70	71	98.5915	82	87	94.2529	0.133653	0.222982	0.65173
1392	AS2_scf7180000695473	31199	C	G	ASIC003410-RA:c.967C>G	ASIC003410:p.Arg323Gly	80	83	96.3855	81	83	97.5904	0.316323	0.33422	0.475967
1393	AS2_scf7180000695473	44659	A	G	ASIC003419-RA:c.3403A>G	ASIC003419:p.Ile1135Val	40	40	100	39	44	88.6364	0.0351777	0.154268	0.811723
1394	AS2_scf7180000695473	50481	C	T	ASIC003420-RA:c.3715G>A	ASIC003420:p.Val1239Ile	36	48	75	32	43	74.4186	0.190034	0.219616	0.658336
1395	AS2_scf7180000695473	50525	T	C	ASIC003420-RA:c.3671A>G	ASIC003420:p.Asn1224Ser	46	51	90.1961	36	43	83.7209	0.158512	0.217326	0.662888
1396	AS2_scf7180000695473	50537	C	T	ASIC003420-RA:c.3659G>A	ASIC003420:p.Arg1220Lys	44	55	80	40	49	81.6327	0.192458	0.221712	0.654211
1397	AS2_scf7180000695473	50556	C	T	ASIC003420-RA:c.3640G>A	ASIC003420:p.Asp1214Asn	28	56	50	22	51	43.1373	0.119969	0.221378	0.654866
1398	AS2_scf7180000695473	50564	T	G	ASIC003420-RA:c.3632A>C	ASIC003420:p.Asn1211Thr	42	48	87.5	44	49	89.7959	0.235254	0.258319	0.587843
1399	AS2_scf7180000695473	50580	G	C	ASIC003420-RA:c.3616C>G	ASIC003420:p.Leu1206Val	28	56	50	17	47	36.1702	0.0595315	0.188626	0.724398
1400	AS2_scf7180000695473	50622	T	C	ASIC003420-RA:c.3574A>G	ASIC003420:p.Thr1192Ala	40	42	95.2381	40	47	85.1064	0.0851908	0.208417	0.681067
1401	AS2_scf7180000695473	51467	G	C	ASIC003420-RA:c.2729C>G	ASIC003420:p.Thr910Arg	32	53	60.3774	21	49	42.8571	0.033584	0.151844	0.818603
1402	AS2_scf7180000695473	51515	G	A	ASIC003420-RA:c.2681C>T	ASIC003420:p.Thr894Met	36	64	56.25	28	67	41.791	0.0358398	0.155461	0.808378
1403	AS2_scf7180000695473	51526	T	C	ASIC003420-RA:c.2670A>G	ASIC003420:p.Ile890Met	40	67	59.7015	25	65	38.4615	0.00719617	0.0772572	1.11206
1404	AS2_scf7180000695473	51592	G	T	ASIC003420-RA:c.2604C>A	ASIC003420:p.Asn868Lys	34	41	82.9268	47	52	90.3846	0.14026	0.223792	0.650155
1405	AS2_scf7180000695473	51597	C	T	ASIC003420-RA:c.2599G>A	ASIC003420:p.Val867Ile	17	42	40.4762	24	53	45.283	0.148351	0.221638	0.654355
1406	AS2_scf7180000695473	51620	C	G	ASIC003420-RA:c.2576G>C	ASIC003420:p.Ser859Thr	34	43	79.0698	51	53	96.2264	0.00881163	0.0841016	1.0752
1407	AS2_scf7180000695473	51628	A	T	ASIC003420-RA:c.2568T>A	ASIC003420:p.Asp856Glu	36	46	78.2609	50	53	94.3396	0.0154365	0.110145	0.958036
1408	AS2_scf7180000695473	51653	A	G	ASIC003420-RA:c.2543T>C	ASIC003420:p.Val848Ala	17	43	39.5349	18	41	43.9024	0.161438	0.215867	0.665813
1409	AS2_scf7180000695473	51891	C	T	ASIC003420-RA:c.2405G>A	ASIC003420:p.Arg802Lys	43	50	86	41	44	93.1818	0.146315	0.222274	0.653111
1410	AS2_scf7180000695473	51950	C	G	ASIC003420-RA:c.2346G>C	ASIC003420:p.Gln782His	20	56	35.7143	26	63	41.2698	0.123813	0.222075	0.6535
1411	AS2_scf7180000695473	51986	T	C	ASIC003420-RA:c.2310A>G	ASIC003420:p.Ile770Met	43	62	69.3548	52	66	78.7879	0.0771077	0.20227	0.694069
1412	AS2_scf7180000695473	52192	A	G	ASIC003420-RA:c.2195T>C	ASIC003420:p.Ile732Thr	23	47	48.9362	37	61	60.6557	0.0747334	0.20078	0.69728
1413	AS2_scf7180000695473	52352	C	G	ASIC003420-RA:c.2035G>C	ASIC003420:p.Glu679Gln	29	55	52.7273	42	69	60.8696	0.096137	0.213696	0.670204
1414	AS2_scf7180000695473	52517	G	C	ASIC003420-RA:c.1870C>G	ASIC003420:p.Leu624Val	30	50	60	38	71	53.5211	0.115598	0.220097	0.657386
1415	AS2_scf7180000695473	52700	G	T	ASIC003420-RA:c.1806C>A	ASIC003420:p.Ser602Arg	36	50	72	33	53	62.2642	0.0968176	0.213611	0.670377
1416	AS2_scf7180000695473	52702	T	C	ASIC003420-RA:c.1804A>G	ASIC003420:p.Ser602Gly	35	51	68.6275	33	53	62.2642	0.130048	0.222047	0.653556
1417	AS2_scf7180000695473	52828	G	C	ASIC003420-RA:c.1747C>G	ASIC003420:p.Gln583Glu	19	59	32.2034	27	61	44.2623	0.0600299	0.189361	0.72271
1418	AS2_scf7180000695473	52842	C	T	ASIC003420-RA:c.1733G>A	ASIC003420:p.Gly578Asp	24	63	38.0952	27	61	44.2623	0.113868	0.219799	0.657973
1419	AS2_scf7180000695473	52995	T	A	ASIC003420-RA:c.1580A>T	ASIC003420:p.Gln527Leu	21	60	35	23	53	43.3962	0.101481	0.216024	0.665498
1420	AS2_scf7180000695473	53151	C	T	ASIC003420-RA:c.1504G>A	ASIC003420:p.Asp502Asn	27	68	39.7059	35	81	43.2099	0.120885	0.220995	0.655617
1421	AS2_scf7180000695473	53245	T	C	ASIC003420-RA:c.1410A>G	ASIC003420:p.Ile470Met	46	68	67.6471	54	77	70.1299	0.135318	0.223344	0.651026
1422	AS2_scf7180000695473	53255	T	G	ASIC003420-RA:c.1400A>C	ASIC003420:p.Glu467Ala	23	75	30.6667	37	93	39.7849	0.0613675	0.190781	0.719465
1423	AS2_scf7180000695473	53299	T	A	ASIC003420-RA:c.1356A>T	ASIC003420:p.Gln452His	27	71	38.0282	36	96	37.5	0.127831	0.222683	0.652313
1424	AS2_scf7180000695473	53303	A	G	ASIC003420-RA:c.1352T>C	ASIC003420:p.Met451Thr	30	71	42.2535	35	94	37.234	0.103208	0.217043	0.663454
1425	AS2_scf7180000695473	53307	T	G	ASIC003420-RA:c.1348A>C	ASIC003420:p.Lys450Gln	31	75	41.3333	37	97	38.1443	0.114069	0.219773	0.658027
1426	AS2_scf7180000695473	53322	T	C	ASIC003420-RA:c.1333A>G	ASIC003420:p.Ile445Val	40	73	54.7945	48	94	51.0638	0.110838	0.219234	0.659091
1427	AS2_scf7180000695473	53692	T	C	ASIC003420-RA:c.1117A>G	ASIC003420:p.Asn373Asp	32	40	80	36	53	67.9245	0.0826283	0.207078	0.683867
1428	AS2_scf7180000695473	53780	C	T	ASIC003420-RA:c.1029G>A	ASIC003420:p.Met343Ile	23	54	42.5926	25	56	44.6429	0.148899	0.221646	0.654341
1429	AS2_scf7180000695473	54003	A	C	ASIC003420-RA:c.879T>G	ASIC003420:p.Phe293Leu	27	50	54	28	48	58.3333	0.14713	0.222067	0.653516
1430	AS2_scf7180000695473	54005	A	C	ASIC003420-RA:c.877T>G	ASIC003420:p.Phe293Val	29	50	58	29	48	60.4167	0.158094	0.217519	0.662502
1431	AS2_scf7180000695473	54013	G	A	ASIC003420-RA:c.869C>T	ASIC003420:p.Pro290Leu	24	50	48	19	51	37.2549	0.0887405	0.209631	0.678544
1432	AS2_scf7180000695473	54017	T	C	ASIC003420-RA:c.865A>G	ASIC003420:p.Ser289Gly	25	49	51.0204	28	51	54.902	0.14735	0.221908	0.653826
1433	AS2_scf7180000695473	54054	G	T	ASIC003420-RA:c.828C>A	ASIC003420:p.Asp276Glu	17	47	36.1702	21	49	42.8571	0.132703	0.22306	0.651578
1434	AS2_scf7180000695473	54056	C	G	ASIC003420-RA:c.826G>C	ASIC003420:p.Asp276His	17	47	36.1702	21	47	44.6809	0.117668	0.221024	0.65556
1435	AS2_scf7180000695473	54062	A	T	ASIC003420-RA:c.820T>A	ASIC003420:p.Ser274Thr	16	42	38.0952	15	45	33.3333	0.15928	0.21685	0.66384
1436	AS2_scf7180000695473	54089	A	T	ASIC003420-RA:c.793T>A	ASIC003420:p.Ser265Thr	20	58	34.4828	36	78	46.1538	0.0556612	0.185235	0.732277
1437	AS2_scf7180000695473	54126	T	G	ASIC003420-RA:c.756A>C	ASIC003420:p.Lys252Asn	32	65	49.2308	29	95	30.5263	0.00778415	0.0795454	1.09939
1438	AS2_scf7180000695473	54147	A	T	ASIC003420-RA:c.735T>A	ASIC003420:p.Asp245Glu	27	68	39.7059	50	97	51.5464	0.0413383	0.16499	0.782543
1439	AS2_scf7180000695473	54168	T	G	ASIC003420-RA:c.714A>C	ASIC003420:p.Lys238Asn	22	62	35.4839	46	86	53.4884	0.012857	0.10076	0.996713
1440	AS2_scf7180000695473	54179	C	G	ASIC003420-RA:c.703G>C	ASIC003420:p.Val235Leu	25	58	43.1034	46	83	55.4217	0.0487953	0.177299	0.751293
1441	AS2_scf7180000695473	54182	G	T	ASIC003420-RA:c.700C>A	ASIC003420:p.Leu234Met	24	59	40.678	46	82	56.0976	0.0269616	0.139416	0.855689
1442	AS2_scf7180000695473	54191	G	T	ASIC003420-RA:c.691C>A	ASIC003420:p.Gln231Lys	29	56	51.7857	32	83	38.5542	0.0426745	0.167259	0.776611
1443	AS2_scf7180000695473	54302	T	A	ASIC003420-RA:c.580A>T	ASIC003420:p.Met194Leu	77	79	97.4684	69	74	93.2432	0.146493	0.222255	0.653148
1444	AS2_scf7180000695473	54427	A	G	ASIC003420-RA:c.455T>C	ASIC003420:p.Val152Ala	74	77	96.1039	90	93	96.7742	0.309567	0.327569	0.484697
1445	AS2_scf7180000695473	54475	A	G	ASIC003420-RA:c.407T>C	ASIC003420:p.Met136Thr	60	60	100	78	79	98.7342	0.568345	0.568728	0.245095
1446	AS2_scf7180000695473	54532	T	G	ASIC003420-RA:c.350A>C	ASIC003420:p.Asn117Thr	42	49	85.7143	48	51	94.1176	0.103342	0.217156	0.663228
1447	AS2_scf7180000695473	54545	G	A	ASIC003420-RA:c.337C>T	ASIC003420:p.Leu113Phe	24	44	54.5455	28	44	63.6364	0.11871	0.221077	0.655457
1448	AS2_scf7180000695473	54547	T	A	ASIC003420-RA:c.335A>T	ASIC003420:p.Glu112Val	36	44	81.8182	36	44	81.8182	0.21697	0.242562	0.615177
1449	AS2_scf7180000695473	54552	C	A	ASIC003420-RA:c.330G>T	ASIC003420:p.Glu110Asp	34	55	61.8182	38	56	67.8571	0.126625	0.222575	0.652524
1450	AS2_scf7180000695473	54584	T	C	ASIC003420-RA:c.298A>G	ASIC003420:p.Asn100Asp	66	67	98.5075	56	61	91.8033	0.0734922	0.199844	0.699309
1451	AS2_scf7180000695473	54601	C	T	ASIC003420-RA:c.281G>A	ASIC003420:p.Ser94Asn	63	64	98.4375	57	63	90.4762	0.0486648	0.176943	0.752166
1452	AS2_scf7180000695473	54738	G	C	ASIC003420-RA:c.199C>G	ASIC003420:p.Leu67Val	37	89	41.573	23	69	33.3333	0.0757103	0.201254	0.696256
1453	AS2_scf7180000695473	54753	C	T	ASIC003420-RA:c.184G>A	ASIC003420:p.Gly62Ser	37	82	45.122	35	87	40.2299	0.100745	0.215524	0.666505
1454	AS2_scf7180000695473	54755	T	A	ASIC003420-RA:c.182A>T	ASIC003420:p.Asp61Val	37	80	46.25	35	83	42.1687	0.109344	0.218769	0.660015
1455	AS2_scf7180000695473	54783	G	C	ASIC003420-RA:c.154C>G	ASIC003420:p.Leu52Val	39	88	44.3182	39	88	44.3182	0.120546	0.221143	0.655326
1456	AS2_scf7180000695473	54795	C	G	ASIC003420-RA:c.142G>C	ASIC003420:p.Gly48Arg	31	84	36.9048	38	86	44.186	0.0781916	0.20306	0.692377
1457	AS2_scf7180000695473	54864	C	G	ASIC003420-RA:c.73G>C	ASIC003420:p.Val25Leu	42	103	40.7767	31	81	38.2716	0.113832	0.219808	0.657956
1458	AS2_scf7180000695473	101437	C	T	ASIC003368-RA:c.487G>A	ASIC003368:p.Ala163Thr	27	43	62.7907	15	44	34.0909	0.00486155	0.0643742	1.19129
1459	AS2_scf7180000695473	101557	A	G	ASIC003368-RA:c.367T>C	ASIC003368:p.Cys123Arg	42	47	89.3617	36	42	85.7143	0.220339	0.245389	0.610146
1460	AS2_scf7180000695473	101560	C	T	ASIC003368-RA:c.364G>A	ASIC003368:p.Gly122Arg	29	47	61.7021	28	42	66.6667	0.156005	0.218809	0.659935
1461	AS2_scf7180000695473	101790	C	T	ASIC003368-RA:c.134G>A	ASIC003368:p.Arg45His	23	47	48.9362	30	49	61.2245	0.0791622	0.203574	0.691277
1462	AS2_scf7180000695473	142823	C	T	ASIC003370-RA:c.11C>T	ASIC003370:p.Pro4Leu	20	47	42.5532	21	44	47.7273	0.147859	0.221694	0.654247
1463	AS2_scf7180000695473	148899	A	T	ASIC003371-RA:c.67A>T	ASIC003371:p.Lys23*	12	42	28.5714	20	44	45.4545	0.0488246	0.177327	0.751225
1464	AS2_scf7180000695473	158328	G	A	ASIC003372-RA:c.472G>A	ASIC003372:p.Val158Met	38	41	92.6829	36	43	83.7209	0.124414	0.222542	0.652589
1465	AS2_scf7180000695473	166326	T	C	ASIC003373-RA:c.152A>G	ASIC003373:p.Glu51Gly	11	40	27.5	25	46	54.3478	0.00749617	0.0782667	1.10642
1466	AS2_scf7180000695473	167129	A	G	ASIC003374-RA:c.37A>G	ASIC003374:p.Met13Val	42	46	91.3043	51	54	94.4444	0.252858	0.274149	0.562013
1467	AS2_scf7180000695473	167486	C	T	ASIC003374-RA:c.394C>T	ASIC003374:p.His132Tyr	31	47	65.9574	23	44	52.2727	0.0710992	0.198253	0.702781
1468	AS2_scf7180000695473	167495	C	T	ASIC003374-RA:c.403C>T	ASIC003374:p.His135Tyr	30	48	62.5	25	43	58.1395	0.155348	0.219016	0.659525
1469	AS2_scf7180000695473	167499	T	C	ASIC003374-RA:c.407T>C	ASIC003374:p.Leu136Pro	18	50	36	18	42	42.8571	0.135779	0.223427	0.650865
1470	AS2_scf7180000695473	182868	A	T	ASIC003378-RA:c.295T>A	ASIC003378:p.Phe99Ile	40	47	85.1064	40	41	97.561	0.0401163	0.1631	0.787545
1471	AS2_scf7180000695473	186085	G	T	ASIC003379-RA:c.58G>T	ASIC003379:p.Glu20*	31	44	70.4545	30	47	63.8298	0.141718	0.223197	0.651312
1472	AS2_scf7180000695473	197124	C	T	ASIC003380-RA:c.511C>T	ASIC003380:p.Arg171Cys	20	41	48.7805	22	51	43.1373	0.144307	0.22264	0.652397
1473	AS2_scf7180000695473	202966	C	G	ASIC003381-RA:c.3506G>C	ASIC003381:p.Gly1169Ala	47	47	100	40	44	90.9091	0.0507923	0.179837	0.745122
1474	AS2_scf7180000695473	202980	A	T	ASIC003381-RA:c.3492T>A	ASIC003381:p.Asp1164Glu	20	47	42.5532	14	42	33.3333	0.117177	0.220609	0.656376
1475	AS2_scf7180000695473	205510	G	C	ASIC003381-RA:c.1295C>G	ASIC003381:p.Thr432Ser	36	42	85.7143	36	44	81.8182	0.20486	0.231944	0.634617
1476	AS2_scf7180000695473	209062	A	T	ASIC003382-RA:c.592T>A	ASIC003382:p.Tyr198Asn	17	45	37.7778	20	50	40	0.162818	0.215176	0.667205
1477	AS2_scf7180000695473	209104	G	A	ASIC003382-RA:c.550C>T	ASIC003382:p.His184Tyr	45	75	60	38	66	57.5758	0.130407	0.222264	0.653131
1478	AS2_scf7180000695473	209125	C	T	ASIC003382-RA:c.529G>A	ASIC003382:p.Gly177Ser	68	80	85	62	71	87.3239	0.171832	0.209626	0.678555
1479	AS2_scf7180000695473	209203	T	C	ASIC003382-RA:c.451A>G	ASIC003382:p.Ile151Val	24	50	48	32	54	59.2593	0.0813039	0.205683	0.686802
1480	AS2_scf7180000695473	209211	T	G	ASIC003382-RA:c.443A>C	ASIC003382:p.Glu148Ala	18	46	39.1304	25	52	48.0769	0.109538	0.218836	0.659881
1481	AS2_scf7180000695473	209215	C	T	ASIC003382-RA:c.439G>A	ASIC003382:p.Val147Ile	18	45	40	25	53	47.1698	0.126207	0.222535	0.652602
1482	AS2_scf7180000695473	209221	G	T	ASIC003382-RA:c.433C>A	ASIC003382:p.Pro145Thr	37	41	90.2439	43	50	86	0.213739	0.239722	0.620293
1483	AS2_scf7180000695473	211885	C	G	ASIC003383-RA:c.441G>C	ASIC003383:p.Lys147Asn	23	40	57.5	27	41	65.8537	0.134897	0.223167	0.651369
1484	AS2_scf7180000695473	211995	C	T	ASIC003383-RA:c.331G>A	ASIC003383:p.Asp111Asn	34	55	61.8182	20	45	44.4444	0.036316	0.156282	0.806091
1485	AS2_scf7180000695473	211999	T	A	ASIC003383-RA:c.327A>T	ASIC003383:p.Glu109Asp	33	55	60	20	46	43.4783	0.0410736	0.164576	0.783633
1486	AS2_scf7180000695473	225199	T	A	ASIC003385-RA:c.736A>T	ASIC003385:p.Ile246Phe	40	55	72.7273	40	58	68.9655	0.149141	0.221563	0.654503
1487	AS2_scf7180000695473	225250	T	C	ASIC003385-RA:c.685A>G	ASIC003385:p.Ser229Gly	37	53	69.8113	43	59	72.8814	0.155334	0.219014	0.659528
1488	AS2_scf7180000695473	225267	T	G	ASIC003385-RA:c.668A>C	ASIC003385:p.Asp223Ala	38	62	61.2903	37	56	66.0714	0.131765	0.22256	0.652554
1489	AS2_scf7180000695473	225645	T	G	ASIC003385-RA:c.290A>C	ASIC003385:p.Tyr97Ser	28	71	39.4366	30	85	35.2941	0.11455	0.219663	0.658243
1490	AS2_scf7180000695473	225678	C	G	ASIC003385-RA:c.257G>C	ASIC003385:p.Ser86Thr	21	62	33.871	33	90	36.6667	0.129004	0.222472	0.652725
1491	AS2_scf7180000695473	225682	G	C	ASIC003385-RA:c.253C>G	ASIC003385:p.Pro85Ala	40	63	63.4921	61	84	72.619	0.0712891	0.198511	0.702215
1492	AS2_scf7180000695473	244801	C	A	ASIC003390-RA:c.611C>A	ASIC003390:p.Thr204Lys	30	43	69.7674	23	41	56.0976	0.0784083	0.203267	0.691933
1493	AS2_scf7180000695473	248820	A	C	ASIC003391-RA:c.160A>C	ASIC003391:p.Lys54Gln	26	41	63.4146	17	45	37.7778	0.0105416	0.0915245	1.03846
1494	AS2_scf7180000695473	248994	T	A	ASIC003391-RA:c.334T>A	ASIC003391:p.Ser112Thr	25	43	58.1395	22	43	51.1628	0.139363	0.223627	0.650476
1495	AS2_scf7180000695473	254958	T	C	ASIC003392-RA:c.143A>G	ASIC003392:p.Asn48Ser	39	51	76.4706	38	47	80.8511	0.170215	0.210435	0.676882
1496	AS2_scf7180000695473	255041	A	C	ASIC003392-RA:c.60T>G	ASIC003392:p.Phe20Leu	28	48	58.3333	18	40	45	0.0790907	0.203583	0.691259
1497	AS2_scf7180000695473	275867	A	G	ASIC003395-RA:c.149A>G	ASIC003395:p.His50Arg	19	48	39.5833	19	43	44.186	0.152788	0.220019	0.65754
1498	AS2_scf7180000695473	300268	G	T	ASIC003398-RA:c.298C>A	ASIC003398:p.His100Asn	23	42	54.7619	29	51	56.8627	0.162652	0.215288	0.666981
1499	AS2_scf7180000695473	383572	C	T	ASIC003402-RA:c.154G>A	ASIC003402:p.Gly52Ser	21	45	46.6667	23	68	33.8235	0.0616997	0.191377	0.718111
1500	AS2_scf7180000695473	385658	G	C	ASIC003404-RA:c.2467C>G	ASIC003404:p.Leu823Val	20	41	48.7805	25	42	59.5238	0.108681	0.218565	0.660419
1501	AS2_scf7180000695473	389883	T	C	ASIC003404-RA:c.1078A>G	ASIC003404:p.Asn360Asp	47	54	87.037	42	46	91.3043	0.204054	0.231224	0.635968
1502	AS2_scf7180000695473	393582	G	A	ASIC003405-RA:c.43G>A	ASIC003405:p.Val15Met	9	40	22.5	27	56	48.2143	0.00630299	0.0724268	1.1401
1503	AS2_scf7180000695473	393668	T	A	ASIC003405-RA:c.129T>A	ASIC003405:p.Ser43Arg	10	42	23.8095	24	47	51.0638	0.0053872	0.0671448	1.17299
1504	AS2_scf7180000695473	401537	T	C	ASIC003406-RA:c.140T>C	ASIC003406:p.Leu47Pro	32	41	78.0488	37	42	88.0952	0.112685	0.219355	0.658852
1505	AS2_scf7180000695473	411003	G	A	ASIC003407-RA:c.196G>A	ASIC003407:p.Glu66Lys	19	54	35.1852	24	44	54.5455	0.0263159	0.137513	0.861657
1506	AS2_scf7180000695473	419998	C	G	ASIC003408-RA:c.564C>G	ASIC003408:p.His188Gln	35	41	85.3659	35	40	87.5	0.24403	0.266238	0.57473
1507	AS2_scf7180000695473	420224	T	C	ASIC003408-RA:c.790T>C	ASIC003408:p.Cys264Arg	18	44	40.9091	21	46	45.6522	0.152235	0.220388	0.656813
1508	AS2_scf7180000695473	427873	A	G	ASIC003409-RA:c.32T>C	ASIC003409:p.Leu11Ser	46	47	97.8723	40	41	97.561	0.503396	0.512747	0.290097
1509	AS2_scf7180000695473	427883	C	T	ASIC003409-RA:c.22G>A	ASIC003409:p.Asp8Asn	20	47	42.5532	16	41	39.0244	0.162781	0.215198	0.667162
1510	AS2_scf7180000695473	463369	T	G	ASIC003414-RA:c.586A>C	ASIC003414:p.Met196Leu	26	40	65	18	42	42.8571	0.0240073	0.132886	0.876522
1511	AS2_scf7180000695473	472375	A	C	ASIC003416-RA:c.792T>G	ASIC003416:p.His264Gln	28	40	70	40	53	75.4717	0.156323	0.21871	0.660132
1512	AS2_scf7180000695473	472591	A	C	ASIC003416-RA:c.576T>G	ASIC003416:p.Asp192Glu	12	41	29.2683	21	40	52.5	0.0192815	0.120898	0.917581
1513	AS2_scf7180000695473	478093	C	T	ASIC003417-RA:c.35C>T	ASIC003417:p.Ala12Val	23	42	54.7619	24	41	58.5366	0.165136	0.213357	0.670894
1514	AS2_scf7180000695473	478117	A	G	ASIC003417-RA:c.59A>G	ASIC003417:p.His20Arg	17	45	37.7778	17	41	41.4634	0.16435	0.213948	0.669692
1515	AS2_scf7180000695473	478520	T	A	ASIC003417-RA:c.299T>A	ASIC003417:p.Val100Asp	46	49	93.8776	62	68	91.1765	0.244169	0.266355	0.57454
1516	AS2_scf7180000695473	478807	A	T	ASIC003417-RA:c.586A>T	ASIC003417:p.Met196Leu	52	58	89.6552	58	66	87.8788	0.213714	0.239726	0.620285
1517	AS2_scf7180000695473	478832	A	G	ASIC003417-RA:c.611A>G	ASIC003417:p.Asp204Gly	54	62	87.0968	50	66	75.7576	0.0479269	0.175904	0.754724
1518	AS2_scf7180000695473	478867	C	A	ASIC003417-RA:c.646C>A	ASIC003417:p.Gln216Lys	44	65	67.6923	31	58	53.4483	0.0404232	0.163575	0.786284
1519	AS2_scf7180000695473	478963	T	C	ASIC003417-RA:c.742T>C	ASIC003417:p.Tyr248His	35	70	50	18	68	26.4706	0.00248738	0.046397	1.33351
1520	AS2_scf7180000695473	479115	A	C	ASIC003417-RA:c.894A>C	ASIC003417:p.Gln298His	42	43	97.6744	41	42	97.619	0.505882	0.513105	0.289794
1521	AS2_scf7180000695473	479118	T	G	ASIC003417-RA:c.897T>G	ASIC003417:p.Asp299Glu	44	44	100	42	44	95.4545	0.247126	0.269042	0.57018
1522	AS2_scf7180000695474	143550	A	C	ASIC003430-RA:c.602T>G	ASIC003430:p.Val201Gly	36	43	83.7209	36	42	85.7143	0.228805	0.252766	0.597281
1523	AS2_scf7180000695474	143872	C	T	ASIC003430-RA:c.437G>A	ASIC003430:p.Gly146Asp	42	42	100	43	44	97.7273	0.511628	0.517327	0.286235
1524	AS2_scf7180000695474	144293	T	C	ASIC003430-RA:c.16A>G	ASIC003430:p.Ile6Val	29	48	60.4167	32	50	64	0.154422	0.219491	0.658584
1525	AS2_scf7180000695474	144967	A	G	ASIC003431-RA:c.91T>C	ASIC003431:p.Tyr31His	18	43	41.8605	14	45	31.1111	0.102395	0.216531	0.66448
1526	AS2_scf7180000695474	159537	G	C	ASIC003432-RA:c.414C>G	ASIC003432:p.Asp138Glu	18	43	41.8605	25	45	55.5556	0.0751375	0.200973	0.696861
1527	AS2_scf7180000695474	159859	G	A	ASIC003432-RA:c.92C>T	ASIC003432:p.Ala31Val	37	40	92.5	49	50	98	0.193332	0.222374	0.652916
1528	AS2_scf7180000695474	170824	A	G	ASIC003433-RA:c.98T>C	ASIC003433:p.Ile33Thr	20	45	44.4444	11	40	27.5	0.0493775	0.17799	0.749605
1529	AS2_scf7180000695474	239184	G	A	ASIC003425-RA:c.28C>T	ASIC003425:p.Pro10Ser	25	45	55.5556	27	53	50.9434	0.145283	0.222631	0.652414
1530	AS2_scf7180000695474	239192	G	A	ASIC003425-RA:c.20C>T	ASIC003425:p.Ser7Phe	19	42	45.2381	22	49	44.898	0.167098	0.212003	0.673659
1531	AS2_scf7180000695474	242326	G	T	ASIC003426-RA:c.161G>T	ASIC003426:p.Cys54Phe	45	47	95.7447	45	45	100	0.258242	0.279079	0.554273
1532	AS2_scf7180000695475	23309	C	G	ASIC003468-RA:c.28G>C	ASIC003468:p.Ala10Pro	34	45	75.5556	40	51	78.4314	0.181252	0.213053	0.671512
1533	AS2_scf7180000695475	35440	G	C	ASIC003470-RA:c.40G>C	ASIC003470:p.Ala14Pro	19	47	40.4255	15	44	34.0909	0.141881	0.22311	0.651481
1534	AS2_scf7180000695475	35725	T	G	ASIC003470-RA:c.325T>G	ASIC003470:p.Trp109Gly	28	42	66.6667	29	46	63.0435	0.16617	0.212542	0.672555
1535	AS2_scf7180000695475	35727	G	A	ASIC003470-RA:c.327G>A	ASIC003470:p.Trp109*	28	41	68.2927	29	46	63.0435	0.157236	0.218325	0.660897
1536	AS2_scf7180000695475	35800	A	G	ASIC003470-RA:c.400A>G	ASIC003470:p.Arg134Gly	25	48	52.0833	25	50	50	0.156736	0.218427	0.660693
1537	AS2_scf7180000695475	36092	G	T	ASIC003470-RA:c.692G>T	ASIC003470:p.Gly231Val	16	44	36.3636	21	52	40.3846	0.153997	0.219554	0.658459
1538	AS2_scf7180000695475	38236	C	T	ASIC003471-RA:c.1245G>A	ASIC003471:p.Met415Ile	26	46	56.5217	17	47	36.1702	0.0244196	0.133094	0.875841
1539	AS2_scf7180000695475	38261	G	A	ASIC003471-RA:c.1220C>T	ASIC003471:p.Pro407Leu	23	40	57.5	10	40	25	0.0023601	0.044894	1.34781
1540	AS2_scf7180000695475	38405	T	C	ASIC003471-RA:c.1076A>G	ASIC003471:p.Glu359Gly	25	42	59.5238	35	47	74.4681	0.0593038	0.188343	0.725051
1541	AS2_scf7180000695475	38962	T	A	ASIC003471-RA:c.519A>T	ASIC003471:p.Glu173Asp	31	46	67.3913	28	47	59.5745	0.126305	0.222443	0.652782
1542	AS2_scf7180000695475	53001	C	T	ASIC003438-RA:c.1838C>T	ASIC003438:p.Ala613Val	25	47	53.1915	32	57	56.1404	0.149898	0.221279	0.65506
1543	AS2_scf7180000695475	53028	A	T	ASIC003438-RA:c.1865A>T	ASIC003438:p.Lys622Met	25	44	56.8182	33	56	58.9286	0.157904	0.217716	0.662109
1544	AS2_scf7180000695475	53051	G	C	ASIC003438-RA:c.1888G>C	ASIC003438:p.Ala630Pro	20	45	44.4444	19	44	43.1818	0.167829	0.211371	0.674955
1545	AS2_scf7180000695475	53058	T	C	ASIC003438-RA:c.1895T>C	ASIC003438:p.Val632Ala	32	47	68.0851	27	40	67.5	0.181435	0.213024	0.671572
1546	AS2_scf7180000695475	54783	C	G	ASIC003438-RA:c.2458C>G	ASIC003438:p.Pro820Ala	16	48	33.3333	19	40	47.5	0.0704981	0.197758	0.703866
1547	AS2_scf7180000695475	54909	G	A	ASIC003438-RA:c.2584G>A	ASIC003438:p.Ala862Thr	23	56	41.0714	17	49	34.6939	0.128098	0.222649	0.652379
1548	AS2_scf7180000695475	56167	A	C	ASIC003438-RA:c.3551A>C	ASIC003438:p.Asn1184Thr	32	40	80	42	47	89.3617	0.115285	0.21991	0.657755
1549	AS2_scf7180000695475	66622	A	G	ASIC003441-RA:c.611T>C	ASIC003441:p.Leu204Pro	23	44	52.2727	9	44	20.4545	0.00143914	0.0352028	1.45342
1550	AS2_scf7180000695475	66662	T	C	ASIC003441-RA:c.571A>G	ASIC003441:p.Lys191Glu	41	45	91.1111	45	45	100	0.0583107	0.18708	0.727973
1551	AS2_scf7180000695475	66670	T	A	ASIC003441-RA:c.563A>T	ASIC003441:p.Glu188Val	39	43	90.6977	49	50	98	0.118729	0.221036	0.655537
1552	AS2_scf7180000695475	66793	T	C	ASIC003441-RA:c.440A>G	ASIC003441:p.Glu147Gly	44	47	93.617	45	45	100	0.129121	0.222486	0.652697
1553	AS2_scf7180000695475	66937	A	G	ASIC003441-RA:c.296T>C	ASIC003441:p.Val99Ala	19	42	45.2381	19	45	42.2222	0.164434	0.21387	0.669849
1554	AS2_scf7180000695475	67113	A	C	ASIC003441-RA:c.120T>G	ASIC003441:p.Asp40Glu	20	44	45.4545	15	45	33.3333	0.0877564	0.209426	0.67897
1555	AS2_scf7180000695475	104443	T	C	ASIC003448-RA:c.913A>G	ASIC003448:p.Thr305Ala	20	40	50	12	41	29.2683	0.0300617	0.145156	0.838165
1556	AS2_scf7180000695475	104715	A	T	ASIC003448-RA:c.641T>A	ASIC003448:p.Leu214Gln	28	44	63.6364	35	51	68.6275	0.150987	0.220931	0.655743
1557	AS2_scf7180000695475	104734	G	A	ASIC003448-RA:c.622C>T	ASIC003448:p.Leu208Phe	16	40	40	20	49	40.8163	0.171209	0.209791	0.678214
1558	AS2_scf7180000695475	105195	G	C	ASIC003448-RA:c.161C>G	ASIC003448:p.Thr54Ser	26	44	59.0909	16	40	40	0.0385418	0.160492	0.794545
1559	AS2_scf7180000695475	109720	G	A	ASIC003450-RA:c.103G>A	ASIC003450:p.Ala35Thr	24	45	53.3333	21	49	42.8571	0.0986105	0.214468	0.668638
1560	AS2_scf7180000695475	109727	C	T	ASIC003450-RA:c.110C>T	ASIC003450:p.Thr37Ile	13	43	30.2326	25	48	52.0833	0.0187259	0.119105	0.92407
1561	AS2_scf7180000695475	109730	G	A	ASIC003450-RA:c.113G>A	ASIC003450:p.Gly38Asp	13	42	30.9524	24	47	51.0638	0.0276706	0.140328	0.852855
1562	AS2_scf7180000695475	110486	C	T	ASIC003450-RA:c.301C>T	ASIC003450:p.Pro101Ser	32	43	74.4186	26	41	63.4146	0.10436	0.217923	0.661696
1563	AS2_scf7180000695475	120436	A	G	ASIC003451-RA:c.155T>C	ASIC003451:p.Leu52Pro	25	47	53.1915	30	41	73.1707	0.0278568	0.140575	0.852093
1564	AS2_scf7180000695475	147505	A	T	ASIC003453-RA:c.29A>T	ASIC003453:p.Asn10Ile	26	42	61.9048	23	40	57.5	0.164167	0.213983	0.669621
1565	AS2_scf7180000695475	148081	A	C	ASIC003453-RA:c.423A>C	ASIC003453:p.Lys141Asn	24	45	53.3333	38	46	82.6087	0.00202651	0.0415995	1.38091
1566	AS2_scf7180000695475	148097	T	A	ASIC003453-RA:c.439T>A	ASIC003453:p.Ser147Thr	18	43	41.8605	38	48	79.1667	0.000216227	0.0140204	1.85324
1567	AS2_scf7180000695475	150097	T	C	ASIC003454-RA:c.23A>G	ASIC003454:p.His8Arg	19	43	44.186	20	43	46.5116	0.167427	0.211746	0.674185
1568	AS2_scf7180000695475	158222	T	C	ASIC003456-RA:c.392A>G	ASIC003456:p.Lys131Arg	37	46	80.4348	27	40	67.5	0.078043	0.203126	0.692235
1569	AS2_scf7180000695475	176952	A	G	ASIC003458-RA:c.4A>G	ASIC003458:p.Lys2Glu	37	45	82.2222	42	46	91.3043	0.111489	0.219354	0.658855
1570	AS2_scf7180000695475	188728	C	T	ASIC003460-RA:c.127C>T	ASIC003460:p.Arg43Cys	23	45	51.1111	30	41	73.1707	0.0199284	0.122463	0.911994
1571	AS2_scf7180000695475	218860	C	T	ASIC003463-RA:c.355G>A	ASIC003463:p.Val119Met	29	45	64.4444	39	56	69.6429	0.144773	0.222748	0.652185
1572	AS2_scf7180000695475	224100	T	A	ASIC003465-RA:c.167A>T	ASIC003465:p.His56Leu	35	47	74.4681	28	40	70	0.170368	0.21021	0.677347
1573	AS2_scf7180000695475	231842	A	G	ASIC003466-RA:c.211A>G	ASIC003466:p.Thr71Ala	12	40	30	18	43	41.8605	0.0976803	0.213639	0.67032
1574	AS2_scf7180000695475	231852	A	G	ASIC003466-RA:c.221A>G	ASIC003466:p.His74Arg	38	41	92.6829	46	52	88.4615	0.225633	0.249989	0.602079
1575	AS2_scf7180000695476	34404	G	A	ASIC003543-RA:c.235G>A	ASIC003543:p.Gly79Arg	17	43	39.5349	24	50	48	0.119409	0.221395	0.654833
1576	AS2_scf7180000695476	35935	A	G	ASIC003554-RA:c.586A>G	ASIC003554:p.Ile196Val	21	42	50	22	43	51.1628	0.170627	0.210244	0.677276
1577	AS2_scf7180000695476	36245	C	T	ASIC003554-RA:c.896C>T	ASIC003554:p.Ala299Val	30	48	62.5	36	44	81.8182	0.0228654	0.130227	0.885299
1578	AS2_scf7180000695476	36984	C	A	ASIC003554-RA:c.1635C>A	ASIC003554:p.Ser545Arg	45	49	91.8367	41	41	100	0.0829199	0.207363	0.683269
1579	AS2_scf7180000695476	37724	T	C	ASIC003554-RA:c.2375T>C	ASIC003554:p.Val792Ala	23	43	53.4884	24	43	55.814	0.167427	0.211729	0.674219
1580	AS2_scf7180000695476	38029	A	T	ASIC003554-RA:c.2680A>T	ASIC003554:p.Thr894Ser	18	43	41.8605	26	50	52	0.103363	0.217145	0.663249
1581	AS2_scf7180000695476	38197	T	A	ASIC003554-RA:c.2848T>A	ASIC003554:p.Ser950Thr	30	50	60	26	48	54.1667	0.13677	0.223393	0.65093
1582	AS2_scf7180000695476	38323	T	C	ASIC003554-RA:c.2974T>C	ASIC003554:p.Ser992Pro	43	51	84.3137	41	45	91.1111	0.15188	0.220538	0.656516
1583	AS2_scf7180000695476	54905	T	G	ASIC003565-RA:c.125T>G	ASIC003565:p.Leu42Arg	32	42	76.1905	39	41	95.122	0.0124581	0.0993489	1.00284
1584	AS2_scf7180000695476	55833	C	T	ASIC003565-RA:c.968C>T	ASIC003565:p.Ala323Val	28	45	62.2222	21	40	52.5	0.116318	0.220414	0.65676
1585	AS2_scf7180000695476	67462	T	C	ASIC003576-RA:c.5T>C	ASIC003576:p.Val2Ala	43	47	91.4894	36	44	81.8182	0.100196	0.21545	0.666654
1586	AS2_scf7180000695476	68796	C	G	ASIC003576-RA:c.1339C>G	ASIC003576:p.Pro447Ala	27	47	57.4468	28	47	59.5745	0.162137	0.215585	0.666382
1587	AS2_scf7180000695476	69178	C	A	ASIC003576-RA:c.1721C>A	ASIC003576:p.Thr574Asn	38	42	90.4762	43	50	86	0.207992	0.234645	0.629589
1588	AS2_scf7180000695476	72956	T	G	ASIC003587-RA:c.173A>C	ASIC003587:p.Gln58Pro	47	50	94	39	41	95.122	0.345601	0.362926	0.440182
1589	AS2_scf7180000695476	73094	G	T	ASIC003587-RA:c.35C>A	ASIC003587:p.Pro12Gln	21	41	51.2195	25	55	45.4545	0.140155	0.223821	0.650099
1590	AS2_scf7180000695476	74036	A	C	ASIC003598-RA:c.203A>C	ASIC003598:p.Asn68Thr	17	42	40.4762	26	43	60.4651	0.032318	0.149301	0.825938
1591	AS2_scf7180000695476	85281	A	C	ASIC003474-RA:c.2592T>G	ASIC003474:p.Asp864Glu	26	44	59.0909	26	41	63.4146	0.162361	0.215426	0.666702
1592	AS2_scf7180000695476	86395	G	T	ASIC003474-RA:c.1478C>A	ASIC003474:p.Ala493Glu	27	44	61.3636	25	50	50	0.0904237	0.210623	0.676493
1593	AS2_scf7180000695476	86900	T	A	ASIC003474-RA:c.973A>T	ASIC003474:p.Thr325Ser	38	42	90.4762	45	45	100	0.0502854	0.179051	0.747024
1594	AS2_scf7180000695476	86906	C	T	ASIC003474-RA:c.967G>A	ASIC003474:p.Asp323Asn	17	46	36.9565	18	46	39.1304	0.166059	0.212665	0.672303
1595	AS2_scf7180000695476	86918	G	A	ASIC003474-RA:c.955C>T	ASIC003474:p.Pro319Ser	30	45	66.6667	32	44	72.7273	0.150983	0.220964	0.655678
1596	AS2_scf7180000695476	86956	T	G	ASIC003474-RA:c.917A>C	ASIC003474:p.Gln306Pro	37	47	78.7234	40	49	81.6327	0.189454	0.219163	0.659232
1597	AS2_scf7180000695476	87059	C	T	ASIC003474-RA:c.814G>A	ASIC003474:p.Gly272Ser	54	56	96.4286	40	41	97.561	0.428242	0.444821	0.351815
1598	AS2_scf7180000695476	87098	T	C	ASIC003474-RA:c.775A>G	ASIC003474:p.Thr259Ala	46	56	82.1429	44	48	91.6667	0.087133	0.209068	0.679712
1599	AS2_scf7180000695476	91112	G	T	ASIC003485-RA:c.1219C>A	ASIC003485:p.Leu407Met	36	45	80	27	43	62.7907	0.0389616	0.161664	0.791386
1600	AS2_scf7180000695476	134200	G	A	ASIC003518-RA:c.2308G>A	ASIC003518:p.Ala770Thr	26	48	54.1667	20	40	50	0.157349	0.218332	0.660882
1601	AS2_scf7180000695476	134311	G	A	ASIC003518-RA:c.2419G>A	ASIC003518:p.Asp807Asn	40	45	88.8889	28	46	60.8696	0.00163323	0.0369627	1.43224
1602	AS2_scf7180000695476	135247	A	G	ASIC003519-RA:c.116A>G	ASIC003519:p.Asn39Ser	31	41	75.6098	31	42	73.8095	0.19556	0.224148	0.649465
1603	AS2_scf7180000695476	172510	A	C	ASIC003524-RA:c.1892A>C	ASIC003524:p.Asn631Thr	43	43	100	38	40	95	0.22921	0.253077	0.596748
1604	AS2_scf7180000695476	173152	T	C	ASIC003524-RA:c.2534T>C	ASIC003524:p.Leu845Ser	23	41	56.0976	19	42	45.2381	0.107568	0.218371	0.660805
1605	AS2_scf7180000695476	173304	A	G	ASIC003524-RA:c.2686A>G	ASIC003524:p.Thr896Ala	36	45	80	36	46	78.2609	0.199021	0.226889	0.644187
1606	AS2_scf7180000695476	194027	T	A	ASIC003527-RA:c.10T>A	ASIC003527:p.Ser4Thr	24	50	48	20	42	47.619	0.165684	0.213087	0.671442
1607	AS2_scf7180000695476	194678	A	G	ASIC003527-RA:c.281A>G	ASIC003527:p.His94Arg	24	48	50	29	47	61.7021	0.085662	0.208198	0.681523
1608	AS2_scf7180000695476	194692	G	A	ASIC003527-RA:c.295G>A	ASIC003527:p.Ala99Thr	30	44	68.1818	34	48	70.8333	0.172449	0.209487	0.678843
1609	AS2_scf7180000695476	200521	T	C	ASIC003529-RA:c.1948A>G	ASIC003529:p.Lys650Glu	32	40	80	35	46	76.087	0.187878	0.218081	0.661382
1610	AS2_scf7180000695476	202372	A	C	ASIC003529-RA:c.157T>G	ASIC003529:p.Leu53Val	24	42	57.1429	29	40	72.5	0.0650157	0.193684	0.712906
1611	AS2_scf7180000695476	208737	G	A	ASIC003531-RA:c.112G>A	ASIC003531:p.Ala38Thr	36	40	90	34	41	82.9268	0.169465	0.210655	0.676428
1612	AS2_scf7180000695476	208764	T	C	ASIC003531-RA:c.139T>C	ASIC003531:p.Tyr47His	29	42	69.0476	25	45	55.5556	0.0769279	0.202025	0.694594
1613	AS2_scf7180000695476	208770	C	G	ASIC003531-RA:c.145C>G	ASIC003531:p.His49Asp	41	41	100	37	41	90.2439	0.0578997	0.187157	0.727793
1614	AS2_scf7180000695476	226006	G	A	ASIC003536-RA:c.221C>T	ASIC003536:p.Pro74Leu	14	40	35	16	41	39.0244	0.169775	0.210624	0.676493
1615	AS2_scf7180000695476	228129	G	A	ASIC003537-RA:c.59C>T	ASIC003537:p.Pro20Leu	42	50	84	36	45	80	0.185511	0.21624	0.665064
1616	AS2_scf7180000695476	262151	T	C	ASIC003541-RA:c.14T>C	ASIC003541:p.Leu5Ser	39	41	95.122	44	44	100	0.229692	0.253489	0.59604
1617	AS2_scf7180000695476	266987	A	G	ASIC003542-RA:c.1369A>G	ASIC003542:p.Thr457Ala	33	43	76.7442	36	41	87.8049	0.0970137	0.213208	0.671196
1618	AS2_scf7180000695476	267042	A	G	ASIC003542-RA:c.1424A>G	ASIC003542:p.Gln475Arg	43	43	100	46	47	97.8723	0.522222	0.526345	0.278729
1619	AS2_scf7180000695476	269475	C	T	ASIC003544-RA:c.7861G>A	ASIC003544:p.Ala2621Thr	39	40	97.5	43	43	100	0.481928	0.496451	0.304124
1620	AS2_scf7180000695476	271135	A	G	ASIC003544-RA:c.6392T>C	ASIC003544:p.Val2131Ala	31	41	75.6098	43	49	87.7551	0.0730305	0.199385	0.700308
1621	AS2_scf7180000695476	271209	C	A	ASIC003544-RA:c.6318G>T	ASIC003544:p.Leu2106Phe	17	44	38.6364	17	43	39.5349	0.173091	0.209381	0.679064
1622	AS2_scf7180000695476	271519	G	A	ASIC003544-RA:c.6008C>T	ASIC003544:p.Ala2003Val	43	53	81.1321	40	46	86.9565	0.161558	0.21585	0.665847
1623	AS2_scf7180000695476	271544	T	A	ASIC003544-RA:c.5983A>T	ASIC003544:p.Met1995Leu	32	57	56.1404	24	40	60	0.154313	0.219487	0.658591
1624	AS2_scf7180000695476	271553	C	T	ASIC003544-RA:c.5974G>A	ASIC003544:p.Gly1992Ser	29	56	51.7857	14	41	34.1463	0.0377318	0.158574	0.799767
1625	AS2_scf7180000695476	271904	G	C	ASIC003544-RA:c.5623C>G	ASIC003544:p.Gln1875Glu	36	42	85.7143	34	41	82.9268	0.222959	0.247766	0.605958
1626	AS2_scf7180000695476	274525	T	C	ASIC003544-RA:c.3142A>G	ASIC003544:p.Thr1048Ala	50	50	100	39	42	92.8571	0.0914158	0.211607	0.67447
1627	AS2_scf7180000695476	274807	C	T	ASIC003544-RA:c.2860G>A	ASIC003544:p.Asp954Asn	23	45	51.1111	28	44	63.6364	0.0843067	0.208218	0.681481
1628	AS2_scf7180000695476	274834	G	A	ASIC003544-RA:c.2833C>T	ASIC003544:p.Pro945Ser	19	40	47.5	24	47	51.0638	0.161287	0.216107	0.66533
1629	AS2_scf7180000695476	296984	T	A	ASIC003546-RA:c.202A>T	ASIC003546:p.Ser68Cys	41	43	95.3488	39	40	97.5	0.393117	0.409586	0.387655
1630	AS2_scf7180000695476	304370	A	G	ASIC003548-RA:c.394T>C	ASIC003548:p.Tyr132His	28	45	62.2222	42	62	67.7419	0.13651	0.223414	0.650889
1631	AS2_scf7180000695476	304472	G	C	ASIC003548-RA:c.292C>G	ASIC003548:p.Pro98Ala	18	42	42.8571	25	42	59.5238	0.0549272	0.184825	0.733239
1632	AS2_scf7180000695476	304884	T	A	ASIC003548-RA:c.8A>T	ASIC003548:p.Asp3Val	27	52	51.9231	39	49	79.5918	0.00234185	0.0446508	1.35017
1633	AS2_scf7180000695476	330072	C	G	ASIC003552-RA:c.1374G>C	ASIC003552:p.Glu458Asp	53	55	96.3636	49	51	96.0784	0.381138	0.398579	0.399486
1634	AS2_scf7180000695476	337294	C	T	ASIC003555-RA:c.92G>A	ASIC003555:p.Gly31Asp	20	44	45.4545	17	43	39.5349	0.147306	0.221964	0.653718
1635	AS2_scf7180000695476	337355	A	G	ASIC003555-RA:c.31T>C	ASIC003555:p.Ser11Pro	46	47	97.8723	39	40	97.5	0.502539	0.512194	0.290566
1636	AS2_scf7180000695476	344609	T	A	ASIC003556-RA:c.1129T>A	ASIC003556:p.Ser377Thr	30	45	66.6667	25	40	62.5	0.16584	0.212903	0.671818
1637	AS2_scf7180000695476	345141	C	G	ASIC003556-RA:c.1661C>G	ASIC003556:p.Ala554Gly	40	47	85.1064	40	41	97.561	0.0401163	0.16306	0.787653
1638	AS2_scf7180000695476	346478	G	T	ASIC003556-RA:c.2998G>T	ASIC003556:p.Ala1000Ser	32	45	71.1111	12	48	25	7.10972e-06	0.00341685	2.46637
1639	AS2_scf7180000695476	377386	G	A	ASIC003559-RA:c.107C>T	ASIC003559:p.Ala36Val	19	52	36.5385	15	45	33.3333	0.160243	0.216502	0.664539
1640	AS2_scf7180000695476	388666	A	C	ASIC003560-RA:c.1426A>C	ASIC003560:p.Ile476Leu	31	41	75.6098	30	41	73.1707	0.193232	0.222353	0.652957
1641	AS2_scf7180000695476	459605	T	C	ASIC003566-RA:c.2T>C	ASIC003566:p.Met1?	24	54	44.4444	14	42	33.3333	0.0919185	0.21196	0.673746
1642	AS2_scf7180000695476	465984	G	T	ASIC003567-RA:c.175C>A	ASIC003567:p.Pro59Thr	42	43	97.6744	49	50	98	0.502571	0.512163	0.290592
1643	AS2_scf7180000695476	492320	G	T	ASIC003570-RA:c.244C>A	ASIC003570:p.Leu82Ile	43	43	100	40	43	93.0233	0.120588	0.220972	0.655662
1644	AS2_scf7180000695476	492418	T	C	ASIC003570-RA:c.146A>G	ASIC003570:p.Asn49Ser	37	41	90.2439	41	42	97.619	0.146493	0.222215	0.653227
1645	AS2_scf7180000695476	514959	A	G	ASIC003573-RA:c.334A>G	ASIC003573:p.Lys112Glu	20	45	44.4444	14	45	31.1111	0.0747345	0.20075	0.697345
1646	AS2_scf7180000695476	552170	A	C	ASIC003577-RA:c.25A>C	ASIC003577:p.Ile9Leu	21	41	51.2195	21	45	46.6667	0.156567	0.218527	0.660495
1647	AS2_scf7180000695476	563687	T	C	ASIC003578-RA:c.200A>G	ASIC003578:p.His67Arg	17	41	41.4634	22	58	37.931	0.154982	0.21937	0.658823
1648	AS2_scf7180000695476	577302	G	C	ASIC003580-RA:c.49G>C	ASIC003580:p.Ala17Pro	31	40	77.5	29	51	56.8627	0.0215983	0.126811	0.896842
1649	AS2_scf7180000695476	577338	T	C	ASIC003580-RA:c.85T>C	ASIC003580:p.Tyr29His	10	48	20.8333	26	50	52	0.000987276	0.0291193	1.53582
1650	AS2_scf7180000695476	607050	G	A	ASIC003581-RA:c.206G>A	ASIC003581:p.Gly69Glu	30	43	69.7674	39	44	88.6364	0.0206475	0.124037	0.90645
1651	AS2_scf7180000695476	607053	A	G	ASIC003581-RA:c.209A>G	ASIC003581:p.Glu70Gly	23	40	57.5	36	42	85.7143	0.00351062	0.0544763	1.26379
1652	AS2_scf7180000695476	613527	A	T	ASIC003582-RA:c.89A>T	ASIC003582:p.Asn30Ile	39	42	92.8571	37	43	86.0465	0.169983	0.210609	0.676522
1653	AS2_scf7180000695476	615444	A	G	ASIC003583-RA:c.347A>G	ASIC003583:p.Gln116Arg	21	46	45.6522	25	50	50	0.148128	0.22167	0.654293
1654	AS2_scf7180000695476	630355	T	A	ASIC003585-RA:c.184A>T	ASIC003585:p.Arg62Trp	22	52	42.3077	15	49	30.6122	0.0789753	0.203446	0.691552
1655	AS2_scf7180000695476	633811	T	C	ASIC003586-RA:c.1A>G	ASIC003586:p.Met1?	20	42	47.619	12	40	30	0.0483253	0.176376	0.753561
1656	AS2_scf7180000695476	652695	T	A	ASIC003589-RA:c.1975T>A	ASIC003589:p.Ser659Thr	44	51	86.2745	40	48	83.3333	0.20288	0.230276	0.637751
1657	AS2_scf7180000695476	653139	T	C	ASIC003589-RA:c.2419T>C	ASIC003589:p.Ser807Pro	38	41	92.6829	36	41	87.8049	0.224137	0.248805	0.604142
1658	AS2_scf7180000695476	686878	A	G	ASIC003599-RA:c.528A>G	ASIC003599:p.Ile176Met	26	42	61.9048	37	40	92.5	0.000834644	0.0273857	1.56248
1659	AS2_scf7180000695476	698403	T	C	ASIC003603-RA:c.947A>G	ASIC003603:p.Asn316Ser	18	44	40.9091	23	46	50	0.116096	0.220301	0.656983
1660	AS2_scf7180000695476	698932	C	T	ASIC003603-RA:c.418G>A	ASIC003603:p.Gly140Ser	19	48	39.5833	20	61	32.7869	0.121812	0.22128	0.655057
1661	AS2_scf7180000695476	708431	C	T	ASIC003606-RA:c.507G>A	ASIC003606:p.Met169Ile	32	46	69.5652	31	48	64.5833	0.152648	0.220186	0.65721
1662	AS2_scf7180000695476	708528	T	C	ASIC003606-RA:c.410A>G	ASIC003606:p.Gln137Arg	38	45	84.4444	34	41	82.9268	0.224801	0.24927	0.60333
1663	AS2_scf7180000695476	708613	G	C	ASIC003606-RA:c.325C>G	ASIC003606:p.Arg109Gly	35	50	70	32	44	72.7273	0.173376	0.20943	0.67896
1664	AS2_scf7180000695476	708717	T	G	ASIC003606-RA:c.221A>C	ASIC003606:p.Lys74Thr	30	43	69.7674	21	41	51.2195	0.0400049	0.16281	0.78832
1665	AS2_scf7180000695476	708794	A	T	ASIC003606-RA:c.144T>A	ASIC003606:p.Phe48Leu	21	48	43.75	19	51	37.2549	0.131107	0.222529	0.652613
1666	AS2_scf7180000695476	733297	C	T	ASIC003475-RA:c.110C>T	ASIC003475:p.Thr37Met	24	55	43.6364	14	46	30.4348	0.0656712	0.19387	0.71249
1667	AS2_scf7180000695476	742301	A	G	ASIC003477-RA:c.20A>G	ASIC003477:p.Asn7Ser	30	50	60	29	47	61.7021	0.16236	0.215443	0.666668
1668	AS2_scf7180000695476	742388	A	G	ASIC003477-RA:c.107A>G	ASIC003477:p.Glu36Gly	38	41	92.6829	34	45	75.5556	0.0238425	0.132603	0.877448
1669	AS2_scf7180000695476	742472	C	T	ASIC003477-RA:c.191C>T	ASIC003477:p.Ala64Val	16	42	38.0952	19	40	47.5	0.122891	0.22176	0.654117
1670	AS2_scf7180000695476	745536	T	G	ASIC003479-RA:c.392A>C	ASIC003479:p.Glu131Ala	21	45	46.6667	18	41	43.9024	0.166076	0.212671	0.672292
1671	AS2_scf7180000695476	745714	G	A	ASIC003479-RA:c.214C>T	ASIC003479:p.Gln72*	23	47	48.9362	29	56	51.7857	0.150434	0.221131	0.655351
1672	AS2_scf7180000695476	747544	T	C	ASIC003480-RA:c.172A>G	ASIC003480:p.Thr58Ala	26	46	56.5217	32	44	72.7273	0.0492407	0.178007	0.749562
1673	AS2_scf7180000695476	754314	A	G	ASIC003482-RA:c.730A>G	ASIC003482:p.Lys244Glu	40	42	95.2381	37	42	88.0952	0.161706	0.215749	0.666052
1674	AS2_scf7180000695476	756385	T	C	ASIC003482-RA:c.1699T>C	ASIC003482:p.Cys567Arg	23	44	52.2727	20	42	47.619	0.15579	0.218733	0.660086
1675	AS2_scf7180000695476	758487	G	A	ASIC003483-RA:c.574C>T	ASIC003483:p.Pro192Ser	28	41	68.2927	35	48	72.9167	0.164652	0.213881	0.669828
1676	AS2_scf7180000695476	758490	C	T	ASIC003483-RA:c.571G>A	ASIC003483:p.Ala191Thr	17	41	41.4634	23	52	44.2308	0.161284	0.216139	0.665267
1677	AS2_scf7180000695476	791538	C	T	ASIC003486-RA:c.304C>T	ASIC003486:p.Pro102Ser	23	46	50	14	44	31.8182	0.0374832	0.157977	0.801407
1678	AS2_scf7180000695476	791566	A	G	ASIC003486-RA:c.332A>G	ASIC003486:p.Glu111Gly	40	43	93.0233	26	41	63.4146	0.000823174	0.0270637	1.56761
1679	AS2_scf7180000695476	793295	G	A	ASIC003486-RA:c.1142G>A	ASIC003486:p.Gly381Asp	21	46	45.6522	22	42	52.381	0.139002	0.223795	0.650149
1680	AS2_scf7180000695476	793300	G	A	ASIC003486-RA:c.1147G>A	ASIC003486:p.Asp383Asn	15	44	34.0909	21	44	47.7273	0.0748518	0.200834	0.697163
1681	AS2_scf7180000695476	793333	G	C	ASIC003486-RA:c.1180G>C	ASIC003486:p.Val394Leu	34	40	85	44	51	86.2745	0.231781	0.255226	0.593076
1682	AS2_scf7180000695476	796537	A	T	ASIC003486-RA:c.4384A>T	ASIC003486:p.Thr1462Ser	35	58	60.3448	34	46	73.913	0.0587836	0.187859	0.726167
1683	AS2_scf7180000695476	796573	A	C	ASIC003486-RA:c.4420A>C	ASIC003486:p.Met1474Leu	43	49	87.7551	36	47	76.5957	0.0781516	0.203214	0.692046
1684	AS2_scf7180000695476	800660	C	T	ASIC003487-RA:c.2828G>A	ASIC003487:p.Gly943Asp	27	52	51.9231	17	48	35.4167	0.041049	0.164639	0.783466
1685	AS2_scf7180000695476	800924	T	A	ASIC003487-RA:c.2564A>T	ASIC003487:p.Tyr855Phe	49	49	100	42	43	97.6744	0.467391	0.483121	0.315944
1686	AS2_scf7180000695476	801684	A	T	ASIC003487-RA:c.1872T>A	ASIC003487:p.Asp624Glu	20	46	43.4783	24	42	57.1429	0.0755706	0.201275	0.69621
1687	AS2_scf7180000695476	802634	A	T	ASIC003487-RA:c.1235T>A	ASIC003487:p.Leu412Gln	34	43	79.0698	27	46	58.6957	0.0219616	0.127433	0.894717
1688	AS2_scf7180000695476	803492	T	A	ASIC003487-RA:c.377A>T	ASIC003487:p.Tyr126Phe	45	53	84.9057	46	52	88.4615	0.19667	0.225057	0.647707
1689	AS2_scf7180000695476	863784	T	C	ASIC003490-RA:c.1672A>G	ASIC003490:p.Met558Val	45	56	80.3571	37	46	80.4348	0.197332	0.225656	0.646553
1690	AS2_scf7180000695476	869789	T	A	ASIC003492-RA:c.1002T>A	ASIC003492:p.Asp334Glu	16	43	37.2093	22	42	52.381	0.0654209	0.193585	0.713128
1691	AS2_scf7180000695476	869798	A	T	ASIC003492-RA:c.1011A>T	ASIC003492:p.Gln337His	17	48	35.4167	21	48	43.75	0.117415	0.220777	0.656046
1692	AS2_scf7180000695476	885935	C	A	ASIC003495-RA:c.200G>T	ASIC003495:p.Trp67Leu	32	40	80	25	43	58.1395	0.0193808	0.121056	0.917015
1693	AS2_scf7180000695476	886740	T	A	ASIC003497-RA:c.1601A>T	ASIC003497:p.His534Leu	40	56	71.4286	40	49	81.6327	0.0878394	0.209257	0.67932
1694	AS2_scf7180000695476	887393	A	T	ASIC003497-RA:c.948T>A	ASIC003497:p.Asp316Glu	18	50	36	15	40	37.5	0.172011	0.2095	0.678816
1695	AS2_scf7180000695476	893296	T	C	ASIC003499-RA:c.2026A>G	ASIC003499:p.Thr676Ala	44	44	100	44	47	93.617	0.133473	0.222933	0.651826
1696	AS2_scf7180000695476	920432	G	A	ASIC003500-RA:c.766G>A	ASIC003500:p.Ala256Thr	27	40	67.5	25	49	51.0204	0.0511479	0.180509	0.743501
1697	AS2_scf7180000695476	925953	A	T	ASIC003502-RA:c.1113T>A	ASIC003502:p.Asp371Glu	29	49	59.1837	14	44	31.8182	0.00516352	0.0660187	1.18033
1698	AS2_scf7180000695476	926015	G	C	ASIC003502-RA:c.1051C>G	ASIC003502:p.Pro351Ala	45	52	86.5385	35	48	72.9167	0.048156	0.176191	0.754016
1699	AS2_scf7180000695476	926090	G	A	ASIC003502-RA:c.976C>T	ASIC003502:p.Pro326Ser	31	40	77.5	34	51	66.6667	0.0993675	0.214998	0.667566
1700	AS2_scf7180000695476	927118	T	G	ASIC003502-RA:c.640A>C	ASIC003502:p.Thr214Pro	37	44	84.0909	25	42	59.5238	0.00786496	0.0797725	1.09815
1701	AS2_scf7180000695476	927577	A	C	ASIC003502-RA:c.576T>G	ASIC003502:p.His192Gln	36	40	90	46	46	100	0.0430363	0.167751	0.775334
1702	AS2_scf7180000695476	928014	A	C	ASIC003502-RA:c.139T>G	ASIC003502:p.Ser47Ala	40	42	95.2381	43	43	100	0.241176	0.263636	0.578996
1703	AS2_scf7180000695476	1064760	G	A	ASIC003506-RA:c.6004G>A	ASIC003506:p.Gly2002Ser	22	40	55	23	41	56.0976	0.1759	0.210087	0.677601
1704	AS2_scf7180000695476	1070752	C	G	ASIC003508-RA:c.294G>C	ASIC003508:p.Gln98His	24	50	48	18	46	39.1304	0.112063	0.219269	0.659023
1705	AS2_scf7180000695476	1077531	G	A	ASIC003511-RA:c.863G>A	ASIC003511:p.Ser288Asn	18	47	38.2979	19	42	45.2381	0.137268	0.223135	0.651432
1706	AS2_scf7180000695476	1078218	G	T	ASIC003511-RA:c.1550G>T	ASIC003511:p.Gly517Val	29	44	65.9091	13	42	30.9524	0.000904474	0.0283668	1.54719
1707	AS2_scf7180000695476	1078229	T	C	ASIC003511-RA:c.1561T>C	ASIC003511:p.Ser521Pro	29	45	64.4444	12	42	28.5714	0.000624472	0.0237852	1.62369
1708	AS2_scf7180000695476	1078946	A	G	ASIC003511-RA:c.2278A>G	ASIC003511:p.Thr760Ala	31	44	70.4545	37	46	80.4348	0.107314	0.218234	0.661078
1709	AS2_scf7180000695476	1081174	G	T	ASIC003512-RA:c.2904C>A	ASIC003512:p.His968Gln	21	47	44.6809	22	46	47.8261	0.157317	0.218325	0.660896
1710	AS2_scf7180000695476	1081395	C	T	ASIC003512-RA:c.2683G>A	ASIC003512:p.Val895Met	24	46	52.1739	26	45	57.7778	0.144785	0.222683	0.652314
1711	AS2_scf7180000695476	1082472	T	C	ASIC003512-RA:c.1606A>G	ASIC003512:p.Thr536Ala	19	52	36.5385	15	42	35.7143	0.170227	0.210369	0.677018
1712	AS2_scf7180000695476	1082702	A	T	ASIC003512-RA:c.1376T>A	ASIC003512:p.Phe459Tyr	17	46	36.9565	17	46	36.9565	0.170803	0.210097	0.677581
1713	AS2_scf7180000695476	1082835	T	C	ASIC003512-RA:c.1243A>G	ASIC003512:p.Thr415Ala	24	61	39.3443	13	42	30.9524	0.114755	0.219565	0.658436
1714	AS2_scf7180000695476	1084837	G	A	ASIC003513-RA:c.190G>A	ASIC003513:p.Val64Ile	26	51	50.9804	26	56	46.4286	0.137602	0.223101	0.651498
1715	AS2_scf7180000695476	1084912	A	G	ASIC003513-RA:c.265A>G	ASIC003513:p.Ser89Gly	26	49	53.0612	30	53	56.6038	0.148004	0.221749	0.654139
1716	AS2_scf7180000695476	1085077	G	A	ASIC003513-RA:c.430G>A	ASIC003513:p.Ala144Thr	26	42	61.9048	17	41	41.4634	0.0315342	0.147896	0.830045
1717	AS2_scf7180000695476	1085096	C	A	ASIC003513-RA:c.449C>A	ASIC003513:p.Pro150His	31	41	75.6098	23	42	54.7619	0.0259111	0.136576	0.864624
1718	AS2_scf7180000695476	1085413	T	C	ASIC003513-RA:c.766T>C	ASIC003513:p.Trp256Arg	43	44	97.7273	46	47	97.8723	0.505006	0.513459	0.289494
1719	AS2_scf7180000695476	1085434	G	A	ASIC003513-RA:c.787G>A	ASIC003513:p.Ala263Thr	40	46	86.9565	35	54	64.8148	0.00709311	0.0768068	1.1146
1720	AS2_scf7180000695476	1085437	A	G	ASIC003513-RA:c.790A>G	ASIC003513:p.Thr264Ala	39	45	86.6667	36	53	67.9245	0.0179041	0.117491	0.929995
1721	AS2_scf7180000695478	83051	C	A	ASIC003632-RA:c.3730G>T	ASIC003632:p.Ala1244Ser	42	43	97.6744	55	55	100	0.438776	0.45553	0.341483
1722	AS2_scf7180000695478	83568	G	T	ASIC003632-RA:c.3327C>A	ASIC003632:p.Asp1109Glu	25	45	55.5556	24	42	57.1429	0.16923	0.210732	0.67627
1723	AS2_scf7180000695478	86024	A	T	ASIC003632-RA:c.871T>A	ASIC003632:p.Cys291Ser	46	47	97.8723	46	47	97.8723	0.505376	0.513165	0.289743
1724	AS2_scf7180000695478	109749	T	C	ASIC003634-RA:c.223T>C	ASIC003634:p.Ser75Pro	33	43	76.7442	35	53	66.0377	0.0944662	0.213231	0.67115
1725	AS2_scf7180000695478	147149	C	T	ASIC003615-RA:c.239G>A	ASIC003615:p.Cys80Tyr	15	44	34.0909	20	43	46.5116	0.0873271	0.209319	0.679192
1726	AS2_scf7180000695478	170980	T	A	ASIC003616-RA:c.112T>A	ASIC003616:p.Leu38Met	18	42	42.8571	17	46	36.9565	0.147383	0.221876	0.65389
1727	AS2_scf7180000695478	180728	T	C	ASIC003617-RA:c.142T>C	ASIC003617:p.Ser48Pro	18	43	41.8605	20	42	47.619	0.150083	0.221232	0.655152
1728	AS2_scf7180000695478	180864	C	T	ASIC003617-RA:c.278C>T	ASIC003617:p.Thr93Met	25	42	59.5238	12	43	27.907	0.00236916	0.0448576	1.34816
1729	AS2_scf7180000695478	203395	A	G	ASIC003617-RA:c.1183A>G	ASIC003617:p.Ile395Val	42	48	87.5	32	40	80	0.146726	0.222196	0.653263
1730	AS2_scf7180000695478	203971	A	G	ASIC003617-RA:c.1759A>G	ASIC003617:p.Thr587Ala	22	48	45.8333	17	50	34	0.0809253	0.205361	0.687482
1731	AS2_scf7180000695478	206386	A	G	ASIC003617-RA:c.4174A>G	ASIC003617:p.Thr1392Ala	36	40	90	37	42	88.0952	0.265286	0.285238	0.544792
1732	AS2_scf7180000695478	232452	G	T	ASIC003620-RA:c.157C>A	ASIC003620:p.Pro53Thr	24	41	58.5366	27	53	50.9434	0.127172	0.222674	0.65233
1733	AS2_scf7180000695479	39240	C	A	ASIC003639-RA:c.535G>T	ASIC003639:p.Val179Leu	35	43	81.3953	22	48	45.8333	0.000351437	0.0181724	1.74059
1734	AS2_scf7180000695481	33359	C	A	ASIC003653-RA:c.193C>A	ASIC003653:p.Pro65Thr	39	43	90.6977	36	41	87.8049	0.25122	0.272662	0.564375
1735	AS2_scf7180000695481	65718	T	C	ASIC003656-RA:c.301T>C	ASIC003656:p.Ser101Pro	27	41	65.8537	31	46	67.3913	0.177818	0.21099	0.675738
1736	AS2_scf7180000695481	65914	T	C	ASIC003656-RA:c.497T>C	ASIC003656:p.Leu166Pro	40	40	100	44	45	97.7778	0.529412	0.532442	0.273728
1737	AS2_scf7180000695481	65932	C	A	ASIC003656-RA:c.515C>A	ASIC003656:p.Ser172Tyr	39	47	82.9787	36	51	70.5882	0.0682197	0.195563	0.708713
1738	AS2_scf7180000695481	82867	A	C	ASIC003657-RA:c.256A>C	ASIC003657:p.Ile86Leu	50	53	94.3396	31	42	73.8095	0.00490592	0.0645433	1.19015
1739	AS2_scf7180000695481	113940	G	T	ASIC003645-RA:c.623C>A	ASIC003645:p.Ala208Glu	42	44	95.4545	45	47	95.7447	0.382623	0.399748	0.398213
1740	AS2_scf7180000695481	146758	T	C	ASIC003650-RA:c.137T>C	ASIC003650:p.Phe46Ser	21	44	47.7273	16	49	32.6531	0.0570057	0.18596	0.730581
1741	AS2_scf7180000695482	4930	G	C	ASIC003660-RA:c.473G>C	ASIC003660:p.Arg158Thr	28	41	68.2927	28	44	63.6364	0.163852	0.21417	0.669241
1742	AS2_scf7180000695482	4947	G	A	ASIC003660-RA:c.490G>A	ASIC003660:p.Asp164Asn	30	43	69.7674	31	47	65.9574	0.166089	0.212604	0.672429
1743	AS2_scf7180000695482	4968	C	G	ASIC003660-RA:c.511C>G	ASIC003660:p.Gln171Glu	29	41	70.7317	30	45	66.6667	0.169789	0.210609	0.676522
1744	AS2_scf7180000695482	5029	C	T	ASIC003660-RA:c.572C>T	ASIC003660:p.Ala191Val	36	47	76.5957	28	40	70	0.151438	0.220701	0.656196
1745	AS2_scf7180000695482	68058	A	G	ASIC003674-RA:c.2T>C	ASIC003674:p.Met1?	40	42	95.2381	38	40	95	0.383966	0.400741	0.397136
1746	AS2_scf7180000695482	136723	A	C	ASIC003661-RA:c.247T>G	ASIC003661:p.Trp83Gly	45	46	97.8261	43	43	100	0.516854	0.521771	0.28252
1747	AS2_scf7180000695482	192207	C	T	ASIC003670-RA:c.371G>A	ASIC003670:p.Arg124Gln	24	47	51.0638	15	45	33.3333	0.038982	0.161625	0.79149
1748	AS2_scf7180000695482	192247	G	A	ASIC003670-RA:c.331C>T	ASIC003670:p.His111Tyr	10	50	20	25	49	51.0204	0.00091215	0.0284981	1.54518
1749	AS2_scf7180000695483	1472	T	A	ASIC003679-RA:c.1052T>A	ASIC003679:p.Leu351Gln	36	41	87.8049	39	44	88.6364	0.260086	0.280645	0.551842
1750	AS2_scf7180000695483	3888	T	G	ASIC003679-RA:c.3178T>G	ASIC003679:p.Phe1060Val	42	44	95.4545	39	48	81.25	0.0295158	0.143967	0.841737
1751	AS2_scf7180000695483	4638	C	G	ASIC003679-RA:c.3928C>G	ASIC003679:p.Leu1310Val	8	40	20	23	45	51.1111	0.00213324	0.0429276	1.36726
1752	AS2_scf7180000695483	24660	G	C	ASIC003762-RA:c.169G>C	ASIC003762:p.Ala57Pro	27	44	61.3636	24	42	57.1429	0.160604	0.216185	0.665175
1753	AS2_scf7180000695483	58530	T	C	ASIC003691-RA:c.331T>C	ASIC003691:p.Ser111Pro	33	42	78.5714	23	40	57.5	0.0238656	0.132596	0.87747
1754	AS2_scf7180000695483	68098	G	C	ASIC003724-RA:c.8321C>G	ASIC003724:p.Thr2774Ser	25	56	44.6429	21	42	50	0.141267	0.223392	0.650933
1755	AS2_scf7180000695483	72952	G	T	ASIC003724-RA:c.4531C>A	ASIC003724:p.Pro1511Thr	17	40	42.5	24	44	54.5455	0.095289	0.213495	0.670611
1756	AS2_scf7180000695483	72970	A	C	ASIC003724-RA:c.4513T>G	ASIC003724:p.Leu1505Val	32	42	76.1905	32	43	74.4186	0.194769	0.223492	0.650737
1757	AS2_scf7180000695483	85767	A	G	ASIC003737-RA:c.1123A>G	ASIC003737:p.Ile375Val	34	42	80.9524	34	44	77.2727	0.191939	0.221317	0.654986
1758	AS2_scf7180000695483	88045	C	T	ASIC003738-RA:c.937G>A	ASIC003738:p.Ala313Thr	24	40	60	20	51	39.2157	0.0247804	0.13421	0.872215
1759	AS2_scf7180000695483	103086	A	G	ASIC003743-RA:c.349A>G	ASIC003743:p.Asn117Asp	32	47	68.0851	26	40	65	0.17199	0.209522	0.67877
1760	AS2_scf7180000695483	118833	A	C	ASIC003747-RA:c.842T>G	ASIC003747:p.Ile281Ser	22	40	55	26	49	53.0612	0.166408	0.21238	0.672886
1761	AS2_scf7180000695483	119034	T	C	ASIC003747-RA:c.641A>G	ASIC003747:p.Asn214Ser	50	54	92.5926	40	43	93.0233	0.303813	0.321918	0.492254
1762	AS2_scf7180000695483	128706	A	G	ASIC003748-RA:c.229A>G	ASIC003748:p.Thr77Ala	21	56	37.5	19	46	41.3043	0.149417	0.221429	0.654765
1763	AS2_scf7180000695483	128770	G	C	ASIC003748-RA:c.293G>C	ASIC003748:p.Arg98Thr	20	51	39.2157	29	48	60.4167	0.0177399	0.116883	0.93225
1764	AS2_scf7180000695483	148197	G	A	ASIC003750-RA:c.2269G>A	ASIC003750:p.Val757Ile	36	41	87.8049	26	43	60.4651	0.00336861	0.0535438	1.27129
1765	AS2_scf7180000695483	158624	G	T	ASIC003754-RA:c.2703G>T	ASIC003754:p.Gln901His	24	57	42.1053	17	43	39.5349	0.157493	0.218087	0.66137
1766	AS2_scf7180000695483	161870	T	C	ASIC003756-RA:c.371A>G	ASIC003756:p.*124Trp	22	41	53.6585	39	58	67.2414	0.0659297	0.193723	0.71282
1767	AS2_scf7180000695483	161874	C	A	ASIC003756-RA:c.367G>T	ASIC003756:p.Gly123Trp	35	41	85.3659	45	59	76.2712	0.111562	0.219365	0.658833
1768	AS2_scf7180000695483	161993	A	G	ASIC003756-RA:c.248T>C	ASIC003756:p.Val83Ala	16	41	39.0244	18	49	36.7347	0.168269	0.211241	0.675222
1769	AS2_scf7180000695483	180436	C	T	ASIC003760-RA:c.116C>T	ASIC003760:p.Thr39Ile	28	50	56	30	45	66.6667	0.0958581	0.213628	0.670342
1770	AS2_scf7180000695483	191405	G	A	ASIC003764-RA:c.1783C>T	ASIC003764:p.Leu595Phe	23	46	50	24	53	45.283	0.143408	0.222936	0.651819
1771	AS2_scf7180000695483	192201	C	T	ASIC003764-RA:c.1057G>A	ASIC003764:p.Gly353Ser	36	48	75	37	43	86.0465	0.0899076	0.210471	0.676807
1772	AS2_scf7180000695483	193149	C	A	ASIC003764-RA:c.175G>T	ASIC003764:p.Ala59Ser	31	51	60.7843	28	41	68.2927	0.132267	0.222877	0.651935
1773	AS2_scf7180000695483	194119	T	C	ASIC003765-RA:c.359T>C	ASIC003765:p.Val120Ala	43	46	93.4783	44	48	91.6667	0.288566	0.306997	0.512866
1774	AS2_scf7180000695483	194891	A	G	ASIC003765-RA:c.1060A>G	ASIC003765:p.Thr354Ala	32	40	80	48	51	94.1176	0.0338411	0.152248	0.81745
1775	AS2_scf7180000695483	195216	A	C	ASIC003765-RA:c.1385A>C	ASIC003765:p.Asp462Ala	38	45	84.4444	32	40	80	0.194051	0.22295	0.651793
1776	AS2_scf7180000695483	195830	T	C	ASIC003765-RA:c.1999T>C	ASIC003765:p.Tyr667His	37	44	84.0909	41	45	91.1111	0.156342	0.2187	0.660151
1777	AS2_scf7180000695483	196565	G	A	ASIC003765-RA:c.2734G>A	ASIC003765:p.Glu912Lys	17	43	39.5349	14	45	31.1111	0.126271	0.22243	0.652806
1778	AS2_scf7180000695483	204907	A	C	ASIC003765-RA:c.10882A>C	ASIC003765:p.Met3628Leu	31	45	68.8889	32	51	62.7451	0.140382	0.223812	0.650117
1779	AS2_scf7180000695483	248271	G	T	ASIC003775-RA:c.1883G>T	ASIC003775:p.Ser628Ile	19	50	38	17	46	36.9565	0.166058	0.212698	0.672236
1780	AS2_scf7180000695483	251343	A	T	ASIC003776-RA:c.936A>T	ASIC003776:p.Glu312Asp	26	44	59.0909	34	46	73.913	0.0595123	0.188638	0.72437
1781	AS2_scf7180000695483	254124	T	G	ASIC003777-RA:c.1651A>C	ASIC003777:p.Lys551Gln	44	52	84.6154	26	41	63.4146	0.0127788	0.100629	0.997276
1782	AS2_scf7180000695483	336520	G	A	ASIC003783-RA:c.244G>A	ASIC003783:p.Gly82Ser	15	42	35.7143	18	47	38.2979	0.168595	0.211261	0.675181
1783	AS2_scf7180000695483	348701	G	A	ASIC003786-RA:c.107G>A	ASIC003786:p.Ser36Asn	43	45	95.5556	31	40	77.5	0.0126882	0.100254	0.9989
1784	AS2_scf7180000695483	353588	A	T	ASIC003788-RA:c.364T>A	ASIC003788:p.Ser122Thr	39	49	79.5918	30	46	65.2174	0.0544344	0.184191	0.734732
1785	AS2_scf7180000695483	354726	T	G	ASIC003789-RA:c.237A>C	ASIC003789:p.Glu79Asp	45	53	84.9057	35	46	76.087	0.110304	0.21932	0.658922
1786	AS2_scf7180000695483	356860	A	T	ASIC003791-RA:c.280T>A	ASIC003791:p.Ser94Thr	20	42	47.619	42	43	97.6744	6.38033e-08	0.000260637	3.58396
1787	AS2_scf7180000695483	356940	G	C	ASIC003791-RA:c.200C>G	ASIC003791:p.Ala67Gly	21	51	41.1765	13	42	30.9524	0.103381	0.217127	0.663287
1788	AS2_scf7180000695483	358636	G	A	ASIC003792-RA:c.208G>A	ASIC003792:p.Ala70Thr	17	44	38.6364	20	48	41.6667	0.161378	0.215999	0.665549
1789	AS2_scf7180000695483	367147	T	G	ASIC003793-RA:c.155T>G	ASIC003793:p.Ile52Ser	25	47	53.1915	29	42	69.0476	0.054698	0.184586	0.733801
1790	AS2_scf7180000695483	367173	C	G	ASIC003793-RA:c.181C>G	ASIC003793:p.Pro61Ala	12	45	26.6667	21	43	48.8372	0.0179841	0.11778	0.92893
1791	AS2_scf7180000695483	376542	G	A	ASIC003794-RA:c.130G>A	ASIC003794:p.Ala44Thr	18	41	43.9024	19	52	36.5385	0.130563	0.222391	0.652883
1792	AS2_scf7180000695483	377973	G	A	ASIC003794-RA:c.1561G>A	ASIC003794:p.Asp521Asn	21	43	48.8372	26	51	50.9804	0.160463	0.216334	0.664875
1793	AS2_scf7180000695483	378567	T	A	ASIC003794-RA:c.2155T>A	ASIC003794:p.Tyr719Asn	23	40	57.5	22	52	42.3077	0.059706	0.188776	0.724052
1794	AS2_scf7180000695483	379573	G	A	ASIC003794-RA:c.3161G>A	ASIC003794:p.Arg1054Gln	19	42	45.2381	22	49	44.898	0.167098	0.211986	0.673693
1795	AS2_scf7180000695483	380621	G	C	ASIC003794-RA:c.3635G>C	ASIC003794:p.Ser1212Thr	22	47	46.8085	31	49	63.2653	0.0446373	0.170574	0.768088
1796	AS2_scf7180000695483	391973	T	C	ASIC003796-RA:c.2371T>C	ASIC003796:p.Ser791Pro	20	44	45.4545	15	48	31.25	0.0648192	0.193734	0.712793
1797	AS2_scf7180000695483	392409	T	C	ASIC003796-RA:c.2807T>C	ASIC003796:p.Val936Ala	25	46	54.3478	23	41	56.0976	0.168596	0.211246	0.675212
1798	AS2_scf7180000695483	392420	G	A	ASIC003796-RA:c.2818G>A	ASIC003796:p.Ala940Thr	22	42	52.381	28	45	62.2222	0.112559	0.219451	0.658663
1799	AS2_scf7180000695483	393663	A	C	ASIC003796-RA:c.4061A>C	ASIC003796:p.Asn1354Thr	40	54	74.0741	34	49	69.3878	0.151019	0.220898	0.655808
1800	AS2_scf7180000695483	394772	C	A	ASIC003796-RA:c.5170C>A	ASIC003796:p.Pro1724Thr	27	41	65.8537	22	49	44.898	0.0239878	0.132823	0.876726
1801	AS2_scf7180000695483	423979	C	G	ASIC003802-RA:c.3422G>C	ASIC003802:p.Cys1141Ser	30	47	63.8298	31	57	54.386	0.0997464	0.215134	0.667291
1802	AS2_scf7180000695483	461450	C	G	ASIC003803-RA:c.4107C>G	ASIC003803:p.Asp1369Glu	33	40	82.5	37	41	90.2439	0.155725	0.218829	0.659895
1803	AS2_scf7180000695483	559903	A	C	ASIC003822-RA:c.241T>G	ASIC003822:p.Ser81Ala	40	46	86.9565	38	48	79.1667	0.133497	0.222859	0.65197
1804	AS2_scf7180000695483	573291	A	G	ASIC003824-RA:c.10A>G	ASIC003824:p.Lys4Glu	33	51	64.7059	27	43	62.7907	0.167158	0.211848	0.673976
1805	AS2_scf7180000695483	593395	T	C	ASIC003684-RA:c.4T>C	ASIC003684:p.Phe2Leu	36	40	90	26	40	65	0.00597071	0.0701376	1.15405
1806	AS2_scf7180000695483	595518	G	A	ASIC003685-RA:c.1309C>T	ASIC003685:p.Leu437Phe	21	40	52.5	29	42	69.0476	0.0564008	0.185431	0.731819
1807	AS2_scf7180000695483	603587	A	T	ASIC003687-RA:c.497T>A	ASIC003687:p.Leu166His	34	46	73.913	38	44	86.3636	0.0724796	0.19938	0.700319
1808	AS2_scf7180000695483	646852	C	T	ASIC003694-RA:c.1414G>A	ASIC003694:p.Ala472Thr	16	50	32	20	42	47.619	0.0537919	0.18396	0.735278
1809	AS2_scf7180000695483	669409	G	T	ASIC003699-RA:c.896C>A	ASIC003699:p.Thr299Asn	22	43	51.1628	24	49	48.9796	0.161869	0.21565	0.666251
1810	AS2_scf7180000695483	677990	C	T	ASIC003703-RA:c.224G>A	ASIC003703:p.Gly75Glu	30	63	47.619	23	40	57.5	0.100279	0.215458	0.666637
1811	AS2_scf7180000695483	687681	G	T	ASIC003704-RA:c.36C>A	ASIC003704:p.Asp12Glu	46	46	100	33	42	78.5714	0.000780417	0.0268464	1.57111
1812	AS2_scf7180000695483	723552	G	T	ASIC003706-RA:c.863G>T	ASIC003706:p.Ser288Ile	21	41	51.2195	23	44	52.2727	0.170981	0.21003	0.677718
1813	AS2_scf7180000695483	813487	C	G	ASIC003715-RA:c.6179G>C	ASIC003715:p.Ser2060Thr	47	51	92.1569	31	45	68.8889	0.0030488	0.050886	1.2934
1814	AS2_scf7180000695483	816365	C	G	ASIC003715-RA:c.3446G>C	ASIC003715:p.Gly1149Ala	44	48	91.6667	53	57	92.9825	0.275667	0.294809	0.530459
1815	AS2_scf7180000695483	816373	T	C	ASIC003715-RA:c.3438A>G	ASIC003715:p.Ile1146Met	41	46	89.1304	54	58	93.1034	0.211674	0.237863	0.623674
1816	AS2_scf7180000695483	817895	G	T	ASIC003715-RA:c.1916C>A	ASIC003715:p.Pro639Gln	18	40	45	28	40	70	0.0143784	0.10655	0.972445
1817	AS2_scf7180000695483	820885	T	C	ASIC003715-RA:c.743A>G	ASIC003715:p.Glu248Gly	39	49	79.5918	32	44	72.7273	0.143228	0.222955	0.651784
1818	AS2_scf7180000695483	832241	T	G	ASIC003716-RA:c.187T>G	ASIC003716:p.Ser63Ala	17	55	30.9091	29	50	58	0.00324259	0.0527203	1.27802
1819	AS2_scf7180000695483	852067	C	A	ASIC003722-RA:c.972C>A	ASIC003722:p.Asp324Glu	38	56	67.8571	46	57	80.7018	0.0514531	0.180883	0.742603
1820	AS2_scf7180000695483	853855	T	G	ASIC003723-RA:c.1373A>C	ASIC003723:p.Glu458Ala	31	47	65.9574	27	49	55.102	0.0926196	0.212497	0.672647
1821	AS2_scf7180000695483	858408	T	G	ASIC003725-RA:c.2641T>G	ASIC003725:p.Ser881Ala	36	50	72	28	41	68.2927	0.168874	0.210898	0.675927
1822	AS2_scf7180000695483	865164	T	C	ASIC003727-RA:c.2440A>G	ASIC003727:p.Thr814Ala	31	40	77.5	36	46	78.2609	0.204115	0.231276	0.635869
1823	AS2_scf7180000695484	2846	A	C	ASIC003828-RA:c.232A>C	ASIC003828:p.Met78Leu	40	42	95.2381	41	45	91.1111	0.254038	0.275155	0.560423
1824	AS2_scf7180000695484	2933	A	G	ASIC003828-RA:c.319A>G	ASIC003828:p.Thr107Ala	40	41	97.561	53	53	100	0.43617	0.452912	0.343986
1825	AS2_scf7180000695484	2979	C	A	ASIC003828-RA:c.365C>A	ASIC003828:p.Thr122Asn	46	46	100	36	41	87.8049	0.0202815	0.123564	0.908107
1826	AS2_scf7180000695484	3356	A	C	ASIC003828-RA:c.742A>C	ASIC003828:p.Ser248Arg	18	41	43.9024	22	41	53.6585	0.11925	0.2214	0.654822
1827	AS2_scf7180000695484	3360	T	C	ASIC003828-RA:c.746T>C	ASIC003828:p.Ile249Thr	14	42	33.3333	20	41	48.7805	0.0647522	0.193853	0.712527
1828	AS2_scf7180000695484	3896	A	G	ASIC003828-RA:c.1282A>G	ASIC003828:p.Thr428Ala	34	54	62.963	33	41	80.4878	0.0330554	0.150536	0.822358
1829	AS2_scf7180000695484	3910	G	T	ASIC003828-RA:c.1296G>T	ASIC003828:p.Gln432His	51	54	94.4444	38	42	90.4762	0.232928	0.256247	0.591341
1830	AS2_scf7180000695484	3996	C	G	ASIC003828-RA:c.1382C>G	ASIC003828:p.Ala461Gly	26	53	49.0566	20	45	44.4444	0.145283	0.22261	0.652454
1831	AS2_scf7180000695484	92908	T	C	ASIC003837-RA:c.673A>G	ASIC003837:p.Thr225Ala	40	43	93.0233	41	46	89.1304	0.239524	0.26211	0.581516
1832	AS2_scf7180000695484	92910	A	G	ASIC003837-RA:c.671T>C	ASIC003837:p.Phe224Ser	36	43	83.7209	38	47	80.8511	0.20455	0.231689	0.635095
1833	AS2_scf7180000695484	143152	G	A	ASIC003840-RA:c.1123G>A	ASIC003840:p.Ala375Thr	17	45	37.7778	26	55	47.2727	0.103041	0.217027	0.663486
1834	AS2_scf7180000695484	149021	G	T	ASIC003841-RA:c.565G>T	ASIC003841:p.Ala189Ser	29	54	53.7037	31	53	58.4906	0.136596	0.223466	0.650789
1835	AS2_scf7180000695484	149033	C	T	ASIC003841-RA:c.577C>T	ASIC003841:p.Arg193Cys	38	55	69.0909	31	45	68.8889	0.171711	0.209588	0.678633
1836	AS2_scf7180000695484	180554	C	G	ASIC003829-RA:c.1436G>C	ASIC003829:p.Arg479Pro	24	64	37.5	16	42	38.0952	0.161709	0.215682	0.666185
1837	AS2_scf7180000695484	196771	G	C	ASIC003830-RA:c.259C>G	ASIC003830:p.Pro87Ala	40	45	88.8889	38	46	82.6087	0.166275	0.212543	0.672553
1838	AS2_scf7180000695484	217315	T	A	ASIC003832-RA:c.30T>A	ASIC003832:p.His10Gln	39	49	79.5918	47	47	100	0.000728535	0.0259352	1.58611
1839	AS2_scf7180000695484	247837	A	T	ASIC003834-RA:c.218T>A	ASIC003834:p.Leu73Gln	35	41	85.3659	26	43	60.4651	0.00749787	0.0781846	1.10688
1840	AS2_scf7180000695484	248232	G	T	ASIC003834-RA:c.158C>A	ASIC003834:p.Pro53Gln	40	40	100	43	44	97.7273	0.52381	0.527522	0.277759
1841	AS2_scf7180000695484	248337	T	G	ASIC003834-RA:c.53A>C	ASIC003834:p.Gln18Pro	28	44	63.6364	24	46	52.1739	0.0933618	0.212885	0.671855
1842	AS2_scf7180000695484	248355	G	A	ASIC003834-RA:c.35C>T	ASIC003834:p.Pro12Leu	26	45	57.7778	27	43	62.7907	0.153991	0.219584	0.658399
1843	AS2_scf7180000695484	248365	A	G	ASIC003834-RA:c.25T>C	ASIC003834:p.Ser9Pro	36	46	78.2609	32	49	65.3061	0.0692592	0.196577	0.706467
1844	AS2_scf7180000695485	5489	T	C	ASIC003855-RA:c.4547A>G	ASIC003855:p.Asn1516Ser	22	43	51.1628	11	41	26.8293	0.0135082	0.103238	0.98616
1845	AS2_scf7180000695485	6312	G	T	ASIC003855-RA:c.3724C>A	ASIC003855:p.Leu1242Met	34	45	75.5556	37	48	77.0833	0.189535	0.219241	0.659077
1846	AS2_scf7180000695485	139004	T	G	ASIC003849-RA:c.69A>C	ASIC003849:p.Leu23Phe	29	40	72.5	24	40	60	0.0945039	0.213169	0.671277
1847	AS2_scf7180000695485	153046	C	T	ASIC003851-RA:c.46C>T	ASIC003851:p.Gln16*	17	47	36.1702	21	46	45.6522	0.109263	0.218686	0.660179
1848	AS2_scf7180000695485	184665	C	A	ASIC003852-RA:c.461G>T	ASIC003852:p.Arg154Leu	32	40	80	44	48	91.6667	0.0728635	0.199262	0.700576
1849	AS2_scf7180000695485	184696	A	C	ASIC003852-RA:c.430T>G	ASIC003852:p.Phe144Val	41	43	95.3488	55	59	93.2203	0.305209	0.323167	0.490573
1850	AS2_scf7180000695485	270704	A	G	ASIC003857-RA:c.988A>G	ASIC003857:p.Asn330Asp	31	42	73.8095	19	41	46.3415	0.0070101	0.0764143	1.11683
1851	AS2_scf7180000695485	279085	C	A	ASIC003858-RA:c.1465G>T	ASIC003858:p.Ala489Ser	34	48	70.8333	37	49	75.5102	0.158674	0.217147	0.663245
1852	AS2_scf7180000695485	283044	T	C	ASIC003859-RA:c.430A>G	ASIC003859:p.Arg144Gly	35	46	76.087	37	45	82.2222	0.158434	0.217383	0.662774
1853	AS2_scf7180000695485	283049	A	G	ASIC003859-RA:c.425T>C	ASIC003859:p.Leu142Ser	18	48	37.5	24	47	51.0638	0.0685296	0.19597	0.70781
1854	AS2_scf7180000695485	283421	C	G	ASIC003859-RA:c.53G>C	ASIC003859:p.Arg18Pro	20	43	46.5116	24	47	51.0638	0.152485	0.220302	0.656982
1855	AS2_scf7180000695485	283441	C	T	ASIC003859-RA:c.33G>A	ASIC003859:p.Met11Ile	20	40	50	11	43	25.5814	0.0133285	0.102681	0.988508
1856	AS2_scf7180000695485	285527	A	T	ASIC003860-RA:c.2612T>A	ASIC003860:p.Ile871Lys	42	46	91.3043	45	45	100	0.0610569	0.19065	0.719764
1857	AS2_scf7180000695485	288547	C	T	ASIC003860-RA:c.46G>A	ASIC003860:p.Val16Ile	17	47	36.1702	20	47	42.5532	0.137279	0.223131	0.65144
1858	AS2_scf7180000695485	290963	A	T	ASIC003861-RA:c.1779T>A	ASIC003861:p.Asp593Glu	20	44	45.4545	24	52	46.1538	0.162348	0.215497	0.666558
1859	AS2_scf7180000695485	291005	A	C	ASIC003861-RA:c.1737T>G	ASIC003861:p.His579Gln	17	43	39.5349	33	49	67.3469	0.00484448	0.0643044	1.19176
1860	AS2_scf7180000695485	306178	C	G	ASIC003863-RA:c.189C>G	ASIC003863:p.Phe63Leu	20	45	44.4444	34	54	62.963	0.0301437	0.145209	0.838007
1861	AS2_scf7180000695485	326041	A	G	ASIC003869-RA:c.637A>G	ASIC003869:p.Lys213Glu	27	44	61.3636	31	41	75.6098	0.0699107	0.1975	0.704433
1862	AS2_scf7180000695485	326043	G	C	ASIC003869-RA:c.639G>C	ASIC003869:p.Lys213Asn	27	44	61.3636	31	41	75.6098	0.0699107	0.197466	0.704508
1863	AS2_scf7180000695485	326053	T	A	ASIC003869-RA:c.649T>A	ASIC003869:p.Ser217Thr	28	46	60.8696	34	45	75.5556	0.0588894	0.18794	0.725981
1864	AS2_scf7180000695485	326097	C	G	ASIC003869-RA:c.693C>G	ASIC003869:p.His231Gln	32	53	60.3774	29	42	69.0476	0.117717	0.221014	0.655579
1865	AS2_scf7180000695485	328075	G	A	ASIC003870-RA:c.587G>A	ASIC003870:p.Ser196Asn	27	45	60	11	51	21.5686	0.00010131	0.0107494	1.96861
1866	AS2_scf7180000695487	7925	T	C	ASIC003879-RA:c.34A>G	ASIC003879:p.Ile12Val	28	55	50.9091	26	64	40.625	0.0785724	0.203402	0.691645
1867	AS2_scf7180000695489	11523	T	C	ASIC003881-RA:c.674A>G	ASIC003881:p.Lys225Arg	34	43	79.0698	31	43	72.093	0.150446	0.221088	0.655434
1868	AS2_scf7180000695489	92264	C	T	ASIC003894-RA:c.1586C>T	ASIC003894:p.Ala529Val	25	50	50	16	43	37.2093	0.0781911	0.203155	0.692172
1869	AS2_scf7180000695489	106451	C	T	ASIC003882-RA:c.2404G>A	ASIC003882:p.Gly802Ser	42	44	95.4545	39	41	95.122	0.383112	0.40008	0.397853
1870	AS2_scf7180000695489	183910	T	A	ASIC003888-RA:c.561A>T	ASIC003888:p.Glu187Asp	15	42	35.7143	19	41	46.3415	0.109882	0.218881	0.659792
1871	AS2_scf7180000695490	40908	C	G	ASIC003900-RA:c.331C>G	ASIC003900:p.Arg111Gly	18	43	41.8605	25	42	59.5238	0.0466816	0.173753	0.760066
1872	AS2_scf7180000695491	12713	A	G	ASIC003928-RA:c.43T>C	ASIC003928:p.Cys15Arg	42	43	97.6744	50	51	98.0392	0.501716	0.511578	0.291088
1873	AS2_scf7180000695491	28861	C	T	ASIC003961-RA:c.227C>T	ASIC003961:p.Thr76Met	31	54	57.4074	28	50	56	0.155242	0.219168	0.659222
1874	AS2_scf7180000695491	104124	G	A	ASIC003912-RA:c.1963G>A	ASIC003912:p.Ala655Thr	33	46	71.7391	30	46	65.2174	0.142202	0.223185	0.651336
1875	AS2_scf7180000695491	104130	A	G	ASIC003912-RA:c.1969A>G	ASIC003912:p.Thr657Ala	34	44	77.2727	38	48	79.1667	0.19438	0.22325	0.651209
1876	AS2_scf7180000695491	120697	T	G	ASIC003913-RA:c.606T>G	ASIC003913:p.Asp202Glu	42	50	84	35	51	68.6275	0.03681	0.156716	0.804887
1877	AS2_scf7180000695491	128928	T	C	ASIC003914-RA:c.1A>G	ASIC003914:p.Met1?	30	43	69.7674	35	45	77.7778	0.134136	0.223195	0.651316
1878	AS2_scf7180000695491	137061	A	G	ASIC003918-RA:c.10A>G	ASIC003918:p.Arg4Gly	47	59	79.661	50	57	87.7193	0.10207	0.216403	0.664737
1879	AS2_scf7180000695491	137098	C	G	ASIC003918-RA:c.47C>G	ASIC003918:p.Pro16Arg	33	43	76.7442	38	51	74.5098	0.184639	0.215531	0.66649
1880	AS2_scf7180000695491	142861	C	G	ASIC003920-RA:c.344G>C	ASIC003920:p.Ser115Thr	37	42	88.0952	26	43	60.4651	0.00283413	0.0495291	1.30514
1881	AS2_scf7180000695491	158902	C	G	ASIC003927-RA:c.1093G>C	ASIC003927:p.Val365Leu	46	49	93.8776	47	47	100	0.128947	0.222563	0.652548
1882	AS2_scf7180000695491	197085	C	A	ASIC003935-RA:c.1839C>A	ASIC003935:p.Asp613Glu	39	44	88.6364	49	50	98	0.0666903	0.194593	0.710873
1883	AS2_scf7180000695491	233742	G	A	ASIC003941-RA:c.301G>A	ASIC003941:p.Val101Ile	26	64	40.625	29	64	45.3125	0.12296	0.221639	0.654354
1884	AS2_scf7180000695491	233745	A	G	ASIC003941-RA:c.304A>G	ASIC003941:p.Thr102Ala	25	64	39.0625	30	64	46.875	0.0956352	0.213627	0.670345
1885	AS2_scf7180000695491	233756	G	T	ASIC003941-RA:c.315G>T	ASIC003941:p.Lys105Asn	26	68	38.2353	28	64	43.75	0.11447	0.219897	0.657781
1886	AS2_scf7180000695491	233775	A	G	ASIC003941-RA:c.334A>G	ASIC003941:p.Asn112Asp	25	67	37.3134	36	67	53.7313	0.0227167	0.129923	0.886312
1887	AS2_scf7180000695491	233778	C	G	ASIC003941-RA:c.337C>G	ASIC003941:p.Gln113Glu	27	68	39.7059	34	66	51.5152	0.0543141	0.184204	0.734702
1888	AS2_scf7180000695491	233782	G	A	ASIC003941-RA:c.341G>A	ASIC003941:p.Gly114Asp	27	66	40.9091	30	71	42.2535	0.135914	0.223356	0.651001
1889	AS2_scf7180000695491	233787	C	T	ASIC003941-RA:c.346C>T	ASIC003941:p.Pro116Ser	28	66	42.4242	33	72	45.8333	0.125716	0.222581	0.652511
1890	AS2_scf7180000695491	233808	G	A	ASIC003941-RA:c.367G>A	ASIC003941:p.Ala123Thr	29	68	42.6471	38	78	48.7179	0.101328	0.215951	0.665644
1891	AS2_scf7180000695491	233841	A	C	ASIC003941-RA:c.400A>C	ASIC003941:p.Lys134Gln	27	71	38.0282	31	70	44.2857	0.102524	0.216636	0.664269
1892	AS2_scf7180000695491	233849	C	A	ASIC003941-RA:c.408C>A	ASIC003941:p.Phe136Leu	26	67	38.806	28	69	40.5797	0.136024	0.22338	0.650956
1893	AS2_scf7180000695491	290087	T	C	ASIC003949-RA:c.2644A>G	ASIC003949:p.Thr882Ala	30	45	66.6667	6	43	13.9535	3.40102e-07	0.000617475	3.20938
1894	AS2_scf7180000695491	327066	A	T	ASIC003955-RA:c.218T>A	ASIC003955:p.Leu73Gln	31	40	77.5	34	45	75.5556	0.197699	0.225933	0.646019
1895	AS2_scf7180000695491	334410	G	T	ASIC003956-RA:c.484C>A	ASIC003956:p.His162Asn	51	56	91.0714	30	47	63.8298	0.000688967	0.0249617	1.60273
1896	AS2_scf7180000695491	362944	G	A	ASIC003957-RA:c.260G>A	ASIC003957:p.Gly87Glu	21	45	46.6667	15	47	31.9149	0.0603111	0.189553	0.72227
1897	AS2_scf7180000695491	415014	T	G	ASIC003962-RA:c.49A>C	ASIC003962:p.Ile17Leu	18	56	32.1429	29	61	47.541	0.0361485	0.156013	0.806838
1898	AS2_scf7180000695491	440492	G	A	ASIC003968-RA:c.323C>T	ASIC003968:p.Ala108Val	17	52	32.6923	24	48	50	0.0351798	0.154195	0.81193
1899	AS2_scf7180000695491	442186	T	C	ASIC003969-RA:c.32T>C	ASIC003969:p.Leu11Pro	16	48	33.3333	24	47	51.0638	0.0364595	0.156242	0.806203
1900	AS2_scf7180000695491	442188	A	C	ASIC003969-RA:c.34A>C	ASIC003969:p.Ile12Leu	16	48	33.3333	24	48	50	0.0425361	0.167077	0.777083
1901	AS2_scf7180000695491	454806	G	A	ASIC003974-RA:c.1159G>A	ASIC003974:p.Gly387Ser	39	55	70.9091	17	44	38.6364	0.000939801	0.0284377	1.54611
1902	AS2_scf7180000695491	456957	G	A	ASIC003974-RA:c.2944G>A	ASIC003974:p.Val982Ile	46	46	100	44	45	97.7778	0.494505	0.506184	0.295691
1903	AS2_scf7180000695491	527998	C	T	ASIC003989-RA:c.166G>A	ASIC003989:p.Asp56Asn	33	46	71.7391	25	49	51.0204	0.020145	0.123054	0.909905
1904	AS2_scf7180000695491	543007	A	G	ASIC003990-RA:c.131A>G	ASIC003990:p.Glu44Gly	43	52	82.6923	34	43	79.0698	0.186688	0.217147	0.663247
1905	AS2_scf7180000695491	543156	A	C	ASIC003990-RA:c.222A>C	ASIC003990:p.Leu74Phe	55	58	94.8276	46	46	100	0.169442	0.210658	0.676422
1906	AS2_scf7180000695491	569473	C	T	ASIC003991-RA:c.127G>A	ASIC003991:p.Ala43Thr	23	46	50	15	44	34.0909	0.0537495	0.184007	0.735165
1907	AS2_scf7180000695491	569475	T	G	ASIC003991-RA:c.125A>C	ASIC003991:p.Lys42Thr	32	44	72.7273	23	43	53.4884	0.0321107	0.14889	0.827134
1908	AS2_scf7180000695491	569479	T	G	ASIC003991-RA:c.121A>C	ASIC003991:p.Asn41His	28	47	59.5745	17	47	36.1702	0.0127912	0.100582	0.997482
1909	AS2_scf7180000695491	597098	A	T	ASIC003995-RA:c.398T>A	ASIC003995:p.Val133Glu	39	48	81.25	42	49	85.7143	0.181655	0.21319	0.671234
1910	AS2_scf7180000695491	597575	T	C	ASIC003995-RA:c.256A>G	ASIC003995:p.Thr86Ala	23	40	57.5	30	47	63.8298	0.145643	0.222536	0.652599
1911	AS2_scf7180000695491	604864	A	G	ASIC003997-RA:c.889A>G	ASIC003997:p.Ile297Val	32	44	72.7273	37	41	90.2439	0.0271453	0.139526	0.855343
1912	AS2_scf7180000695491	677218	C	T	ASIC004003-RA:c.97G>A	ASIC004003:p.Glu33Lys	34	41	82.9268	29	41	70.7317	0.0900932	0.210604	0.676533
1913	AS2_scf7180000695491	713175	A	G	ASIC003907-RA:c.16T>C	ASIC003907:p.Phe6Leu	44	46	95.6522	29	40	72.5	0.00274909	0.0489326	1.3104
1914	AS2_scf7180000695494	47264	A	G	ASIC004011-RA:c.481A>G	ASIC004011:p.Ile161Val	23	44	52.2727	28	50	56	0.153937	0.219642	0.658285
1915	AS2_scf7180000695494	47315	T	A	ASIC004011-RA:c.532T>A	ASIC004011:p.Leu178Met	35	52	67.3077	29	43	67.4419	0.173734	0.209631	0.678545
1916	AS2_scf7180000695494	48823	C	G	ASIC004012-RA:c.216G>C	ASIC004012:p.Glu72Asp	32	48	66.6667	37	51	72.549	0.141769	0.223127	0.651448
1917	AS2_scf7180000695495	2415	T	C	ASIC004016-RA:c.53T>C	ASIC004016:p.Leu18Pro	90	96	93.75	80	86	93.0233	0.22895	0.252842	0.597151
1918	AS2_scf7180000695495	2432	A	C	ASIC004016-RA:c.70A>C	ASIC004016:p.Asn24His	73	79	92.4051	56	60	93.3333	0.254456	0.27557	0.559767
1919	AS2_scf7180000695498	76472	A	G	ASIC004025-RA:c.161A>G	ASIC004025:p.Asp54Gly	17	44	38.6364	17	42	40.4762	0.1718	0.209634	0.678537
1920	AS2_scf7180000695498	273930	A	G	ASIC004022-RA:c.1339T>C	ASIC004022:p.Tyr447His	146	146	100	139	140	99.2857	0.48951	0.502235	0.299093
1921	AS2_scf7180000695501	9038	G	A	ASIC004033-RA:c.404C>T	ASIC004033:p.Thr135Ile	23	42	54.7619	12	44	27.2727	0.00623385	0.0719358	1.14306
1922	AS2_scf7180000695501	14079	T	C	ASIC004034-RA:c.92T>C	ASIC004034:p.Leu31Ser	43	43	100	44	46	95.6522	0.2643	0.284347	0.546151
1923	AS2_scf7180000695501	14151	A	G	ASIC004034-RA:c.164A>G	ASIC004034:p.His55Arg	23	50	46	31	55	56.3636	0.0890285	0.209705	0.678391
1924	AS2_scf7180000695501	20577	C	A	ASIC004036-RA:c.3118C>A	ASIC004036:p.Leu1040Met	10	44	22.7273	22	44	50	0.00526593	0.0668054	1.17519
1925	AS2_scf7180000695501	20843	A	C	ASIC004036-RA:c.3384A>C	ASIC004036:p.Glu1128Asp	38	45	84.4444	41	41	100	0.00844555	0.0824374	1.08388
1926	AS2_scf7180000695501	28952	T	C	ASIC004036-RA:c.6728T>C	ASIC004036:p.Val2243Ala	42	43	97.6744	44	44	100	0.494253	0.506338	0.295559
1927	AS2_scf7180000695501	32388	T	A	ASIC004037-RA:c.1077T>A	ASIC004037:p.His359Gln	31	49	63.2653	44	53	83.0189	0.0143871	0.106518	0.972577
1928	AS2_scf7180000695502	5536	G	A	ASIC004044-RA:c.1018G>A	ASIC004044:p.Asp340Asn	16	44	36.3636	28	47	59.5745	0.0147761	0.10769	0.967823
1929	AS2_scf7180000695502	5631	A	T	ASIC004045-RA:c.31A>T	ASIC004045:p.Thr11Ser	43	46	93.4783	42	42	100	0.138332	0.223398	0.65092
1930	AS2_scf7180000695502	5634	G	A	ASIC004045-RA:c.34G>A	ASIC004045:p.Val12Ile	44	46	95.6522	42	42	100	0.270376	0.289872	0.537793
1931	AS2_scf7180000695502	5637	G	C	ASIC004045-RA:c.37G>C	ASIC004045:p.Ala13Pro	41	44	93.1818	37	40	92.5	0.321911	0.339422	0.46926
1932	AS2_scf7180000695502	5700	T	C	ASIC004045-RA:c.100T>C	ASIC004045:p.Ser34Pro	34	52	65.3846	36	42	85.7143	0.0152999	0.109842	0.959232
1933	AS2_scf7180000695502	6450	T	A	ASIC004046-RA:c.1301A>T	ASIC004046:p.Tyr434Phe	47	49	95.9184	48	48	100	0.252577	0.273917	0.56238
1934	AS2_scf7180000695502	6528	G	A	ASIC004046-RA:c.1223C>T	ASIC004046:p.Ala408Val	23	42	54.7619	20	44	45.4545	0.118536	0.221004	0.6556
1935	AS2_scf7180000695502	6978	C	T	ASIC004046-RA:c.841G>A	ASIC004046:p.Gly281Ser	28	51	54.902	19	40	47.5	0.131373	0.22238	0.652904
1936	AS2_scf7180000695502	18740	A	G	ASIC004049-RA:c.850A>G	ASIC004049:p.Asn284Asp	48	50	96	40	40	100	0.305868	0.323823	0.489693
1937	AS2_scf7180000695502	50478	A	C	ASIC004040-RA:c.165T>G	ASIC004040:p.His55Gln	39	46	84.7826	43	52	82.6923	0.207764	0.234403	0.630036
1938	AS2_scf7180000695502	61111	A	C	ASIC004041-RA:c.1224T>G	ASIC004041:p.Asp408Glu	19	42	45.2381	23	53	43.3962	0.161943	0.215642	0.666266
1939	AS2_scf7180000695504	90840	T	A	ASIC004096-RA:c.919A>T	ASIC004096:p.Thr307Ser	35	57	61.4035	36	44	81.8182	0.0148008	0.107774	0.967484
1940	AS2_scf7180000695504	132482	G	T	ASIC004053-RA:c.7944G>T	ASIC004053:p.Arg2648Ser	20	41	48.7805	33	46	71.7391	0.0163996	0.113884	0.943538
1941	AS2_scf7180000695504	134257	C	A	ASIC004053-RA:c.9584C>A	ASIC004053:p.Thr3195Asn	35	49	71.4286	34	47	72.3404	0.178487	0.211354	0.67499
1942	AS2_scf7180000695504	156011	C	T	ASIC004059-RA:c.40G>A	ASIC004059:p.Gly14Arg	31	43	72.093	31	47	65.9574	0.148907	0.221638	0.654356
1943	AS2_scf7180000695504	160007	A	G	ASIC004060-RA:c.26A>G	ASIC004060:p.Tyr9Cys	26	50	52	36	43	83.7209	0.000876196	0.0278001	1.55595
1944	AS2_scf7180000695504	194834	G	C	ASIC004066-RA:c.10G>C	ASIC004066:p.Glu4Gln	17	47	36.1702	32	53	60.3774	0.00881239	0.0840598	1.07541
1945	AS2_scf7180000695504	194890	A	T	ASIC004066-RA:c.66A>T	ASIC004066:p.Gln22His	49	50	98	44	44	100	0.531915	0.534729	0.271866
1946	AS2_scf7180000695504	194912	C	T	ASIC004066-RA:c.88C>T	ASIC004066:p.Pro30Ser	24	56	42.8571	19	51	37.2549	0.131904	0.222657	0.652364
1947	AS2_scf7180000695504	230098	C	G	ASIC004068-RA:c.953C>G	ASIC004068:p.Ser318Cys	36	42	85.7143	45	47	95.7447	0.0802927	0.204773	0.688726
1948	AS2_scf7180000695504	230113	T	A	ASIC004068-RA:c.968T>A	ASIC004068:p.Phe323Tyr	27	43	62.7907	33	40	82.5	0.0269549	0.139425	0.85566
1949	AS2_scf7180000695504	240575	G	C	ASIC004072-RA:c.659G>C	ASIC004072:p.Ser220Thr	18	42	42.8571	11	40	27.5	0.0650157	0.193649	0.712985
1950	AS2_scf7180000695504	240748	T	C	ASIC004072-RA:c.832T>C	ASIC004072:p.Ser278Pro	36	43	83.7209	36	44	81.8182	0.21697	0.242595	0.615118
1951	AS2_scf7180000695504	243898	C	A	ASIC004075-RA:c.372C>A	ASIC004075:p.Asp124Glu	17	54	31.4815	27	45	60	0.00292602	0.0499072	1.30184
1952	AS2_scf7180000695504	248114	G	A	ASIC004077-RA:c.380C>T	ASIC004077:p.Pro127Leu	22	42	52.381	13	44	29.5455	0.0176466	0.116739	0.932784
1953	AS2_scf7180000695504	258194	T	C	ASIC004079-RA:c.242T>C	ASIC004079:p.Leu81Pro	22	45	48.8889	19	53	35.8491	0.0704725	0.197788	0.7038
1954	AS2_scf7180000695504	272577	C	G	ASIC004081-RA:c.1024G>C	ASIC004081:p.Val342Leu	30	44	68.1818	38	47	80.8511	0.0742831	0.200394	0.698115
1955	AS2_scf7180000695504	273040	C	G	ASIC004081-RA:c.632G>C	ASIC004081:p.Ser211Thr	32	41	78.0488	21	45	46.6667	0.00202565	0.0416342	1.38055
1956	AS2_scf7180000695504	274362	G	C	ASIC004081-RA:c.37C>G	ASIC004081:p.Leu13Val	44	45	97.7778	43	43	100	0.511364	0.517124	0.286406
1957	AS2_scf7180000695504	275326	C	T	ASIC004082-RA:c.1738G>A	ASIC004082:p.Ala580Thr	26	47	55.3191	22	47	46.8085	0.116967	0.22057	0.656454
1958	AS2_scf7180000695504	306102	A	G	ASIC004087-RA:c.1745T>C	ASIC004087:p.Val582Ala	21	40	52.5	13	40	32.5	0.0358587	0.15542	0.808494
1959	AS2_scf7180000695504	306123	C	T	ASIC004087-RA:c.1724G>A	ASIC004087:p.Ser575Asn	27	44	61.3636	20	43	46.5116	0.0660036	0.193835	0.712567
1960	AS2_scf7180000695504	307159	A	G	ASIC004087-RA:c.1381T>C	ASIC004087:p.Ser461Pro	52	57	91.2281	23	43	53.4884	1.65842e-05	0.00483904	2.31524
1961	AS2_scf7180000695504	314421	G	A	ASIC004087-RA:c.68C>T	ASIC004087:p.Ala23Val	24	42	57.1429	31	40	77.5	0.0281273	0.141198	0.85017
1962	AS2_scf7180000695504	322931	G	A	ASIC004088-RA:c.32G>A	ASIC004088:p.Gly11Glu	21	47	44.6809	19	43	44.186	0.167817	0.211469	0.674752
1963	AS2_scf7180000695504	323111	A	G	ASIC004088-RA:c.212A>G	ASIC004088:p.Asn71Ser	19	50	38	14	43	32.5581	0.148857	0.221625	0.654382
1964	AS2_scf7180000695504	327828	T	A	ASIC004090-RA:c.371A>T	ASIC004090:p.His124Leu	35	42	83.3333	44	47	93.617	0.0860279	0.208437	0.681026
1965	AS2_scf7180000695504	327967	T	G	ASIC004090-RA:c.269A>C	ASIC004090:p.Tyr90Ser	29	42	69.0476	29	40	72.5	0.180992	0.212978	0.671665
1966	AS2_scf7180000695504	328015	C	A	ASIC004090-RA:c.221G>T	ASIC004090:p.Arg74Leu	18	40	45	21	44	47.7273	0.168001	0.211213	0.67528
1967	AS2_scf7180000695504	353922	C	T	ASIC004093-RA:c.10C>T	ASIC004093:p.Arg4Cys	45	45	100	42	46	91.3043	0.0610569	0.190613	0.719847
1968	AS2_scf7180000695504	423097	C	G	ASIC004105-RA:c.623C>G	ASIC004105:p.Ala208Gly	20	43	46.5116	19	57	33.3333	0.0678801	0.195137	0.70966
1969	AS2_scf7180000695504	430175	G	A	ASIC004106-RA:c.3139G>A	ASIC004106:p.Val1047Ile	20	44	45.4545	12	46	26.087	0.0285263	0.142413	0.846449
1970	AS2_scf7180000695504	435274	T	C	ASIC004108-RA:c.511A>G	ASIC004108:p.Ser171Gly	10	50	20	26	47	55.3191	0.000253086	0.0152599	1.81645
1971	AS2_scf7180000695504	435755	C	T	ASIC004108-RA:c.56G>A	ASIC004108:p.Ser19Asn	24	46	52.1739	24	44	54.5455	0.163124	0.215025	0.667512
1972	AS2_scf7180000695504	445895	C	T	ASIC004110-RA:c.263G>A	ASIC004110:p.Gly88Glu	22	49	44.898	13	44	29.5455	0.0541763	0.184118	0.734903
1973	AS2_scf7180000695504	483318	C	A	ASIC004113-RA:c.1007G>T	ASIC004113:p.Arg336Leu	23	42	54.7619	22	41	53.6585	0.173334	0.209442	0.678936
1974	AS2_scf7180000695504	483351	C	G	ASIC004113-RA:c.974G>C	ASIC004113:p.Trp325Ser	32	53	60.3774	26	50	52	0.109744	0.218845	0.659864
1975	AS2_scf7180000695504	483688	C	T	ASIC004113-RA:c.637G>A	ASIC004113:p.Ala213Thr	37	90	41.1111	34	81	41.9753	0.122615	0.221556	0.654516
1976	AS2_scf7180000695504	483724	A	C	ASIC004113-RA:c.601T>G	ASIC004113:p.Leu201Val	66	85	77.6471	59	87	67.8161	0.0483757	0.176402	0.753496
1977	AS2_scf7180000695504	483843	A	G	ASIC004113-RA:c.482T>C	ASIC004113:p.Val161Ala	37	70	52.8571	40	74	54.0541	0.131302	0.222445	0.652778
1978	AS2_scf7180000695504	483849	C	G	ASIC004113-RA:c.476G>C	ASIC004113:p.Ser159Thr	38	67	56.7164	42	73	57.5342	0.13499	0.223049	0.651599
1979	AS2_scf7180000695504	483853	A	C	ASIC004113-RA:c.472T>G	ASIC004113:p.Leu158Val	35	66	53.0303	42	74	56.7568	0.122564	0.221537	0.654553
1980	AS2_scf7180000695504	483927	C	T	ASIC004113-RA:c.398G>A	ASIC004113:p.Ser133Asn	27	62	43.5484	43	77	55.8442	0.0485306	0.176652	0.752882
1981	AS2_scf7180000695504	527545	G	A	ASIC004115-RA:c.127G>A	ASIC004115:p.Gly43Ser	21	42	50	21	50	42	0.1245	0.222526	0.652619
1982	AS2_scf7180000695504	543671	A	G	ASIC004116-RA:c.427T>C	ASIC004116:p.Trp143Arg	24	48	50	16	48	33.3333	0.0425361	0.167037	0.777188
1983	AS2_scf7180000695504	582282	T	G	ASIC004120-RA:c.283A>C	ASIC004120:p.Lys95Gln	54	55	98.1818	48	50	96	0.35941	0.377039	0.423614
1984	AS2_scf7180000695504	582368	A	G	ASIC004120-RA:c.197T>C	ASIC004120:p.Val66Ala	45	46	97.8261	41	49	83.6735	0.0176554	0.116609	0.933269
1985	AS2_scf7180000695504	632564	T	G	ASIC004124-RA:c.3376T>G	ASIC004124:p.Leu1126Val	50	53	94.3396	40	40	100	0.180525	0.212643	0.67235
1986	AS2_scf7180000695504	646813	T	C	ASIC004125-RA:c.19T>C	ASIC004125:p.Phe7Leu	16	43	37.2093	25	40	62.5	0.0127071	0.100306	0.998672
1987	AS2_scf7180000695505	13976	A	T	ASIC004129-RA:c.116T>A	ASIC004129:p.Val39Glu	22	43	51.1628	27	44	61.3636	0.108991	0.218677	0.660197
1988	AS2_scf7180000695505	13989	C	T	ASIC004129-RA:c.103G>A	ASIC004129:p.Gly35Arg	31	44	70.4545	32	41	78.0488	0.143877	0.222586	0.652502
1989	AS2_scf7180000695505	30339	G	A	ASIC004130-RA:c.1511C>T	ASIC004130:p.Ala504Val	8	40	20	25	49	51.0204	0.00181789	0.0392914	1.4057
1990	AS2_scf7180000695505	30415	C	T	ASIC004130-RA:c.1435G>A	ASIC004130:p.Gly479Ser	13	48	27.0833	24	42	57.1429	0.00270242	0.0485781	1.31356
1991	AS2_scf7180000695506	75500	C	T	ASIC004132-RA:c.1315G>A	ASIC004132:p.Ala439Thr	25	41	60.9756	16	40	40	0.0305032	0.145355	0.837571
1992	AS2_scf7180000695506	75598	A	T	ASIC004132-RA:c.1217T>A	ASIC004132:p.Ile406Asn	42	46	91.3043	36	41	87.8049	0.238422	0.261096	0.5832
1993	AS2_scf7180000695506	92286	G	C	ASIC004143-RA:c.14G>C	ASIC004143:p.Arg5Pro	16	40	40	26	45	57.7778	0.0461785	0.172628	0.762889
1994	AS2_scf7180000695506	117488	C	T	ASIC004155-RA:c.257C>T	ASIC004155:p.Ala86Val	20	51	39.2157	20	50	40	0.160551	0.216203	0.665138
1995	AS2_scf7180000695506	117518	C	A	ASIC004155-RA:c.287C>A	ASIC004155:p.Pro96Gln	22	52	42.3077	18	48	37.5	0.143862	0.222583	0.652507
1996	AS2_scf7180000695506	128161	C	T	ASIC004156-RA:c.136G>A	ASIC004156:p.Val46Met	18	48	37.5	22	44	50	0.0813771	0.205741	0.68668
1997	AS2_scf7180000695506	154584	C	T	ASIC004159-RA:c.37C>T	ASIC004159:p.Pro13Ser	20	50	40	24	56	42.8571	0.149791	0.221281	0.655056
1998	AS2_scf7180000695506	154910	T	C	ASIC004159-RA:c.293T>C	ASIC004159:p.Val98Ala	42	51	82.3529	27	48	56.25	0.00330179	0.0530494	1.27532
[truncated: 14,342 more rows]
